# Supplementary material for: Low pH constructed Co(ii) and Ni(ii) 1D coordination polymers based on Cα-substituted analogues of zoledronic acid: structural characterization, and spectroscopic and magnetic properties
Source: Royal Society of Chemistry journal article supplement (doi:10.1039/c9ra05673d), 2019-01-01
Supplement: c9ra05673d1.pdf [file c9ra05673d1.pdf]

Supplementary Information (ESI) for the paper

Low pH constructed Co(II) and Ni(II) 1D coordination polymers based on  
C<sub>α</sub>-substituted analogues of zoledronic acid: Structural characterization,  
spectroscopic and magnetic properties

Tomasz Rojek<sup>a</sup>, Waldemar Goldeman<sup>a</sup>, Katarzyna Ślepokura<sup>b</sup>, Marek Duczmał<sup>a</sup>,  
Agnieszka Wojciechowska<sup>a</sup>, Ewa Matczak-Jon<sup>a\*</sup>

<sup>a</sup>Department of Chemistry, Wrocław University of Science and Technology, Wybrzeże  
Wyspiańskiego 27, 50-370 Wrocław, Poland. E-mail: ewa.matczak-jon@pwr.edu.pl

<sup>b</sup>Faculty of Chemistry, University of Wrocław, Joliot-Curie 14, 50-383 Wrocław, Poland.

**Table S1.** Coordination modes of BPs in known 1D metal complexes of 1:1 molar ratio with various metal ions.

| <i>Lp.</i>                  | <i>Database refcode</i> | <i>Formula<sup>a</sup></i>                    | <i>Space group</i>                                    | <i>Coordination mode</i>                                                             | <i>Source</i>                                                                  |
|-----------------------------|-------------------------|-----------------------------------------------|-------------------------------------------------------|--------------------------------------------------------------------------------------|--------------------------------------------------------------------------------|
| <b>Coordination mode Ia</b> |                         |                                               |                                                       |                                                                                      |                                                                                |
| 1.                          | LILQII                  | [Ca(H <sub>2</sub> Ale)]·H <sub>2</sub> O     | <i>P</i> 2 <sub>1</sub> 2 <sub>1</sub> 2 <sub>1</sub> | 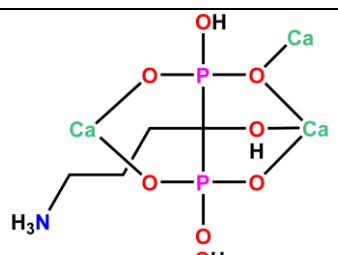  | E. Alvarez <i>et al.</i> , <i>CrystEngComm</i> , <b>15</b> (2013) 9899-9905    |
| 2.                          | ODEPEV                  | [Cd(H <sub>2</sub> 4py-Ris)]·H <sub>2</sub> O | <i>P</i> 2 <sub>1</sub> /c                            |   | W.-Y. Yin <i>et al.</i> , <i>J. Mol. Eng. Mater.</i> , <b>2</b> (2014) 1440003 |
| 3.                          | YUDPAP                  | [Mn(H <sub>2</sub> Ris)]·3H <sub>2</sub> O    | <i>P</i> 1̄                                           |  | Y. Ma <i>et al.</i> , <i>Inorg. Chem. Commun.</i> , <b>12</b> (2009) 860-863   |

---

**Coordination mode Ib**

---

1. GIKPEW [Mn(H<sub>2</sub>Ale)]·H<sub>2</sub>O  $P2_1/c$

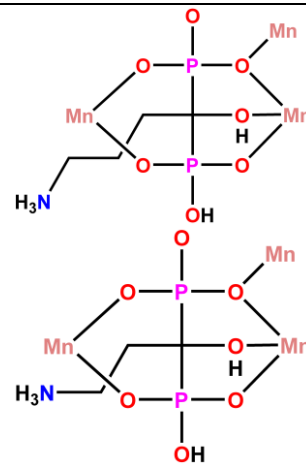

Z.-C. Zhang *et al.*, *Inorg. Chem. Commun.*, **10** (2007) 1063-1066

2. XEHTAG [Mn(H<sub>2</sub>Pam)]·H<sub>2</sub>O  $P\bar{1}$

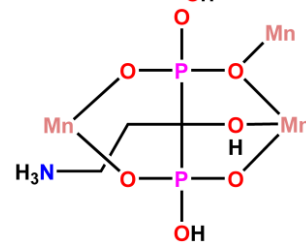

Y. Gong *et al.*, *Inorg. Chem.*, **45** (2006) 4987-4995

---

**Coordination mode Ic**

---

1. XEHTEK [Co(H<sub>2</sub>Pam)]·H<sub>2</sub>O  $P\bar{1}$

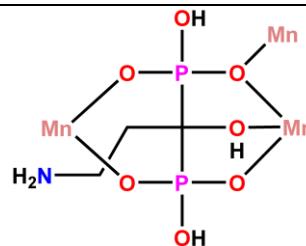

Y. Gong *et al.*, *Inorg. Chem.*, **45** (2006) 4987-4995

---

**Coordination mode IIa**

---

1. GAPSIC [Cd(H<sub>2</sub>Ris)]·H<sub>2</sub>O  $P2_1/c$

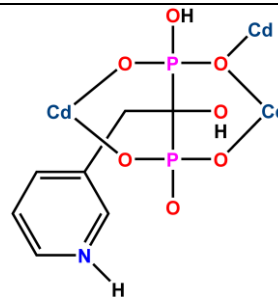

K.-R. Ma *et al.*, *J. Mol. Struct.*, **1139** (2017) 67-77

|    |        |                                                                  |          |  |                                                                                |
|----|--------|------------------------------------------------------------------|----------|--|--------------------------------------------------------------------------------|
| 2. | ODEPAR | $[\text{Zn}(\text{H}_24\text{py-Ris})] \cdot \text{H}_2\text{O}$ | $P2_1/c$ |  | W.-Y. Yin <i>et al.</i> , <i>J. Mol. Eng. Mater.</i> , <b>2</b> (2014) 1440003 |
| 3. | OGASOG | $[\text{Mn}(\text{H}_24\text{py-Ris})] \cdot \text{H}_2\text{O}$ | $P2_1/c$ |  | Y.-S. Ma <i>et al.</i> , <i>RSC Adv.</i> , <b>3</b> (2013) 18430-18440         |
| 4. | OGATUN | $[\text{Co}(\text{H}_24\text{py-Ris})] \cdot \text{H}_2\text{O}$ | $P2_1/c$ |  | Y.-S. Ma <i>et al.</i> , <i>RSC Adv.</i> , <b>3</b> (2013) 18430-18440         |

|                              |          |                                           |            |                                                                                      |                                                                               |
|------------------------------|----------|-------------------------------------------|------------|--------------------------------------------------------------------------------------|-------------------------------------------------------------------------------|
| 5.                           | OGATAT   | [Cu(H <sub>2</sub> 4py-Ris)]              | $P\bar{1}$ | 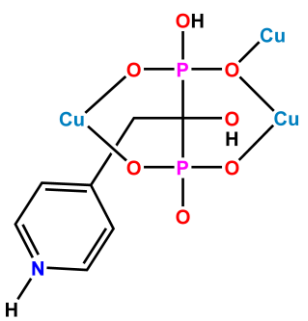  | Y.-S. Ma <i>et al.</i> , <i>RSC Adv.</i> , <b>3</b> (2013)<br>18430-18440     |
| 6.                           | OXAMUW   | [Mn(H <sub>2</sub> Zol)]·H <sub>2</sub> O | $P2_1/c$   |   | D.-K. Cao <i>et al.</i> , <i>Inorg. Chem.</i> , <b>50</b><br>(2011) 2278-2287 |
| <b>Coordination mode IIb</b> |          |                                           |            |                                                                                      |                                                                               |
| 1.                           | KEVVOX01 | [Cu(H <sub>2</sub> Pam)]·H <sub>2</sub> O | $P2_1/c$   |  | G. Li <i>et al.</i> , <i>J. Coord. Chem.</i> , <b>61</b> (2008)<br>540-549    |

---

**Coordination mode III**

---

1. DUPXOC

[Zn(H<sub>2</sub>Ris)]*P*2<sub>1</sub>/*n*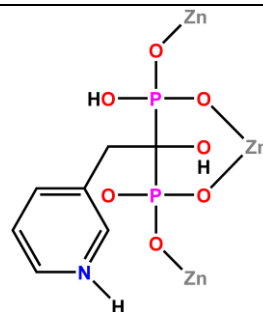X. Huang *et al.*, *Acta Cryst.*, **E66**  
(2010) m59-m60

---

**Coordination mode IV**

---

1. HIRJUP

[Fe(H<sub>2</sub>Ris)(H<sub>2</sub>O)]*P*2<sub>1</sub>/*n*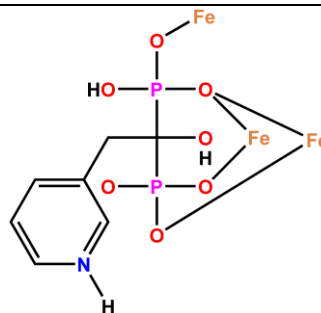K.-R. Ma *et al.*, *Synth. Met.*, **182**  
(2013) 40-48

2. MINKEA

[Co(H<sub>2</sub>Ris)(H<sub>2</sub>O)]*P*2<sub>1</sub>/*n*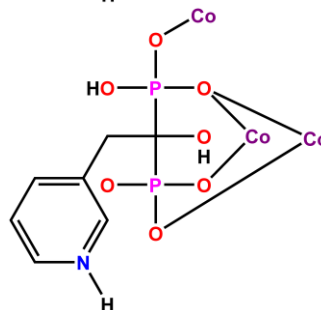Z.-C. Zhang *et al.*, *Dalton Trans.*, **0**  
(2007) 4681-4684

3. PUNZII [Mn(H<sub>2</sub>Ris)(H<sub>2</sub>O)] *P2<sub>1</sub>/n*

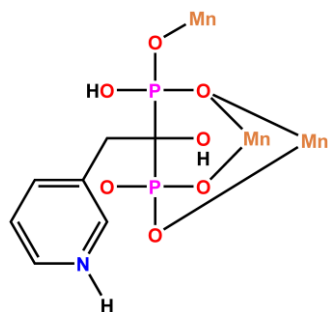

J. Zhao *et al.*, *Inorg. Chim. Acta*, **363**  
(2010) 662-668

**Coordination mode V**

1. TAMMAX [Ca(H<sub>2</sub>Pam)(H<sub>2</sub>O)]·H<sub>2</sub>O *Pna2<sub>1</sub>*

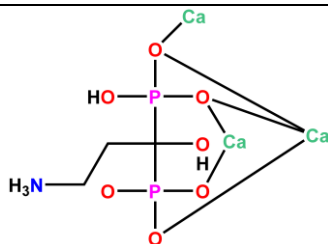

D. Liu *et al.*, *Chem. Commun.*, **48**  
(2012) 2668-2670

2. TAMMEB [Ca(H<sub>2</sub>Zol)(H<sub>2</sub>O)] *Pna2<sub>1</sub>*

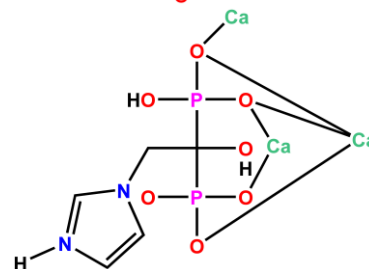

D. Liu *et al.*, *Chem. Commun.*, **48**  
(2012) 2668-2670

<sup>a</sup>Abbreviations: H<sub>4</sub>Ale – alendronic acid, H<sub>4</sub>Pam – pamidronic acid, H<sub>4</sub>Ris – risedronic acid, H<sub>4</sub>4Py-Ris – 1-hydroxy-2-(4-pyridyl)ethylidene-1,1-diphosphonic acid, H<sub>4</sub>Zol – zoledronic acid

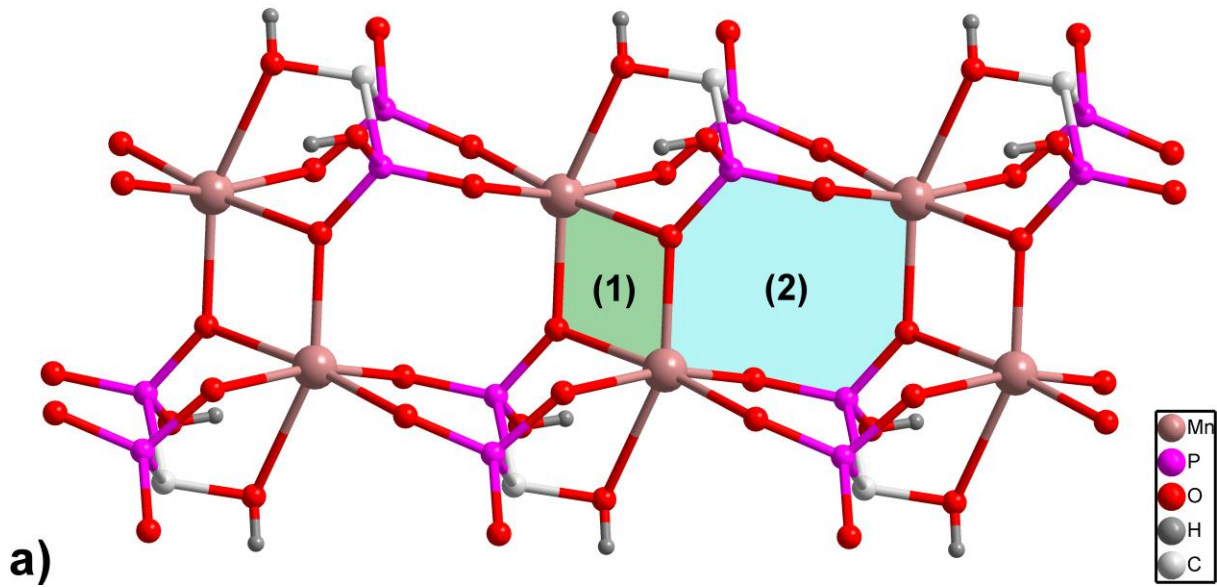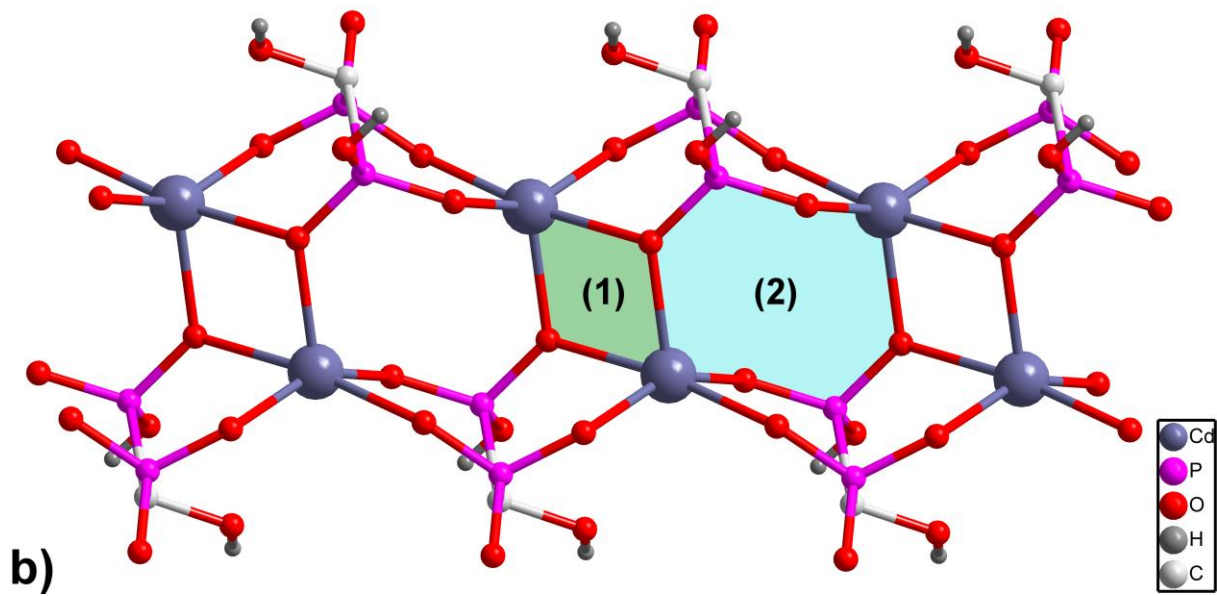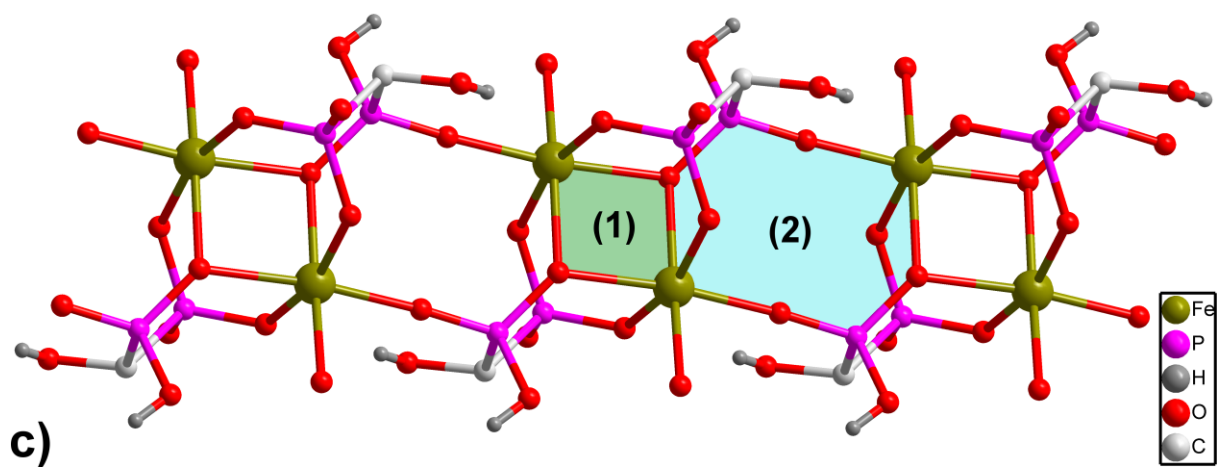



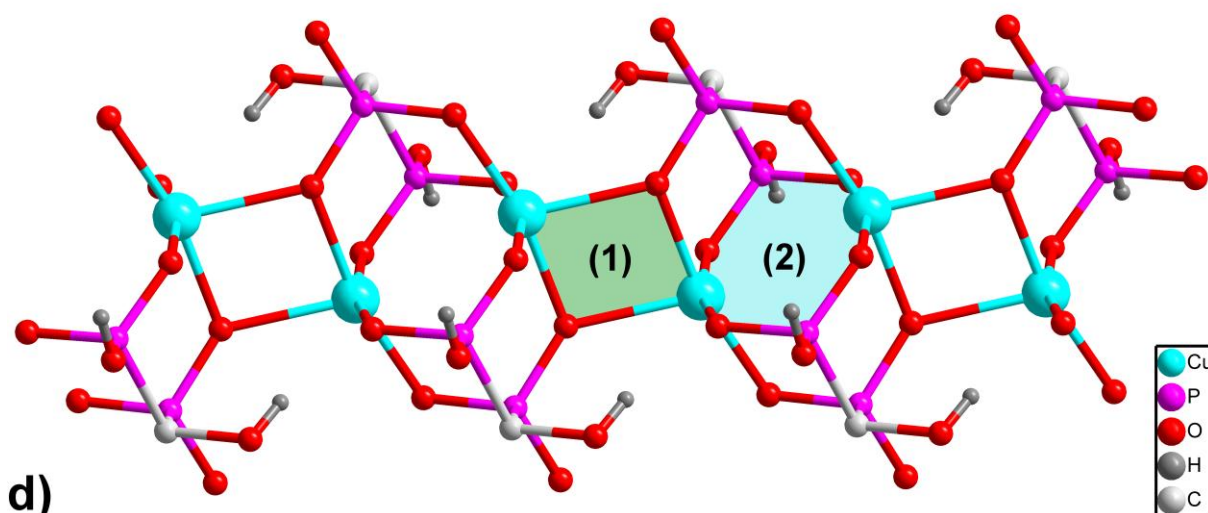

**d)**

**Figure S1.** The family of BPs-based coordination polymers with 1:1 metal-to-ligand stoichiometry displaying 1D ladder-type coordination chains with common 4- and 8-membered ring systems connecting metal centres through  $\mu_2$ -O and O-P-O bridges (marked as 1 and 2, respectively). (a) The architecture of 1D chain of representative  $[\text{Mn}(\text{H}_2\text{Ris})]\cdot 3\text{H}_2\text{O}$  complex (Refcode YUDPAP, observed also in: ODEPEV, GIKPEW, XEHTG and XEHTEK, Table S1) based on six-coordinated metal centre with coordinated hydroxyl oxygen atom. (b) The ladder architecture in representative  $[\text{Cd}(\text{H}_2\text{Ris})]\cdot \text{H}_2\text{O}$  complex (Refcode GAPSIC, observed also in: ODEPAR, OGASOG, OGATUN and OXAMUW, Table S1) based on five-coordinated metal centre with hydroxyl oxygen atom remaining uncoordinated. (c) The double  $\mu_2$ -O and double O-P-O bridged dimeric core in representative  $[\text{Fe}(\text{H}_2\text{Ris})(\text{H}_2\text{O})]$  complex (Refcode HIRJUP, observed also in: MINKEA and PUNZII, Table S1) resulting from the replacement of the hydroxyl oxygen atom with a water molecule in metal coordination sphere. (d) The formation of linear chain architecture displayed by representative  $[\text{Cu}(\text{H}_2\text{Pam})]\cdot \text{H}_2\text{O}$  complex (Refcode KEVVOX01, observed also in: OGATAT, Table S1) caused by the different arrangement of five-coordinated metal core compared to structures gathered in point b.

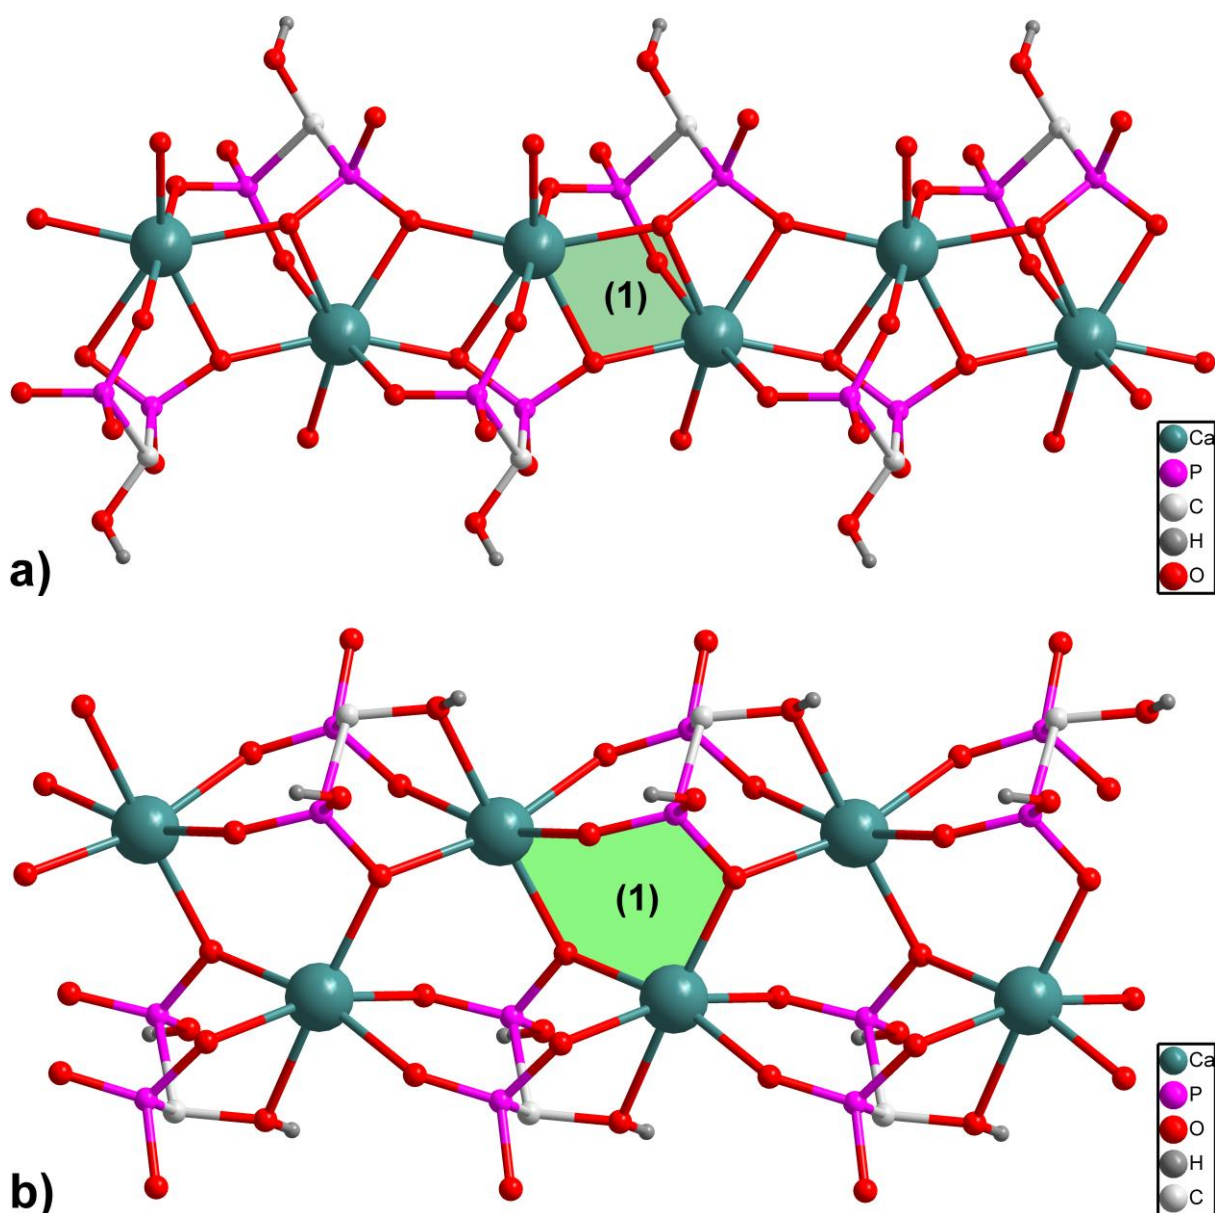

**Figure S2.** The schematic representation of *zig-zag* chain structures observed in BPs-based Ca(II) coordination polymers. (a) The seven-coordinate Ca(II) centres linked through  $\mu_2$ -O phosphonate bridges into 4-membered ring (marked as 1) in representative  $[\text{Ca}(\text{H}_2\text{Pam})(\text{H}_2\text{O})]\cdot\text{H}_2\text{O}$  complex (Refcode TAMMAX, observed also in: TAMMEB, Table S1). (b) The propagation of dimeric units into coordination chains in the  $[\text{Ca}(\text{H}_2\text{Ale})]\cdot\text{H}_2\text{O}$  complex (Refcode LILQII, Table S1). The lower coordination number of Ca(II) ion and replacement of the water molecule with the hydroxyl oxygen atom in metal coordination sphere resulting in formation of 6-membered rings (marked as 1) connecting metal centres by the mixed phosphonate O-P-O and  $\mu_2$ -O bridges.

### X-ray powder pattern for 1a

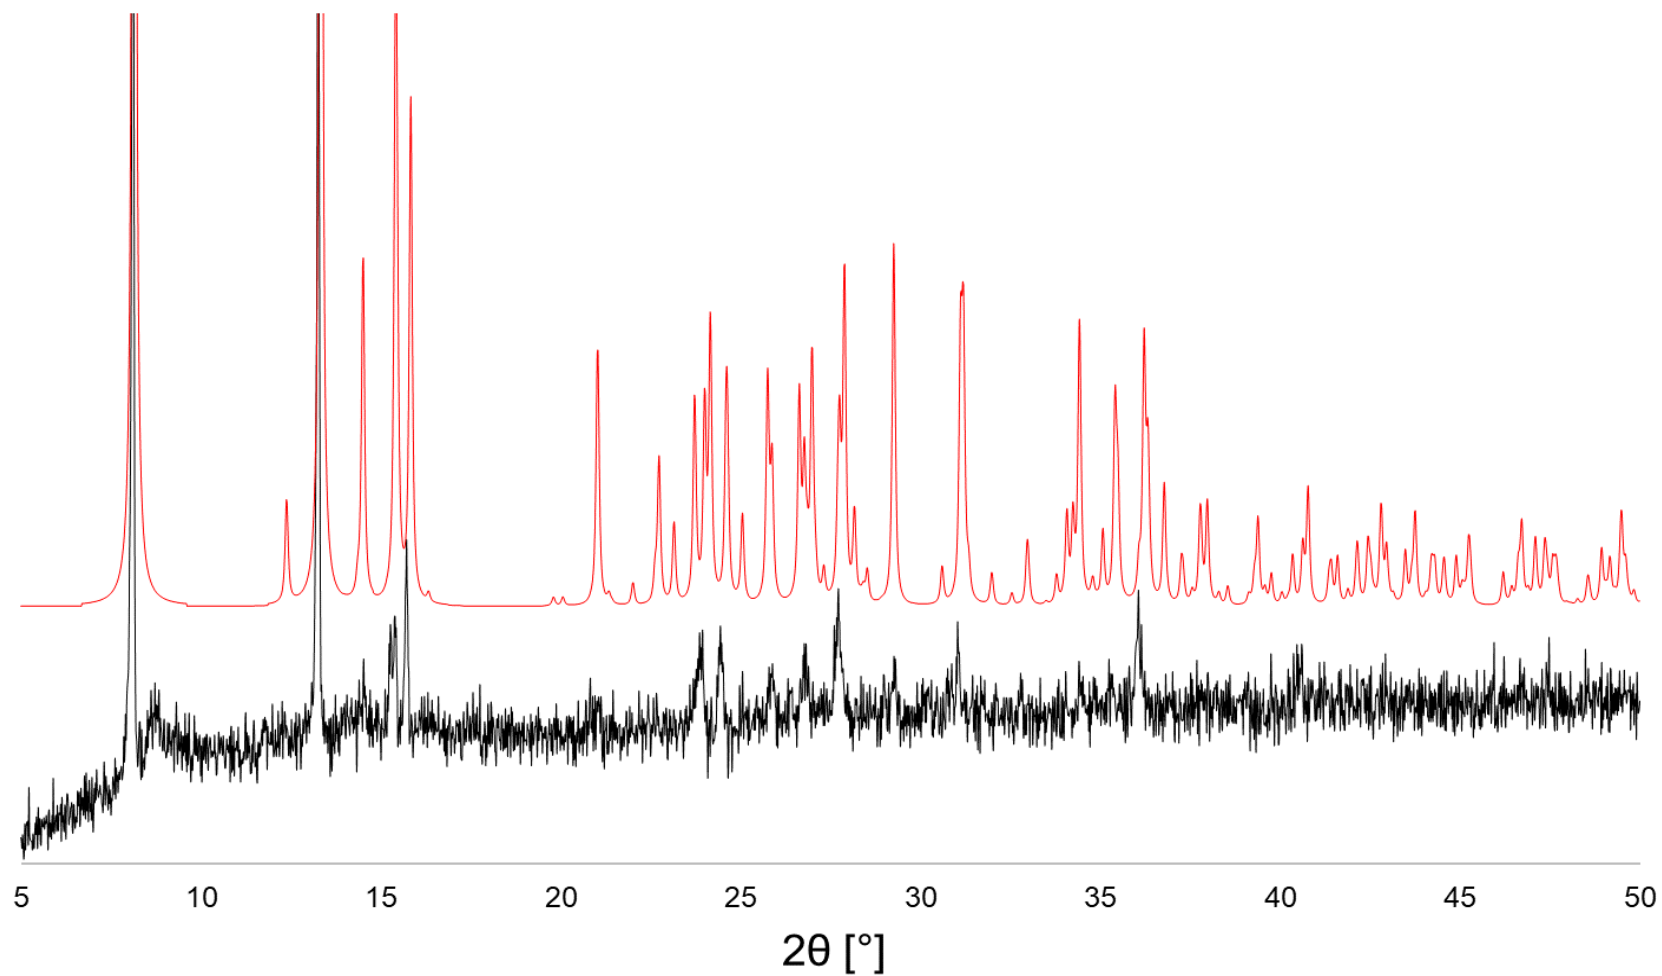

**Figure S3.** Experimental X-ray powder pattern (black, T = 298 K, Cu-K $\alpha$ 1) and simulated powder pattern (red, T = 80 K, Mo-K $\alpha$ ) based on the results from single-crystal X-ray diffraction for the complex **1a**.

## X-ray powder pattern for 1b

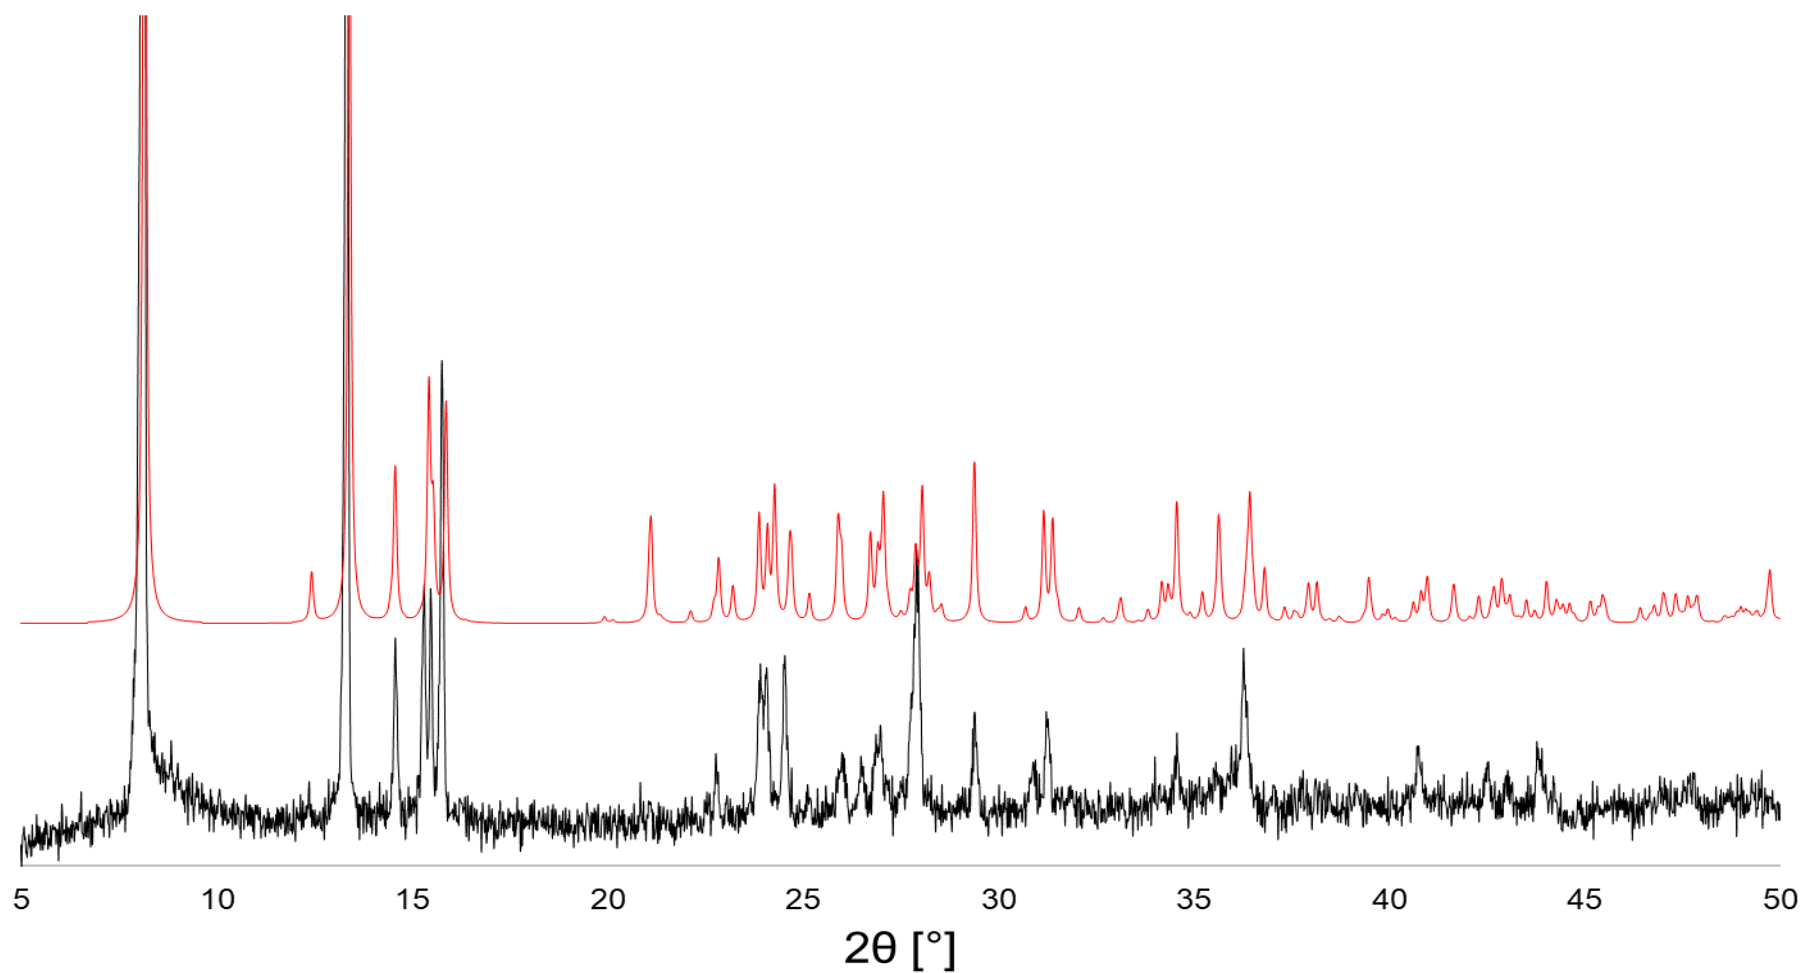

**Figure S4.** Experimental X-ray powder pattern (black,  $T = 298$  K,  $\text{Cu-K}\alpha$ ) and simulated powder pattern (red,  $T = 80$  K,  $\text{Mo-K}\alpha$ ) based on the results from single-crystal X-ray diffraction for the complex **1b**.

## X-ray powder pattern for 2a

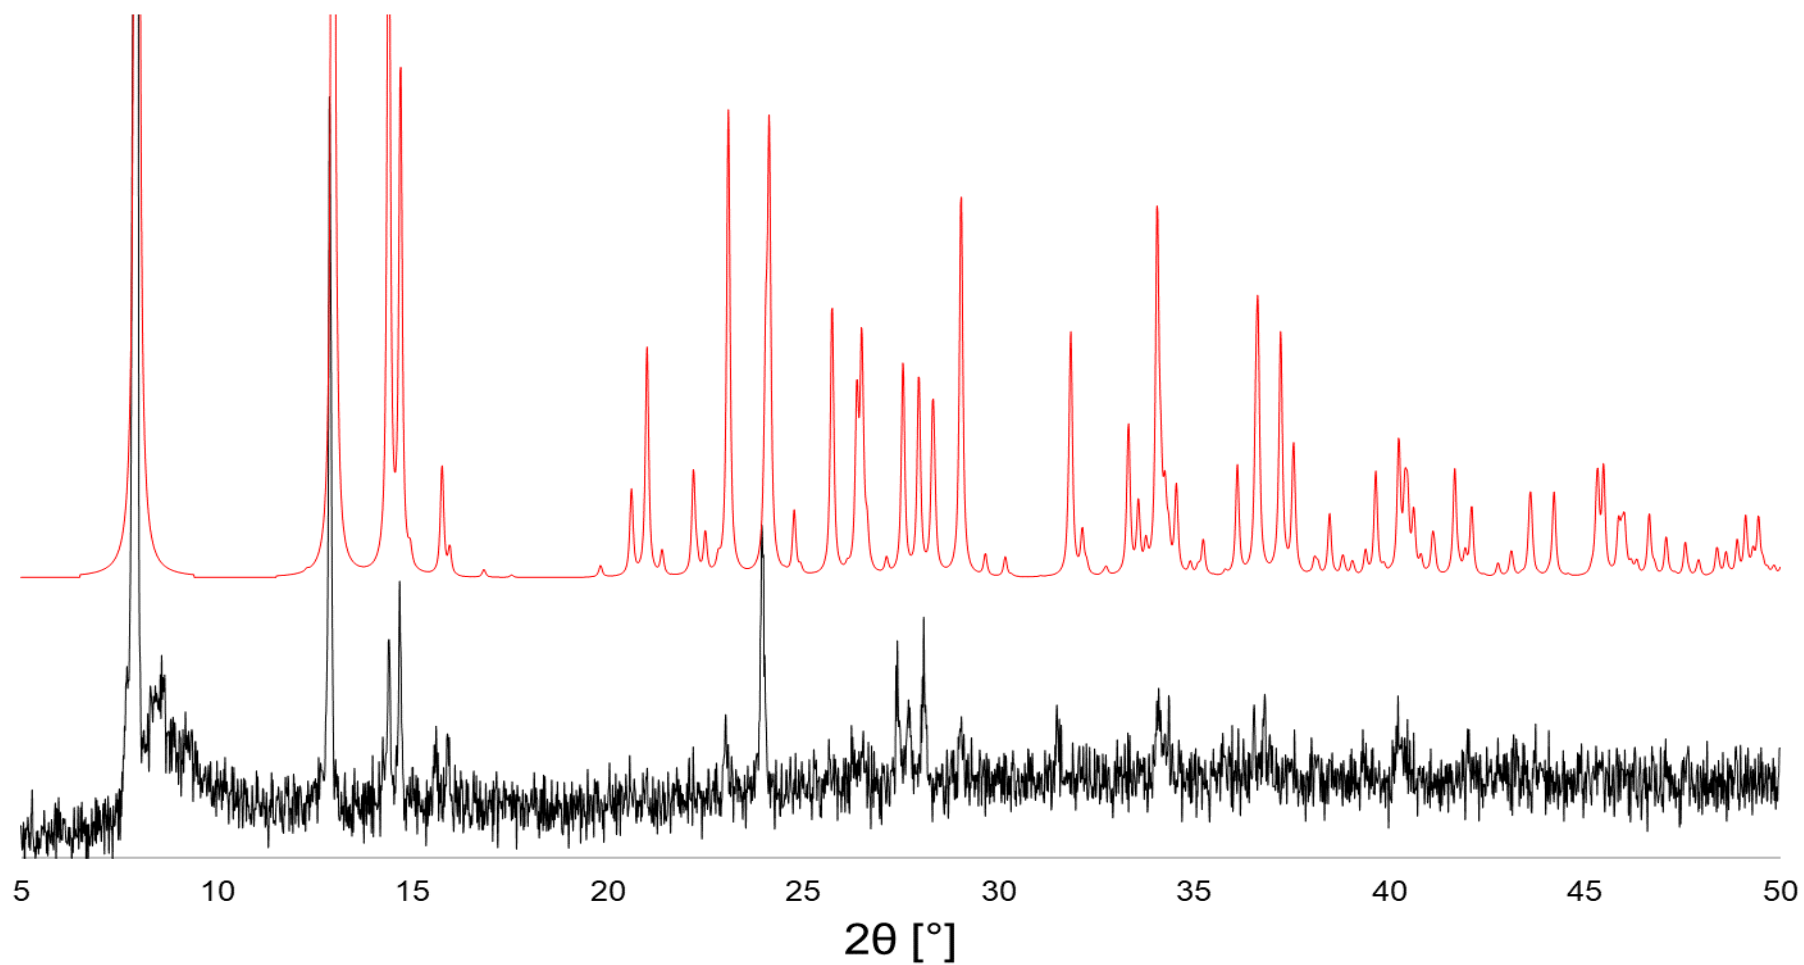

**Figure S5.** Experimental X-ray powder pattern (black,  $T = 298$  K,  $\text{Cu-K}\alpha 1$ ) and simulated powder pattern (red,  $T = 80$  K,  $\text{Mo-K}\alpha$ ) based on the results from single-crystal X-ray diffraction for the complex **2a**.

**Table S2.** Selected interatomic distances (Å), bond angles (°) and torsion angles (°) for the compounds **1a**, **1b** and **2a**.

|                       | <b>1a</b>  | <b>1b</b> | <b>2a</b>   |
|-----------------------|------------|-----------|-------------|
| <i>Bond lengths</i>   |            |           |             |
| P1–O1                 | 1.498(2)   | 1.502(4)  | 1.4955(15)  |
| P1–O2                 | 1.512(2)   | 1.515(4)  | 1.5153(16)  |
| P1–O3                 | 1.579(2)   | 1.577(4)  | 1.5798(16)  |
| P2–O4                 | 1.517(2)   | 1.507(4)  | 1.5204(15)  |
| P2–O5                 | 1.523(2)   | 1.528(4)  | 1.5226(16)  |
| P2–O6                 | 1.539(2)   | 1.544(4)  | 1.5401(16)  |
| <i>Bond angles</i>    |            |           |             |
| N1–C2–C1              | 115.5(2)   | 115.2(4)  | 110.32(17)  |
| O1–P1–O2              | 117.39(12) | 117.9(2)  | 117.88(9)   |
| O1–P1–O3              | 105.77(12) | 105.6(2)  | 107.07(9)   |
| O2–P1–O3              | 111.53(11) | 111.5(2)  | 110.74(9)   |
| O4–P2–O5              | 112.58(12) | 112.9(2)  | 112.73(9)   |
| O4–P2–O6              | 112.76(11) | 113.6(2)  | 112.67(8)   |
| O5–P2–O6              | 113.01(11) | 112.6(2)  | 112.80(9)   |
| <i>Torsion angles</i> |            |           |             |
| O7–C1–C2–N1           | 165.1(2)   | 165.3(4)  | -172.66(15) |
| P1–C1–C2–N1           | -81.2(2)   | -81.2(5)  | -59.03(18)  |
| P2–C1–C2–N1           | 44.6(3)    | 45.1(6)   | 68.34(19)   |
| O7–C1–C2–C3           | -49.5(3)   | -50.0(6)  | -43.1(2)    |
| P1–C1–C2–C3           | 64.2(3)    | 63.4(6)   | 70.49(19)   |
| P2–C1–C2–C3           | -170.1(2)  | -170.3(4) | -162.14(14) |
| O7–C1–C2–C4           | 20.8(3)    | 21.3(7)   | -           |
| P1–C1–C2–C4           | 134.5(2)   | 134.7(4)  | -           |
| P2–C1–C2–C4           | -99.8(3)   | -99.0(5)  | -           |
| O7–C1–C2–C5           | -          | -         | 58.3(2)     |
| P1–C1–C2–C5           | -          | -         | 171.93(14)  |
| P2–C1–C2–C5           | -          | -         | -60.7(2)    |

**Table S3.** Selected interatomic distances (Å) and bond angles (°) for the compounds **1a**, **1b** and **2a**.

|                                      | <b>1a</b><br>[M = Co(II)] | <b>1b</b><br>[M = Ni(II)] |                                        | <b>2a</b><br>[M = Co(II)] |
|--------------------------------------|---------------------------|---------------------------|----------------------------------------|---------------------------|
| <i>Bond lengths (Å)</i>              |                           |                           |                                        |                           |
| M1–O4 <sup>i</sup>                   | 2.023(2)                  | 2.028(4)                  | M1–O4 <sup>iii</sup>                   | 2.0419(15)                |
| M1–O2                                | 2.081(2)                  | 2.064(4)                  | M1–O2                                  | 2.0666(15)                |
| M1–O1 <sup>ii</sup>                  | 2.071(2)                  | 2.048(4)                  | M1–O1 <sup>iv</sup>                    | 2.0734(15)                |
| M1–O1W                               | 2.1161(19)                | 2.060(3)                  | M1–O1W                                 | 2.1640(17)                |
| M1–O6                                | 2.183(2)                  | 2.145(4)                  | M1–O6                                  | 2.1773(15)                |
| M1–O7                                | 2.1888(18)                | 2.125(3)                  | M1–O7                                  | 2.1946(17)                |
| <i>Bond angles (°)</i>               |                           |                           |                                        |                           |
| O4 <sup>i</sup> –M1–O2               | 171.79(8)                 | 173.47(16)                | O4 <sup>iii</sup> –M1–O2               | 175.85(6)                 |
| O4 <sup>i</sup> –M1–O1 <sup>ii</sup> | 92.69(8)                  | 91.15(15)                 | O4 <sup>iii</sup> –M1–O1 <sup>iv</sup> | 90.90(6)                  |
| O2–M1–O1 <sup>ii</sup>               | 89.88(8)                  | 90.09(16)                 | O2–M1–O1 <sup>iv</sup>                 | 91.51(6)                  |
| O4 <sup>i</sup> –M1–O1W              | 92.10(8)                  | 92.46(15)                 | O4 <sup>iii</sup> –M1–O1W              | 95.47(6)                  |
| O2–M1–O1W                            | 95.77(8)                  | 93.97(15)                 | O2–M1–O1W                              | 87.75(6)                  |
| O1 <sup>ii</sup> –M1–O1W             | 88.28(8)                  | 89.23(15)                 | O1 <sup>iv</sup> –M1–O1W               | 93.59(6)                  |
| O4 <sup>i</sup> –M1–O6               | 91.34(8)                  | 92.07(15)                 | O4 <sup>iii</sup> –M1–O6               | 90.97(6)                  |
| O2–M1–O6                             | 86.17(8)                  | 86.68(14)                 | O2–M1–O6                               | 86.35(6)                  |
| O1 <sup>ii</sup> –M1–O6              | 175.96(8)                 | 176.76(17)                | O1 <sup>iv</sup> –M1–O6                | 174.96(6)                 |
| O1W–M1–O6                            | 91.27(8)                  | 90.95(14)                 | O1W–M1–O6                              | 90.89(6)                  |
| O4 <sup>i</sup> –M1–O7               | 89.38(8)                  | 89.43(15)                 | O4 <sup>iii</sup> –M1–O7               | 92.01(6)                  |
| O2–M1–O7                             | 82.48(8)                  | 84.05(14)                 | O2–M1–O7                               | 84.36(6)                  |
| O1 <sup>ii</sup> –M1–O7              | 100.45(8)                 | 97.95(14)                 | O1 <sup>iv</sup> –M1–O7                | 96.53(6)                  |
| O1W–M1–O7                            | 171.08(7)                 | 172.54(16)                | O1W–M1–O7                              | 167.32(6)                 |

Symmetry codes: (i)  $-x+1, -y+1, -z+1$ ; (ii)  $-x+2, -y+2, -z+1$ ; (iii)  $-x+1/2, -y+3/2, -z+1$ ; (iv)  $-x+1/2, -y+1/2, -z+1$ .

**Table S4.** (a) Proposed hydrogen bonds for **1a**, **1b** and **2a**.

| <i>D</i> –H··· <i>A</i>      | <i>D</i> –H |           | H··· <i>A</i> |           | <i>D</i> ··· <i>A</i> |           | <i>D</i> –H··· <i>A</i> |           |
|------------------------------|-------------|-----------|---------------|-----------|-----------------------|-----------|-------------------------|-----------|
| <i>Compound</i>              | <i>1a</i>   | <i>1b</i> | <i>1a</i>     | <i>1b</i> | <i>1a</i>             | <i>1b</i> | <i>1a</i>               | <i>1b</i> |
| O3–H3···O5                   | 0.84        | 0.84      | 1.80          | 1.79      | 2.602(3)              | 2.586(5)  | 159                     | 157       |
| O7–H7···O6 <sup>i</sup>      | 0.84        | 0.84      | 1.87          | 1.89      | 2.703(3)              | 2.714(5)  | 169                     | 166       |
| C3–H3A···O5 <sup>v</sup>     | 0.99        | 0.99      | 2.60          | 2.56      | 3.350(4)              | 3.325(6)  | 133                     | 134       |
| C4–H4B···O3 <sup>vi</sup>    | 0.99        | 0.99      | 2.60          | 2.58      | 3.566(4)              | 3.540(7)  | 164                     | 164       |
| N2–H2···O5 <sup>vii</sup>    | 0.88        | 0.88      | 1.82          | 1.82      | 2.682(3)              | 2.683(6)  | 166                     | 166       |
| C21–H21···O2W <sup>i</sup>   | 0.95        | 0.95      | 2.46          | 2.44      | 3.195(4)              | 3.185(7)  | 135                     | 135       |
| C41–H41···O1 <sup>viii</sup> | 0.95        | 0.95      | 2.60          | 2.56      | 3.493(4)              | 3.468(6)  | 158                     | 159       |
| C51–H51···O2W <sup>ii</sup>  | 0.95        | 0.95      | 2.52          | 2.51      | 3.374(4)              | 3.359(7)  | 149                     | 148       |
| O1W–H1W···O6 <sup>ix</sup>   | 0.84        | 0.84      | 2.23          | 2.25      | 2.950(3)              | 2.945(5)  | 143                     | 140       |
| O1W–H2W···O2 <sup>ix</sup>   | 0.84        | 0.84      | 2.05          | 2.03      | 2.806(3)              | 2.784(5)  | 150                     | 149       |
| O2W–H3W···O5 <sup>ix</sup>   | 0.84        | 0.84      | 2.39          | 2.47      | 3.227(3)              | 3.229(6)  | 174                     | 150       |
| O2W–H4W···O1 <sup>ii</sup>   | 0.84        | 0.84      | 2.30          | 2.27      | 3.075(3)              | 3.093(6)  | 154                     | 165       |
| <i>Compound 2a</i>           |             |           |               |           |                       |           |                         |           |
| O3–H3···O5                   | 0.84        |           | 1.80          |           | 2.611(2)              |           | 163                     |           |
| O7–H7···O6 <sup>iii</sup>    | 0.84        |           | 1.89          |           | 2.698(2)              |           | 161                     |           |
| N2–H2N···O5 <sup>x</sup>     | 0.88        |           | 1.79          |           | 2.666(2)              |           | 174                     |           |
| C3–H3A···O5 <sup>xi</sup>    | 0.99        |           | 2.53          |           | 3.289(3)              |           | 134                     |           |
| C5–H5A···O1W <sup>iii</sup>  | 0.99        |           | 2.41          |           | 3.239(3)              |           | 141                     |           |
| C21–H21···O2W <sup>iv</sup>  | 0.95        |           | 2.25          |           | 3.154(3)              |           | 158                     |           |
| C41–H41···O3 <sup>xiii</sup> | 0.95        |           | 2.47          |           | 3.206(3)              |           | 134                     |           |
| O1W–H1W···O6 <sup>xii</sup>  | 0.84        |           | 2.46          |           | 3.102(2)              |           | 134                     |           |
| O1W–H2W···O2 <sup>xii</sup>  | 0.84        |           | 2.09          |           | 2.865(2)              |           | 153                     |           |
| O2W–H3W···O1W                | 0.84        |           | 2.26          |           | 2.984(3)              |           | 145                     |           |
| O2W–H4W···O4 <sup>iii</sup>  | 0.84        |           | 2.56          |           | 3.173(3)              |           | 130                     |           |

Symmetry codes: (i)  $-x+1, -y+1, -z+1$ ; (ii)  $-x+2, -y+2, -z+1$ ; (iii)  $-x+1/2, -y+3/2, -z+1$ ; (iv)  $-x+1/2, -y+1/2, -z+1$ ; (v)  $x, y+1, z$ ; (vi)  $x-1, y, z$ ; (vii)  $-x+1, -y+1, -z+2$ ; (viii)  $-x+2, -y+2, -z+2$ ; (ix)  $-x+2, -y+1, -z+1$ ; (x)  $-x+1/2, y-1/2, -z+3/2$ ; (xi)  $x+1/2, y-1/2, z$ ; (xii)  $-x, -y+1, -z+1$ ; (xiii)  $-x+1/2, y+1/2, -z+3/2$



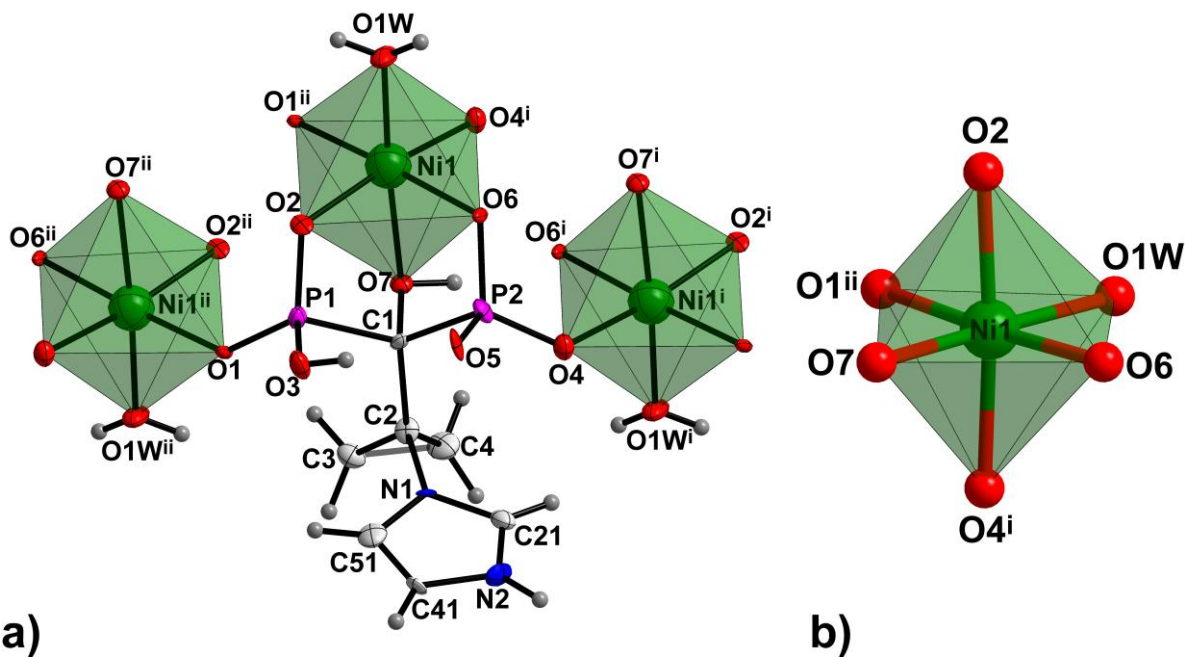

**Figure S6.** (a) The building unit and the atom-numbering scheme of complex **1b**. Lattice water molecule is omitted for clarity. Displacement ellipsoids except Ni1 atoms are drawn at 80% probability level. (b) Coordination environments of Ni1 center in **1b**. Symmetry codes are given in Table S3.

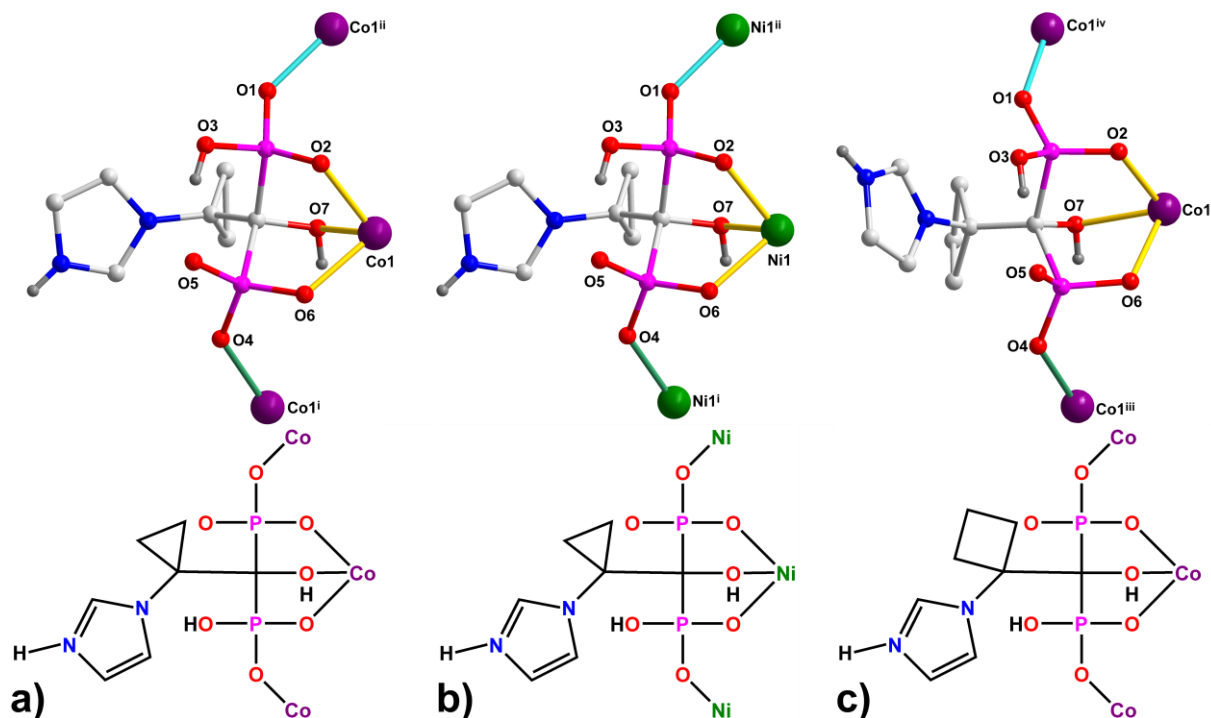

**Figure S7.** Coordination modes of  $\text{H}_2\text{cppZol}^{2-}$  and  $\text{H}_2\text{cztZol}^{2-}$  (above) and its schematic representation (below) in (a) **1a**, (b) **1b** and (c) **2a**. All C-bound H-atoms are omitted for clarity. Symmetry codes are given in Table S3.

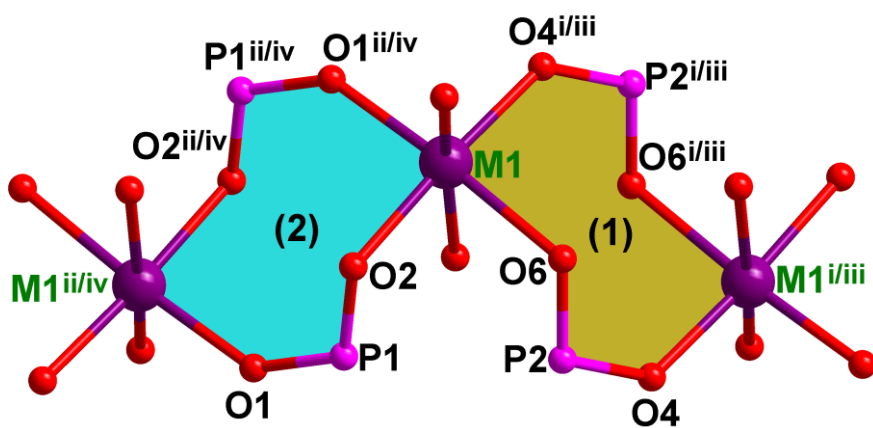

**Figure S8.** Connection of M(II) centres (M = Co in **1a** and **2a**, M = Ni in **1b**) leading to the formation of two 8-membered rings (1 and 2) with  $M1 \cdots M1^{i/iii}$  and  $M1 \cdots M1^{ii/iv}$  distances of 4.850(3) and 4.841(3) Å in **1a**, 4.797(3) and 4.841(3) Å in **1b** and 4.822(2) and 4.859(2) Å in **2a** across the O–P–O bridge, respectively. Symmetry codes are given in Table S3.

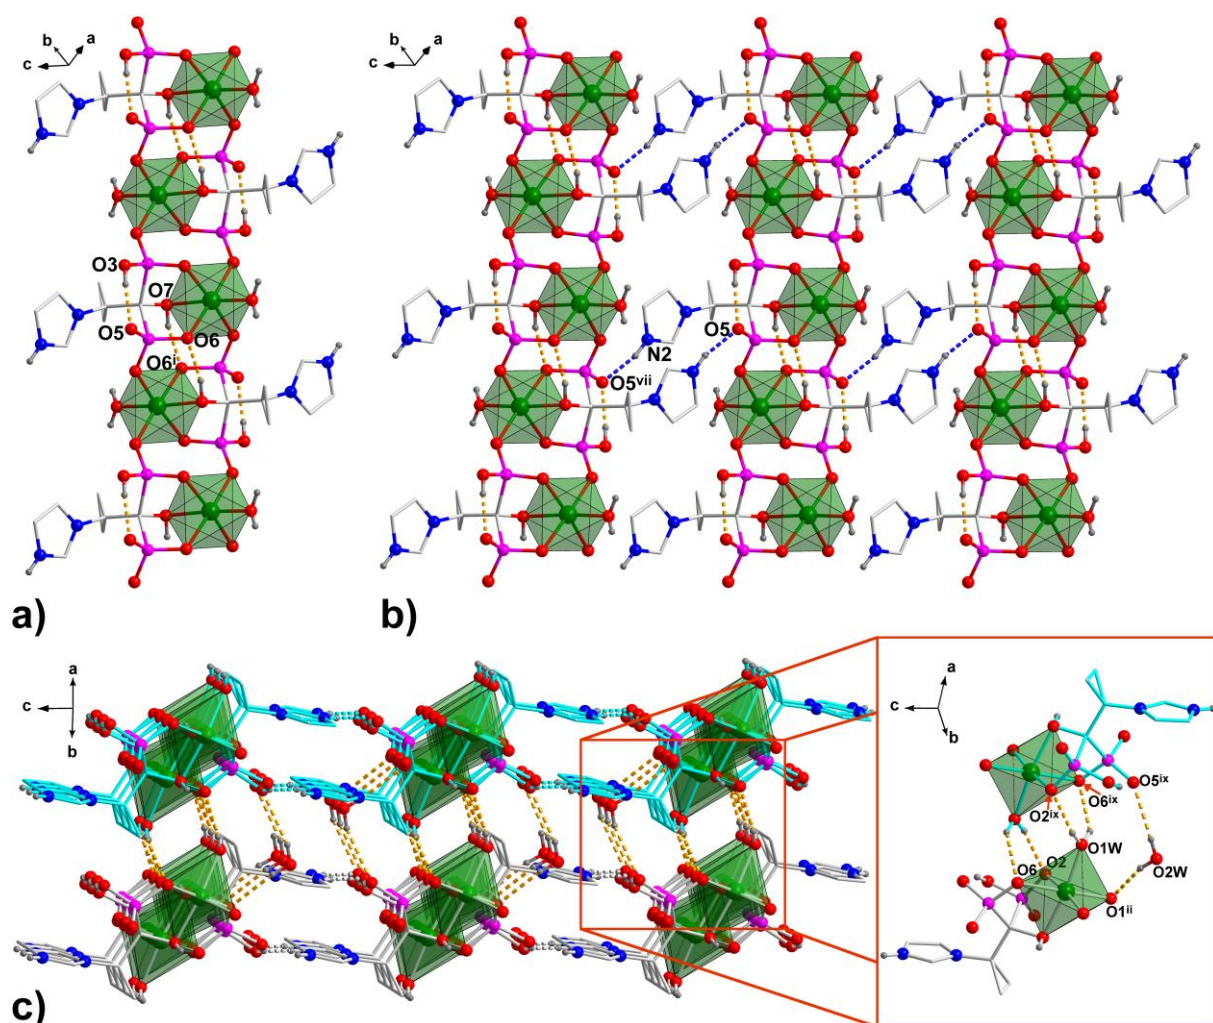

**Figure S9.** The packing diagram of the coordination polymer **1b**. (a) 1D polymeric chain running along [110] crystallographic direction; (b) Chains organized into 2D layer by N–H···O hydrogen bonds (blue dashed lines); (c) 3D supramolecular network formed through connection of adjacent layers by O–H···O hydrogen bonds (orange, dashed line) between coordinated or lattice water molecules and phosphonate O-atoms (details shown in the red frame). All C-bound H atoms not involved in the creation of hydrogen bonds and lattice water molecules (pictures a and b), are omitted for clarity. Symmetry codes are given in Table S4.

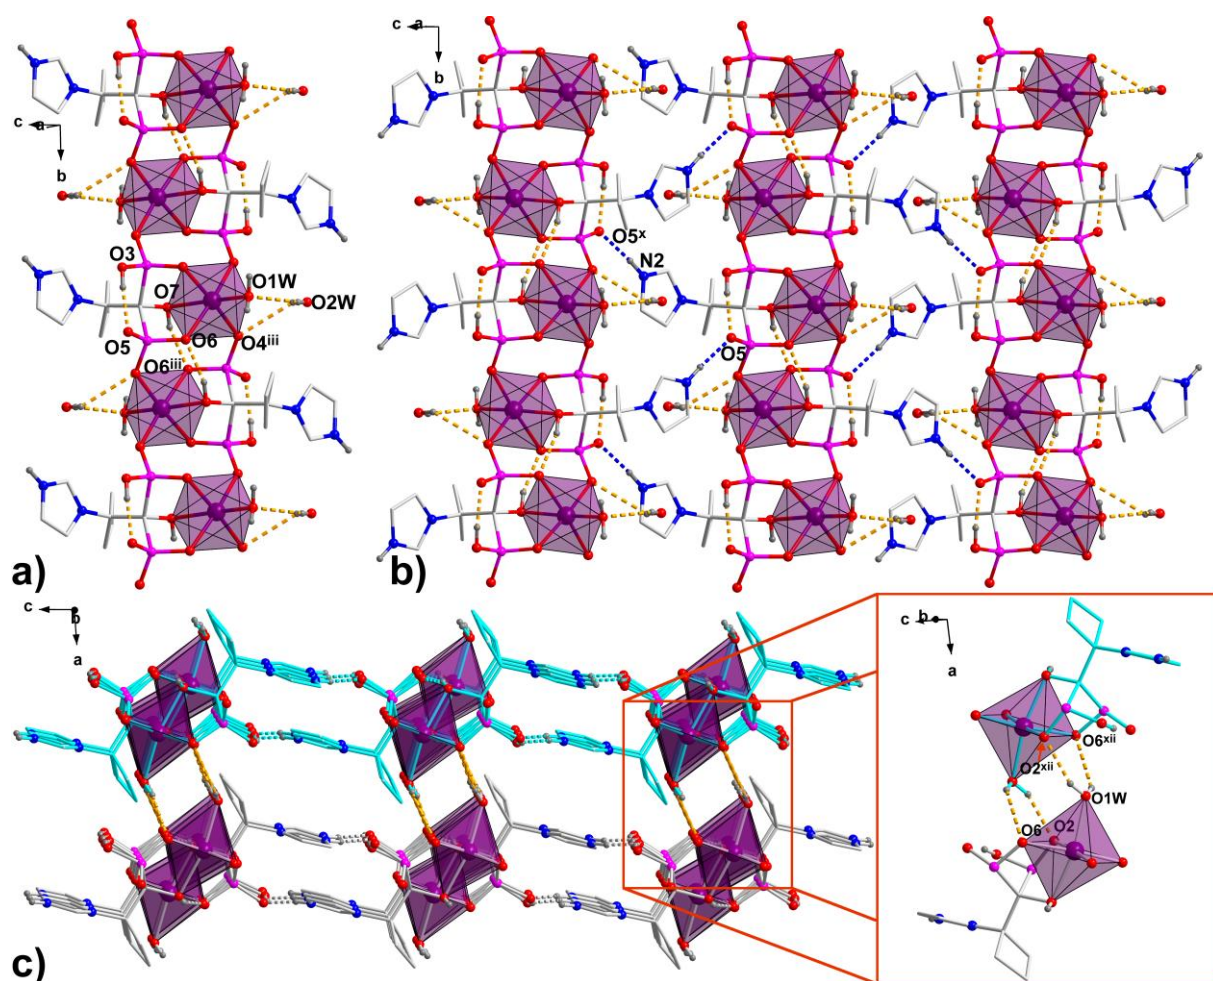

**Figure S10.** The packing diagram of the coordination polymer **2a**. (a) 1D polymeric chain running along *b* axis; (b) Chains organized into 2D layer by N–H···O hydrogen bonds (blue dashed lines); (c) 3D supramolecular network formed through connection of adjacent layers by O–H···O hydrogen bonds (orange, dashed line) between coordinated water molecules and phosphonate O-atoms (details shown in the red frame). All C-bound H atoms not involved in the creation of hydrogen bonds and lattice water molecules (picture c) are omitted for clarity. Symmetry codes are given in Table S4.

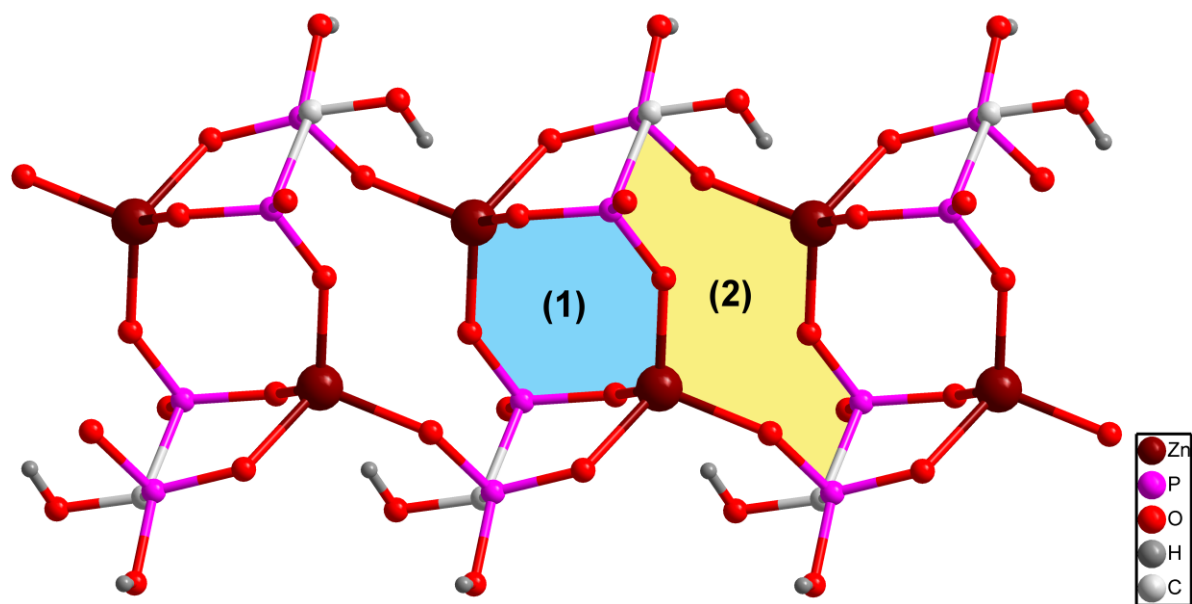

**Figure S11.** The schematic representation of the ladder chain architecture of 1D coordination polymer observed in  $[\text{Zn}(\text{H}_2\text{Ris})]$  complex (Ref. DUPXOC, Table S1). The ladder is formed by connection of the four-coordinated Zn(II) centers through O–P–O and O–P–C–P–O bridges into alternating 8- and 12-membered rings (marked as 1 and 2).

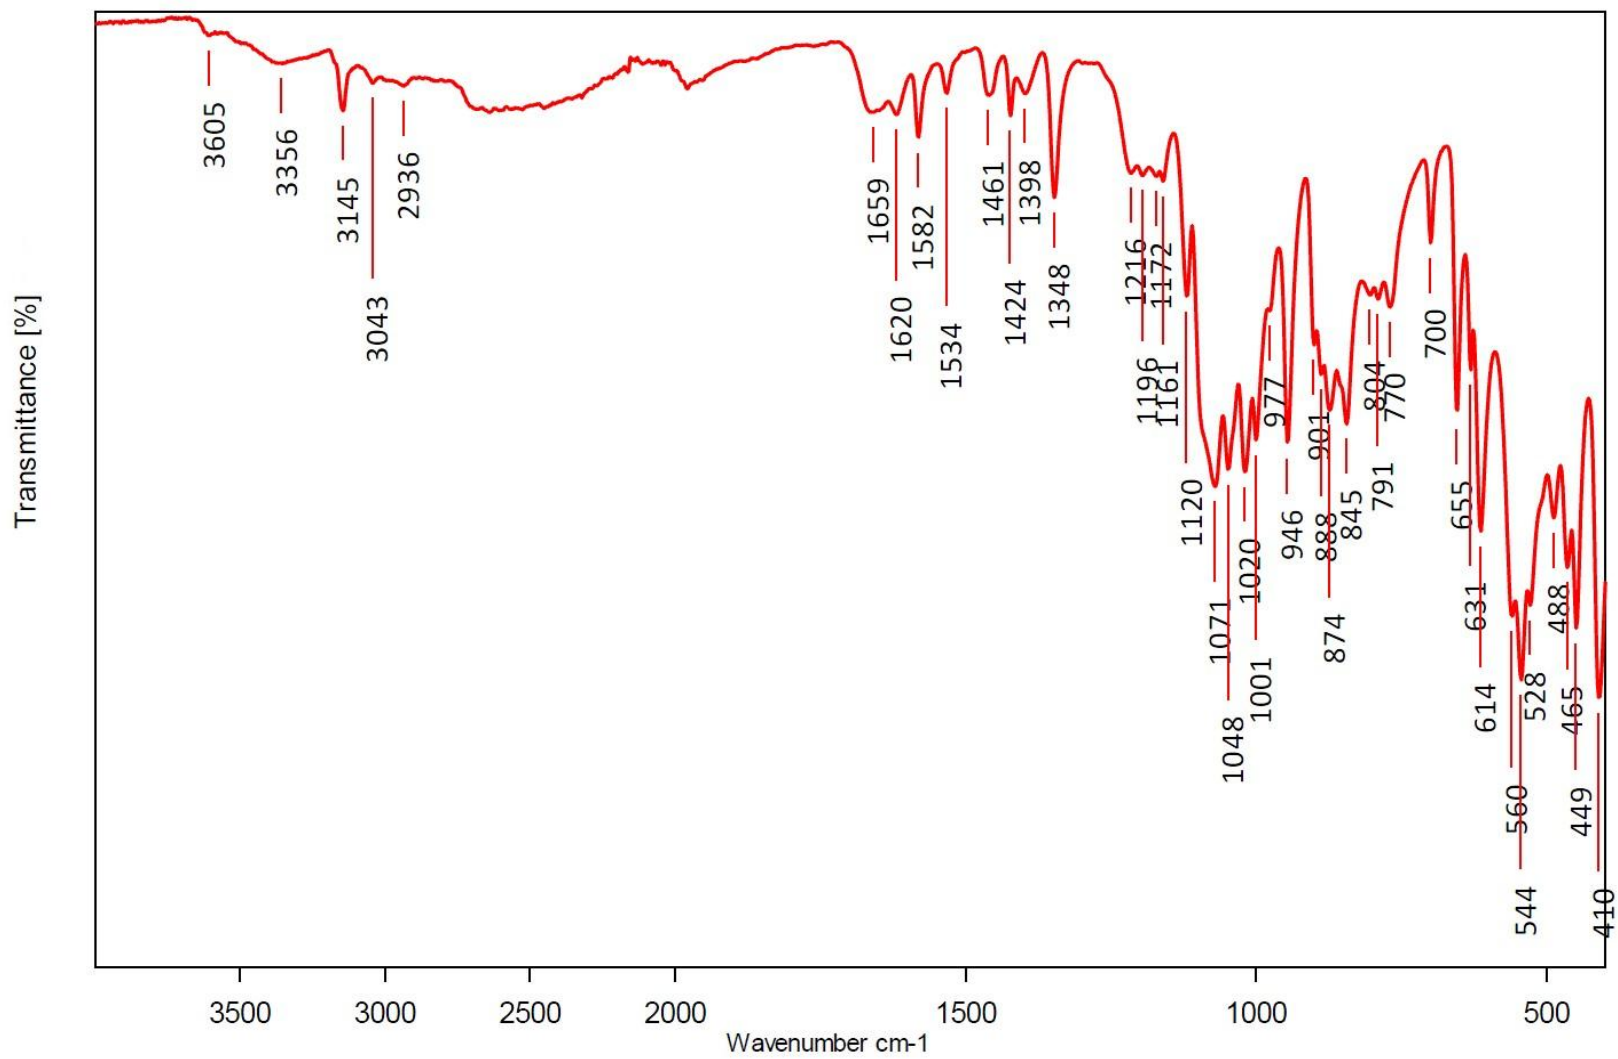

**Figure S12.** IR spectrum of **1a**.

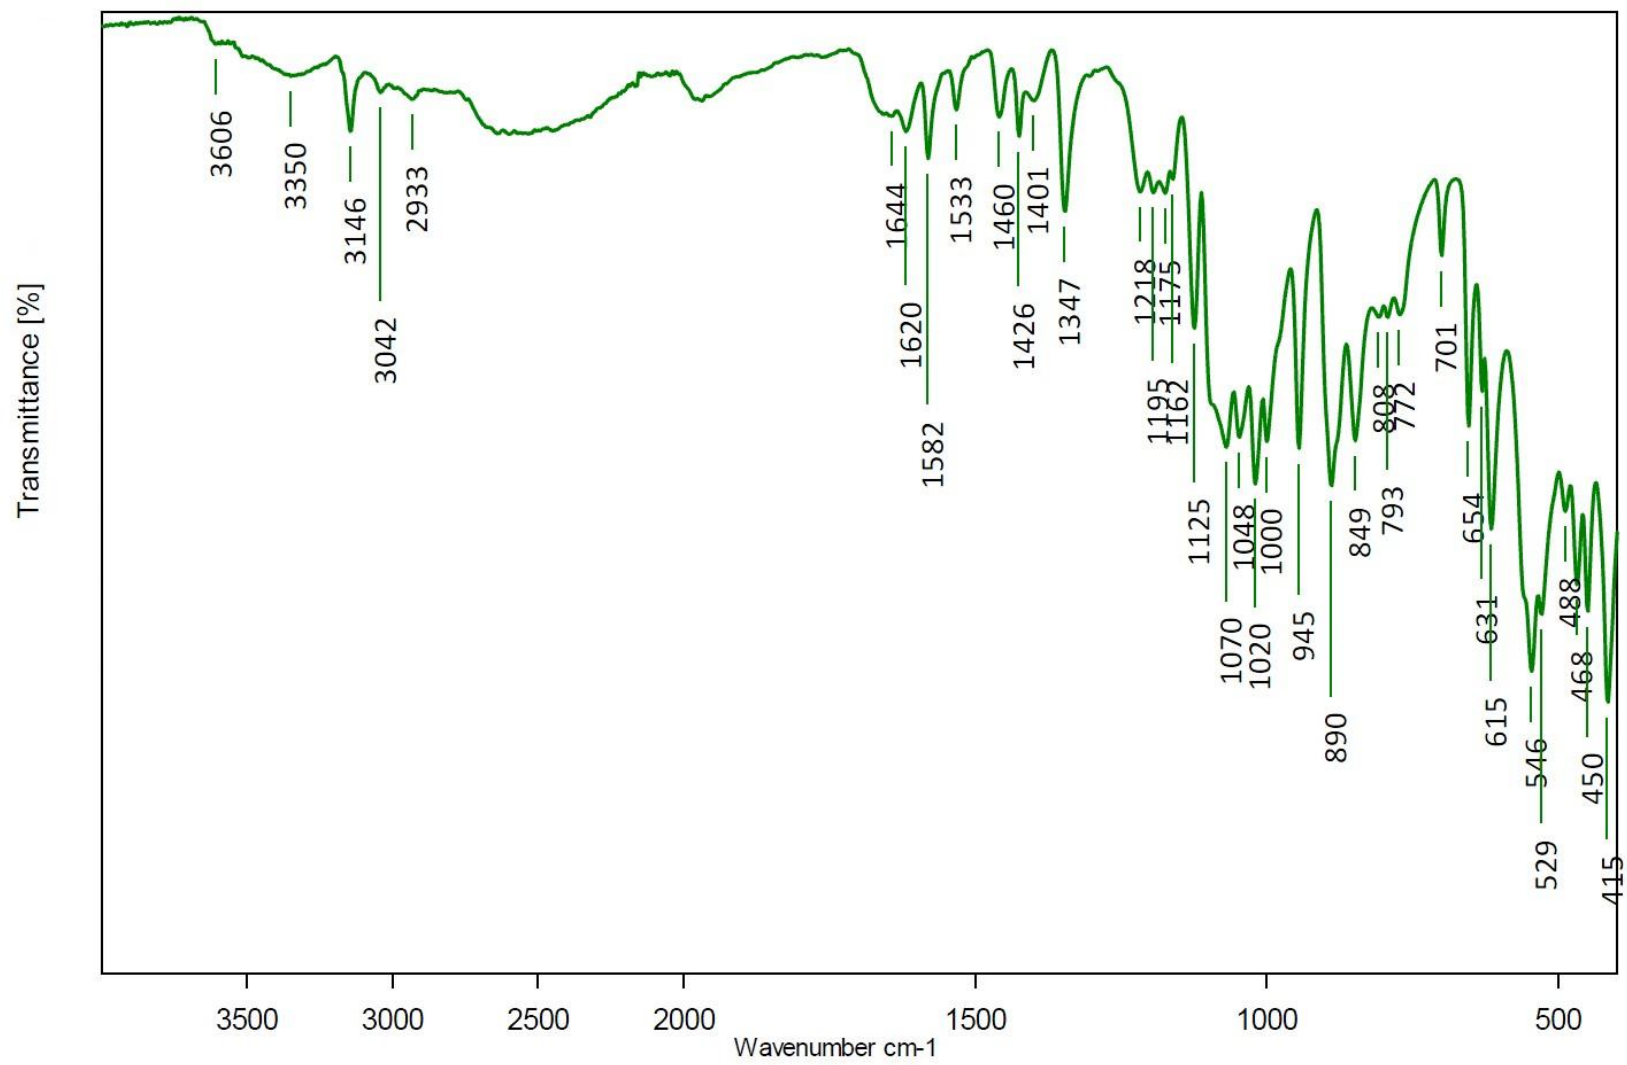

Figure S13. IR spectrum of **1b**.

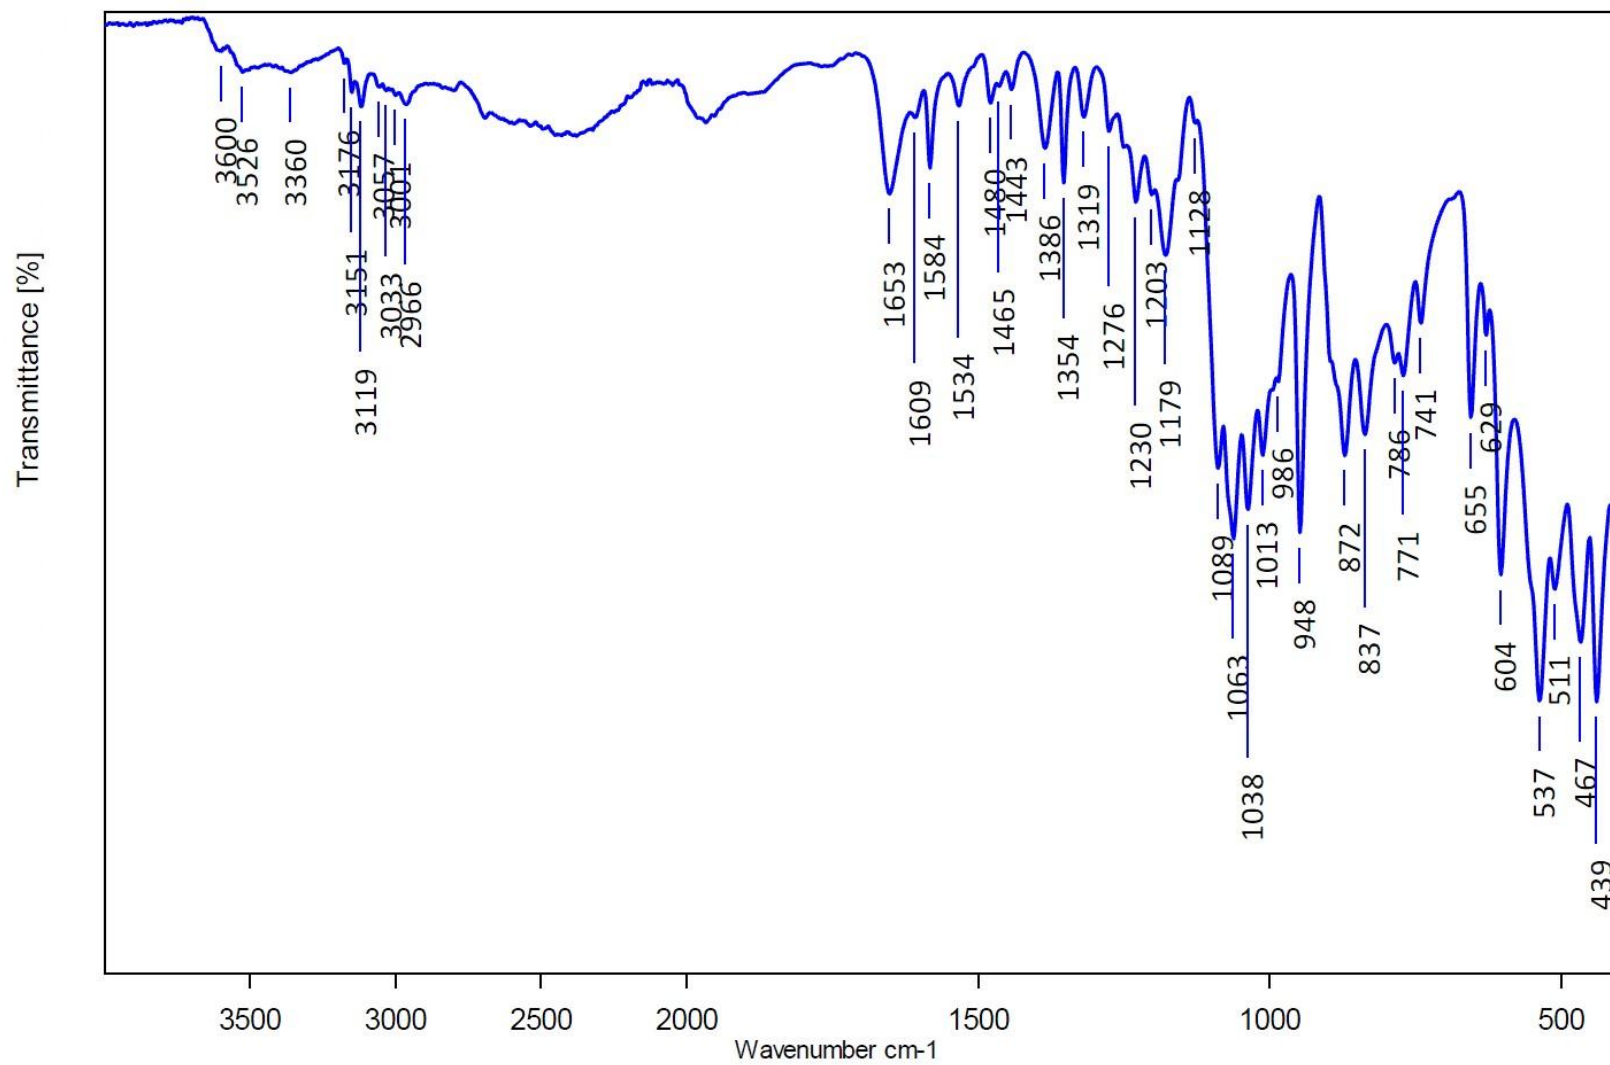

Figure S14. IR spectrum of 2a.



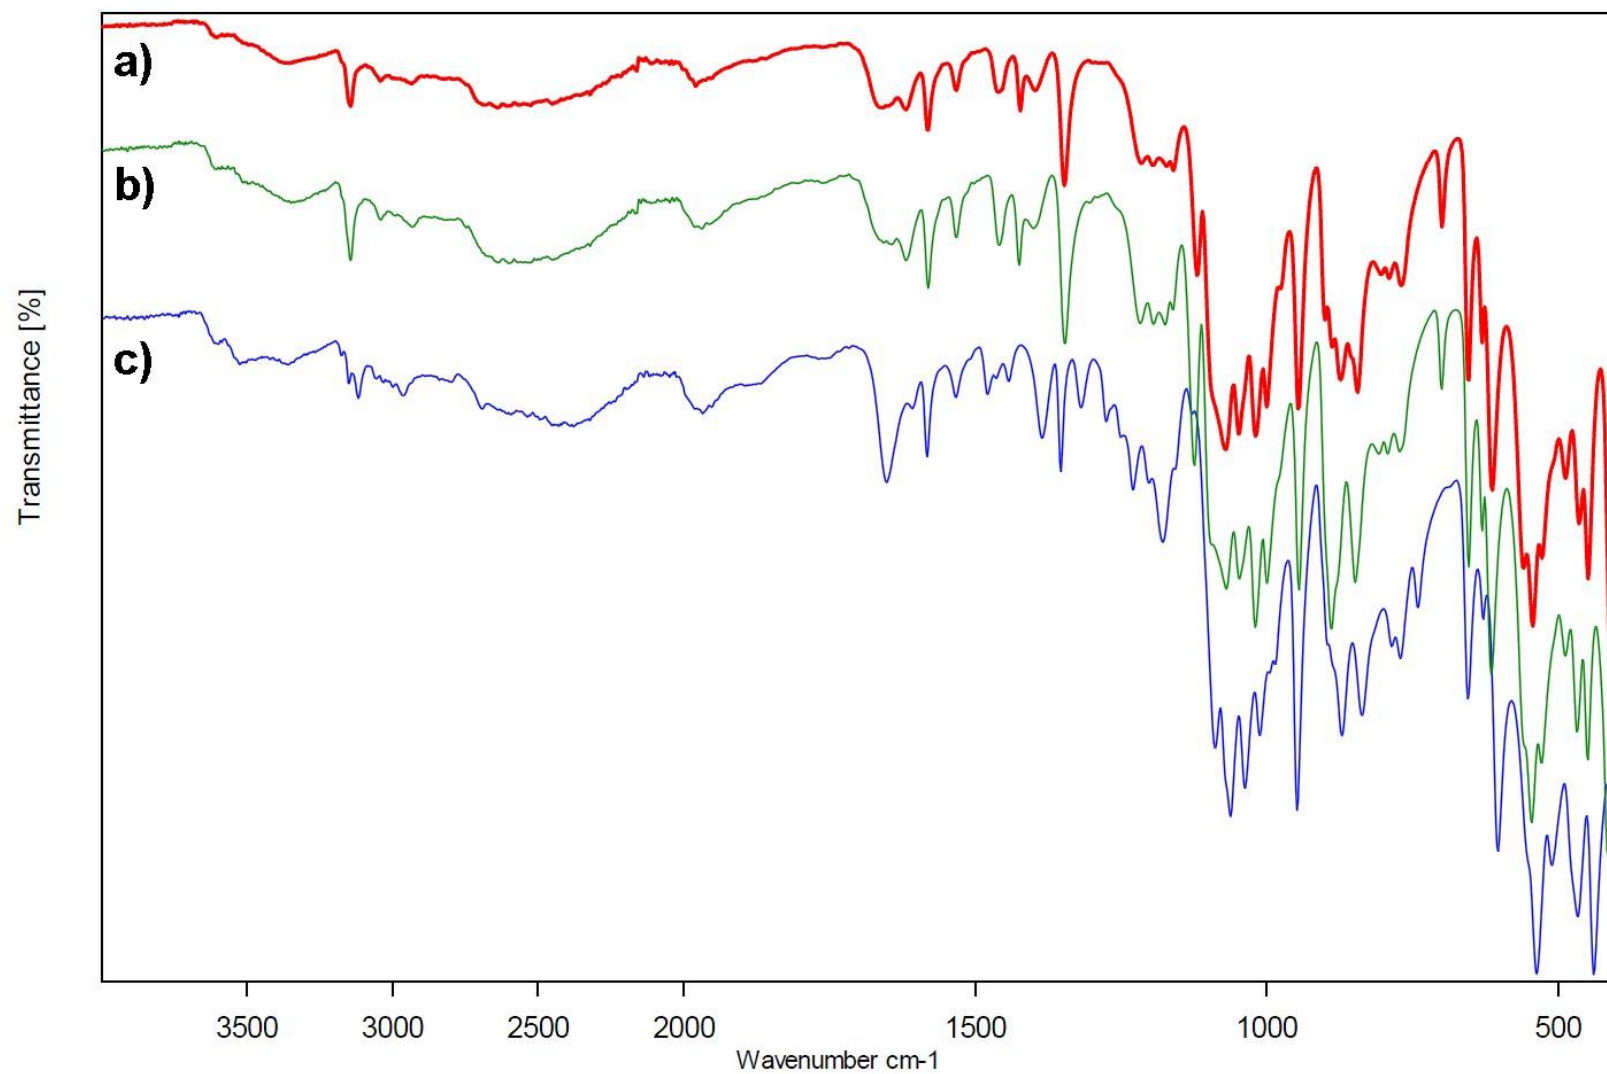

**Figure S15.** A comparison of IR spectra of (a) **1a**, (b) **1b** and (c) **2a**.

**Table S5.** Tentative assignments of the observed IR bands [ $\text{cm}^{-1}$ ] for **1a**, **1b** and **2a**.

| Wavenumber [ $\text{cm}^{-1}$ ] |              |              | Band assignment <sup>b</sup>                                                                                                      |
|---------------------------------|--------------|--------------|-----------------------------------------------------------------------------------------------------------------------------------|
| 1a                              | 1b           | 2a           |                                                                                                                                   |
| 3600-3200 br <sup>a</sup>       | 3600-3200 br | 3600-3200 br | $\nu(\text{O-H})$ (mostly $\text{O-H}\cdots\text{O}$ )<br>$\nu(\text{PO-H})$<br>$\nu(\text{N-H})/\text{im}$                       |
| 3145                            | 3146         | 3151<br>3119 | $\nu(\text{C-H})/\text{im}$                                                                                                       |
| 3043                            | 3042         | 3057<br>3033 | $\nu_{\text{s/as}}(\text{C-H})/\text{CH}_2$<br>(cyclopropyl/cyclobutyl ring)                                                      |
| 2936                            | 2933         | 3001<br>2966 |                                                                                                                                   |
| 1659                            | 1644         | 1653         | $\delta(\text{H}_2\text{O})$                                                                                                      |
| 1620                            | 1620         | 1609         |                                                                                                                                   |
| 1582                            | 1582         | 1584         | $\nu(\text{C=C})/\text{im}$ , $\nu(\text{N=C})/\text{im}$ , $\nu(\text{N-C})/\text{im}$ , $\delta(\text{C-H})/\text{im}$          |
| 1534                            | 1533         | 1534         |                                                                                                                                   |
| -                               | -            | 1480         | $\delta(\text{C-H})/\text{CH}_2$ (cyclobutyl ring)                                                                                |
| 1461                            | 1460         | 1465         | $\delta(\text{N-H})/\text{im}$ , $\nu(\text{N-C})/\text{im}$ , $\nu(\text{C-C})/\text{im}$                                        |
| 1424                            | 1426         | 1443         | $\delta(\text{C-H})/\text{CH}_2$ (cyclopropyl/cyclobutyl ring)                                                                    |
| 1398                            | 1401         | 1386         | $\delta(\text{CO-H})$                                                                                                             |
| 1348                            | 1347         | 1354<br>1319 | $\delta(\text{PO-H})$                                                                                                             |
| 1216                            | 1218         | 1276         | $\delta(\text{C-H})/\text{im}$ , $\delta(\text{N-H})/\text{im}$<br>$\delta(\text{C-H})/\text{CH}_2$ (cyclopropyl/cyclobutyl ring) |
| 1196                            | 1195         | 1230         |                                                                                                                                   |
| 1172                            | 1175         | 1203         |                                                                                                                                   |
| 1161                            | 1162         | 1179         |                                                                                                                                   |
| 1120                            | 1125         | 1128         | $\nu(\text{P=O})$                                                                                                                 |
| 1071                            | 1070         | 1089         | $\nu(\text{C-OH})$                                                                                                                |
| 1048                            | 1048         | 1063         | $\delta(\text{PO-H})$                                                                                                             |
| 1020                            | 1020         | 1038         | $\nu(\text{P=O})$                                                                                                                 |
| 1001                            | 1000         | 1013         | $\delta(\text{CO-H})$<br>$\delta(\text{C-H})/\text{CH}_2$ (cyclopropyl/cyclobutyl ring)                                           |
| 946                             |              |              |                                                                                                                                   |
| 901                             | 945          | 948          | $\nu(\text{P-O})$                                                                                                                 |
| 888                             | 890          | 872          | $\delta(\text{PO-H})$                                                                                                             |
| 874                             |              |              |                                                                                                                                   |
| 845                             | 849          | 837          | $\nu(\text{P-OH})$                                                                                                                |
| 804                             | 808          | 786          | $\nu(\text{C-P})$                                                                                                                 |
| 791                             | 793          | 771          | $\nu(\text{P-O})$                                                                                                                 |
| 770                             | 772          | 741          | $\nu(\text{P-O})$                                                                                                                 |
| 700                             | 701          | -            | $\rho_r(\text{CH}_2)/\text{cyclopropyl ring}$                                                                                     |
| 655                             | 654          | 655          | $\pi(\text{im})$                                                                                                                  |
| 631                             | 631          | 629          | $\delta(\text{C-C}) - \text{cyclopropyl/cyclobutyl ring}$                                                                         |
| 614                             | 615          | 604          |                                                                                                                                   |
| 560                             |              |              |                                                                                                                                   |
| 544                             | 546          | 537          | $\delta(\text{O-P-O})$<br>$\delta(\text{C-P})$                                                                                    |
| 528                             | 529          | 511          |                                                                                                                                   |
| 488                             | 488          | 467          |                                                                                                                                   |
| 465                             | 450          | 439          |                                                                                                                                   |
| 449                             | 415          |              |                                                                                                                                   |
| 410                             |              |              |                                                                                                                                   |

<sup>a</sup>br – broad; <sup>b</sup> $\nu_a$  – antisymmetric stretching;  $\nu_s$  – symmetric stretching;  $\delta$  – bending in-plane;  $\pi$  – bending out of plane,  $\rho_r$  – rocking.

### *Theoretical (DFT) calculations of H<sub>4</sub>cppZol ligand*

The DFT calculations were performed with the use of B3LYP [1, 2] functional corrected with dispersion correction D3 [3] (B3LYP-D3) and combined basis sets LanL2DZ [4] for P atoms in conjunction with the D95V(d,p) [5] basis set for all other atoms. The optimized structures of H<sub>4</sub>cppZol was calculated using in the optimization procedures initial geometries obtained by single crystal X-ray diffraction. Lattice water molecule has not been included in the calculations. All calculated structures correspond to energy minima on the potential energy surface, *i.e.* no imaginary frequencies. The potential energy distribution (PED) terms were calculated by the FCART06 program [6]. Normal vibrations and corresponding IR bands were characterized on the basis of PED results and additionally verified by atom displacement animation done by Chemcraft application [7]. DFT calculated results were converted into theoretical spectra using Chemcraft application with Lorentzian band shape and 10 cm<sup>-1</sup> half band width. For easier comparison of the observed and calculated band positions, scaling factors were calculated for two separate regions according to the method based on a least-squares approach [8]. All computations were carried out with Gaussian09 set of programs [9].

- [1] A. D. Becke, *J. Chem. Phys.*, 1993, **98**, 5648.
- [2] C. Lee, W. Yang and R. G. Parr, *Phys. Rev. B*, 1988, **37**, 785.
- [3] S. Grimme, J. Antony, S. Ehrlich and H. Krieg, *J. Chem. Phys.*, 2010, **132**, 154104.
- [4] P. J. Hay and W. R. Wadt, *J. Chem. Phys.*, 1985, **82**, 299.
- [5] T. H. Dunning Jr. and P. J. Hay, in *Modern Theoretical Chemistry*, Ed. H. F. Schaefer III, Vol. 3, Plenum, New York, 1976, 1.
- [6] W. B. Collier, I. Magdo and T. D. Klots, *J. Chem. Phys.*, 1999, **110**, 5710.
- [7] Chemcraft – graphical software for visualization of quantum chemistry computations. <https://www.chemcraftprog.com>
- [8] N. J. Harris, *J. Phys. Chem.*, 1995, **99**, 14689.
- [9] M. J. Frisch, G. W. Trucks, H. B. Schlegel, G. E. Scuseria, M. A. Robb, J. R. Cheeseman, G. Scalmani, V. Barone, B. Mennucci, G. A. Petersson, H. Nakatsuji, M. Caricato, X. Li, H. P. Hratchian, A. F. Izmaylov, J. Bloino, G. Zheng, J. L. Sonnenberg, M. Hada, M. Ehara, K. Toyota, R. Fukuda, J. Hasegawa, M. Ishida, T. Nakajima, Y. Honda, O. Kitao, H. Nakai, T. Vreven, J. A. Montgomery, Jr., J. E. Peralta, F. Ogliaro, M. Bearpark, J. J. Heyd, E. Brothers, K. N. Kudin, V. N. Staroverov, R. Kobayashi, J. Normand, K. Raghavachari, A. Rendell, J. C. Burant, S. S. Iyengar, J. Tomasi, M. Cossi, N. Rega, J. M. Millam, M. Klene, J. E. Knox, J. B.

Cross, V. Bakken, C. Adamo, J. Jaramillo, R. Gomperts, R. E. Stratmann, O. Yazyev, A. J. Austin, R. Cammi, C. Pomelli, J. W. Ochterski, R. L. Martin, K. Morokuma, V. G. Zakrzewski, G. A. Voth, P. Salvador, J. J. Dannenberg, S. Dapprich, A. D. Daniels, O. Farkas, J. B. Foresman, J. V. Ortiz, J. Cioslowski and D. J. Fox, Gaussian, Inc., Wallingford CT, 2009.

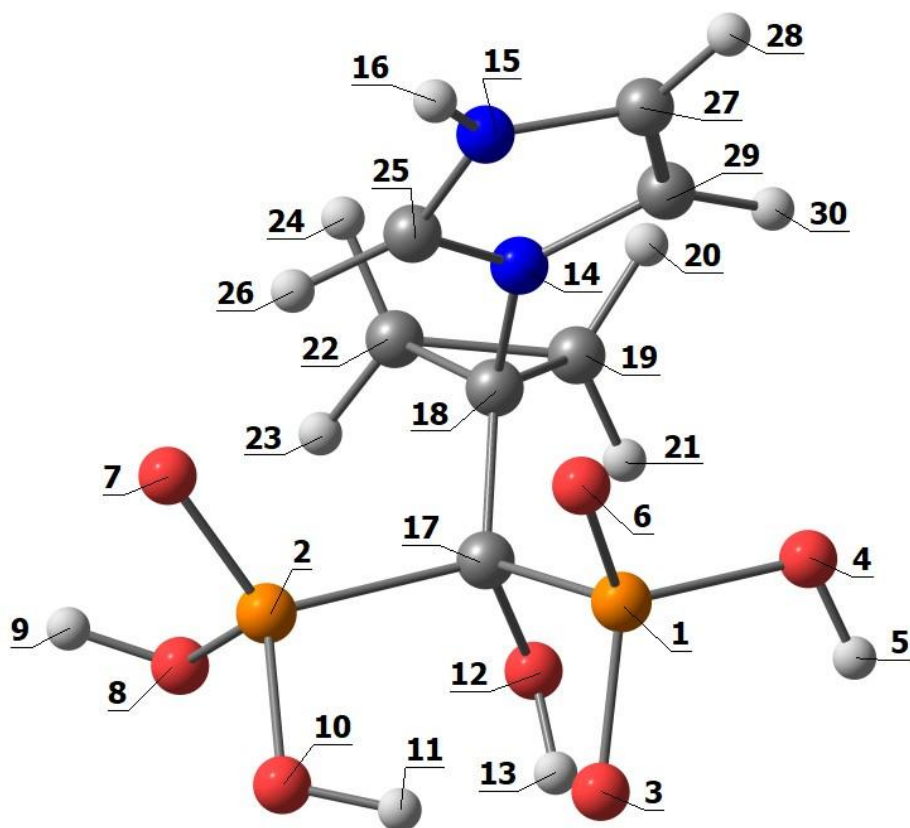

**Figure S16.** Optimized molecular geometry and the atom-numbering scheme of H<sub>4</sub>cppZol ligand.

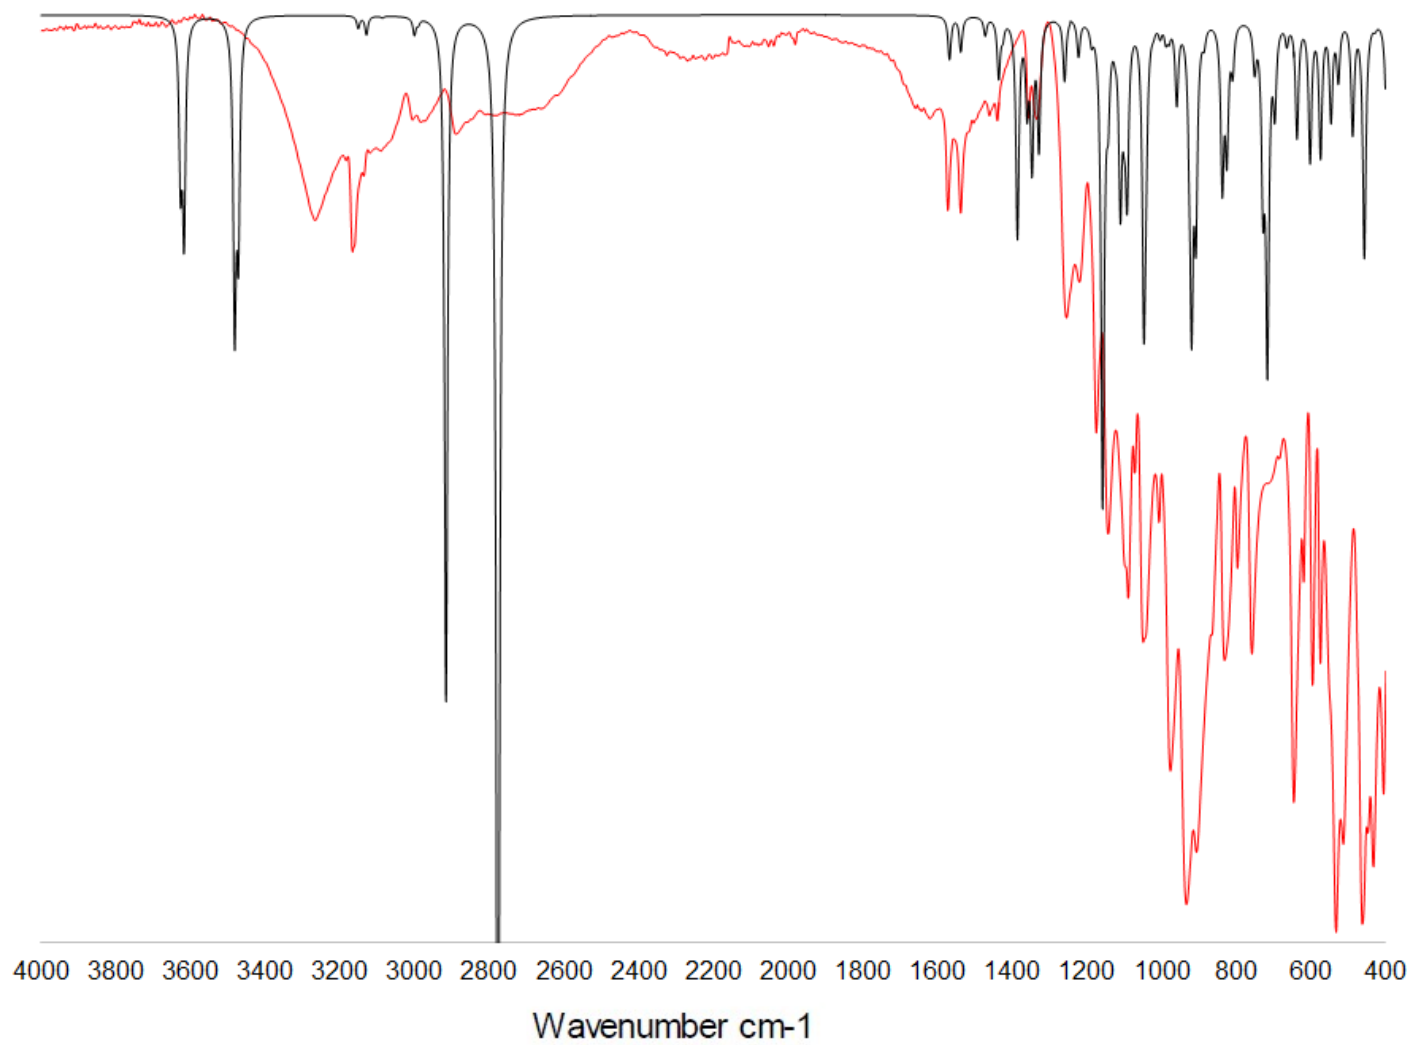

**Figure S17.** Comparison of experimental and the corresponding theoretical FT-IR spectrum (red and black line, respectively) of H<sub>4</sub>cppZol ligand.

**Table S6.** Frequencies of theoretical and experimental IR bands and their vibrational assignments for H<sub>4</sub>cppZol ligand.

| No. | Calcd <sup>a</sup><br>ν [cm <sup>-1</sup> ] | Exp.<br>ν [cm <sup>-1</sup> ] | General assignment <sup>b,c</sup>         | Functional group                    | PED <sup>d</sup>                                                               |
|-----|---------------------------------------------|-------------------------------|-------------------------------------------|-------------------------------------|--------------------------------------------------------------------------------|
| 1.  | 3625                                        | 3265 br                       | v(O-H)                                    | phosphonate PO-H                    | v(O4-H5)(99)                                                                   |
| 2.  | 3615                                        |                               | v(O-H)                                    | phosphonate PO-H                    | v(O8-H9)(99)                                                                   |
| 3.  | 3479                                        |                               | v(N-H)                                    | imidazole                           | v(N15-H16)(99)                                                                 |
| 4.  | 3470                                        |                               | v(O-H)                                    | hydroxyl CO-H                       | v(O12-H13)(71)                                                                 |
| 6.  | 3149                                        | 3165                          | v(C-H)                                    | imidazole                           | v(C29-H30)(70), v(C27-H28)(28)                                                 |
| 7.  | 3127                                        | 3135                          | v(C-H)                                    | imidazole                           | v(C27-H28)(71), v(C29-H30)(28)                                                 |
| 8.  | 3100                                        | 3119                          | v <sub>as</sub> (C-H)                     | -CH <sub>2</sub> -                  | v(C19-H21)(60), v(C19-H20)(27), v(C22-H23)(6), v(C22-H24)(5)                   |
| 9.  | 3084                                        | 3089                          |                                           |                                     | v(C22-H23)(51), v(C22-H24)(36), v(C19-H21)(9), v(C19-H20)(4)                   |
| 10. | 2999                                        | 3004                          | v <sub>s</sub> (C-H)                      |                                     | v(C19-H20)(67), v(C19-H21)(29)                                                 |
| 11. | 2988                                        | 2982                          |                                           |                                     | v(C22-H24)(57), v(C22-H23)(40)                                                 |
| 12. | 2914                                        | 2889                          | v(C-H)                                    | imidazole                           | v(C25-H26)(96)                                                                 |
| 13. | 2775                                        | n.o.                          | v(O-H)                                    | phosphonate PO-H                    | v(O10-H11)(90)                                                                 |
| 14. | 1567                                        | 1571                          | v(C=C), v(C=N), v(C=N)                    | imidazole                           | v(C27-C29)(81), v(C25-N15)(7), v(C25-N14)(6)                                   |
| 15. | 1537                                        | 1537                          | v(C=N), v(C=N), δ(im)                     |                                     | v(C25-N15)(41), v(C25-N14)(22), δ(H16-N15-C27)(12), δ(N15-C27-H16)(6)          |
| 16. | 1471                                        | 1460                          | ρ <sub>s</sub> (CH <sub>2</sub> )         | -CH <sub>2</sub> -                  | δ(H23-C22-H24)(17), δ(H20-C19-H21)(13)                                         |
| 17. | 1434                                        | 1439                          | v(C=N), v(C=N), v(C=C)                    | imidazole                           | v(C27-C29)(28), v(C25-N15)(27), v(C27-N15)(25), v(C25-N14)(9)                  |
| 18. | 1346                                        | 1356                          | δ(COH), v(C-N)                            | hydroxyl C-O-H,<br>imidazole        | δ(C17-O12-H13)(20), v(C29-N14)(16), v(C25-N14)(13), v(C17-C18)(8)              |
| 19. | 1327                                        | 1334                          | v(skel), v(C-N)                           | skeletal vib.,<br>imidazole         | v(C18-N14)(37), v(C29-N14)(11), v(C25-N15)(8), v(C17-C18)(5)                   |
| 20. | 1272                                        | 1254                          | δ(COH), v(skel)                           | hydroxyl C-O-H,<br>skeletal vib.    | δ(C17-O12-H13)(24), v(C17-C18)(17), v(C18-C19)(7), v(C18-C22)(7)               |
| 21. | 1221                                        | 1220                          | v(C-N), ρ <sub>w</sub> (CH <sub>2</sub> ) | imidazole, -CH <sub>2</sub> -       | v(C25-N15)(17), v(C29-N14)(9), δ(C18-C22-H23)(7), δ(C18-C19-H21)(6)            |
| 22. | 1186                                        | 1174                          | δ(im)                                     | imidazole                           | δ(N15-C25-H26)(49), δ(N14-C25-H26)(27), δ(H16-N15-C27)(7), δ(H16-N15-C25)(7)   |
| 23. | 1156                                        | 1143                          | v(P=O), δ(POH)                            | phosphonate P=O,<br>P-O-H           | v(P1-O6)(46), δ(P1-O4-H5)(25), v(P1-O3)(11)                                    |
| 24. | 1141                                        |                               |                                           |                                     | δ(P2-O8-H9)(36), v(P2-O7)(12), v(C17-O12)(9)                                   |
| 25. | 1109                                        | 1089                          | v(C-O), δ(POH)                            | hydroxyl C-OH,<br>phosphonate P-O-H | v(C17-O12)(34), δ(P2-O8-H9)(16), δ(C18-C22-H23)(9)                             |
| 26. | 1090                                        | 1071                          | ρ <sub>w</sub> (CH <sub>2</sub> )         | -CH <sub>2</sub> -                  | δ(C18-C22-H24)(17), δ(C18-C22-H23)(15), δ(C19-C22-H24)(14), δ(C19-C22-H23)(13) |
| 27. | 1046                                        | 1049                          | v(P=O), δ(POH)                            | phosphonate P=O,<br>P-O-H           | δ(P1-O4-H5)(52), v(P1-O6)(16), v(P2-O7)(16)                                    |
| 28. | 1003                                        | 1006                          | δ <sub>ring</sub> (im)                    | imidazole                           | δ(C27-C29-H30)(23), δ(N15-C25-H26)(20), δ(N14-C29-C27)(11), δ(N14-C25-N15)(7)  |

|     |     |     |                                                             |                                    |                                                                                                                                                                                               |
|-----|-----|-----|-------------------------------------------------------------|------------------------------------|-----------------------------------------------------------------------------------------------------------------------------------------------------------------------------------------------|
| 29. | 987 | 976 | $\nu(\text{C}-\text{C}), \delta_{\text{ring}}(\text{cycl})$ | $-\text{CH}_2-\text{CH}_2-$        | $\nu(\text{C18}-\text{C22})(13), \nu(\text{C18}-\text{C19})(11), \delta(\text{P2}-\text{C17}-\text{C18})(10), \delta(\text{C18}-\text{C19}-\text{C22})(7)$                                    |
| 30. | 979 |     | $\rho_t(\text{CH}_2)$                                       | $-\text{CH}_2-$                    | $\delta(\text{C18}-\text{C22}-\text{H24})(21), \delta(\text{C18}-\text{C19}-\text{H20})(16), \delta(\text{C18}-\text{C19}-\text{H21})(14), \delta(\text{C18}-\text{C22}-\text{H23})(13)$      |
| 31. | 924 | 933 | $\delta_{\text{ring}}(\text{im})$                           | imidazole                          | $\delta(\text{C25}-\text{N15}-\text{C27})(28), \delta(\text{N14}-\text{C29}-\text{C27})(19), \delta(\text{N14}-\text{C25}-\text{N15})(18), \delta(\text{N15}-\text{C27}-\text{C29})(14)$      |
| 32. | 918 | 906 | $\nu(\text{P}-\text{O}), \delta_{\text{ring}}(\text{im})$   | phosphonate P-O,<br>imidazole      | $\nu(\text{P1}-\text{O3})(24), \delta(\text{N14}-\text{C25}-\text{N15})(15), \delta(\text{C25}-\text{N15}-\text{C27})(9), \nu(\text{P1}-\text{O6})(8)$                                        |
| 33. | 836 | 831 | $\nu(\text{P}-\text{O})$                                    | phosphonate P-OH                   | $\nu(\text{P2}-\text{O10})(41), \nu(\text{P2}-\text{O8})(21)$                                                                                                                                 |
| 34. | 824 |     | $\nu(\text{P}-\text{C})$                                    | phosphonate P-C                    | $\nu(\text{P2}-\text{C17})(16), \nu(\text{P1}-\text{C17})(14), \delta(\text{P2}-\text{C17}-\text{C18})(10), \nu(\text{P2}-\text{O10})(7)$                                                     |
| 35. | 808 | 796 | $\rho_r(\text{CH}_2)$                                       | $-\text{CH}_2-$                    | $\delta(\text{H20}-\text{C19}-\text{C22})(31), \delta(\text{H21}-\text{C19}-\text{C22})(28), \delta(\text{C19}-\text{C22}-\text{H24})(26), \delta(\text{C19}-\text{C22}-\text{H23})(24)$      |
| 36. | 750 | 758 | $\nu(\text{P}-\text{O})$                                    | phosphonate P-OH                   | $\nu(\text{P2}-\text{O8})(33), \nu(\text{P1}-\text{O4})(17), \nu(\text{P2}-\text{O10})(5)$                                                                                                    |
| 37. | 715 | 710 |                                                             |                                    | $\nu(\text{P1}-\text{O4})(45), \nu(\text{P2}-\text{O8})(7)$                                                                                                                                   |
| 38. | 663 | 684 | $\tau(\text{im})$                                           | imidazole                          | $\tau(\text{N14}-\text{C25}-\text{N15}-\text{C27})(28), \tau(\text{C17}-\text{C18}-\text{N14}-\text{C25})(17), \tau(\text{N14}-\text{C29}-\text{C27}-\text{N15})(11)$                         |
| 39. | 636 | 646 |                                                             |                                    | $\tau(\text{N14}-\text{C29}-\text{C27}-\text{N15})(64), \tau(\text{C29}-\text{C27}-\text{N15}-\text{C25})(11), \tau(\text{N14}-\text{C25}-\text{N15}-\text{C27})(4)$                          |
| 40. | 601 | 595 |                                                             |                                    | $\tau(\text{N14}-\text{C25}-\text{N15}-\text{C27})(49), \tau(\text{N14}-\text{C29}-\text{C27}-\text{N15})(26), \tau(\text{C29}-\text{C27}-\text{N15}-\text{C25})(16)$                         |
| 41. | 573 | 575 | $\delta(\text{COH})$                                        | hydroxyl C-O-H                     | $\delta(\text{C17}-\text{O12}-\text{H13})(53)$                                                                                                                                                |
| 42. | 545 | 533 | $\tau(\text{skel}), \delta(\text{skel})$                    | skeletal vib.                      | $\tau(\text{N14}-\text{C18}-\text{C17}-\text{P1})(17), \delta(\text{C18}-\text{N14}-\text{C29})(11), \delta(\text{P2}-\text{C17}-\text{C18})(7), \delta(\text{C18}-\text{N14}-\text{C25})(5)$ |
| 43. | 526 | 513 |                                                             |                                    | $\delta(\text{C18}-\text{N14}-\text{C25})(12), \tau(\text{N14}-\text{C18}-\text{C17}-\text{P1})(9), \delta(\text{C18}-\text{N14}-\text{C29})(8), \nu(\text{C17}-\text{P2})(7)$                |
| 44. | 487 | 462 | $\delta(\text{OPO}), \delta(\text{skel})$                   | phosphonate O-P-O<br>skeletal vib. | $\delta(\text{O6}-\text{P1}-\text{C17})(14), \delta(\text{P1}-\text{C17}-\text{C18})(9), \delta(\text{C18}-\text{N14}-\text{C25})(5), \delta(\text{O3}-\text{P1}-\text{O4})(5)$               |
| 45. | 456 | 433 |                                                             |                                    | $\delta(\text{O7}-\text{P2}-\text{C17})(6), \delta(\text{O7}-\text{P2}-\text{O10})(6), \delta(\text{C18}-\text{N14}-\text{C29})(6)$                                                           |
| 46. | 396 | 405 |                                                             |                                    | $\delta(\text{O3}-\text{P1}-\text{O6})(22), \delta(\text{O12}-\text{C17}-\text{C18})(12), \delta(\text{C18}-\text{N14}-\text{C25})(7), \delta(\text{O3}-\text{P1}-\text{O4})(5)$              |

<sup>a</sup>Scaling factors for the calculated harmonic frequencies: 0.946 for modes 1-13, 0.973 for modes 14-20, 1.000 for modes 21-46. <sup>b</sup>Abbreviations: br – broad,  $\nu$  – stretching,  $\delta$  – in-plane bending,  $\rho_s$  – scissoring,  $\rho_w$  – wagging,  $\rho_t$  – twisting,  $\rho_r$  – rocking,  $\tau$  – torsion. Subscripts: as – antisymmetric; s – symmetric. <sup>c</sup>Vibrational bands assignment for the most characteristic functional groups based on the significant contribution in the potential energy distribution. <sup>d</sup>The PED values are listed if a contributor is among the top four and is  $\geq 4\%$ .

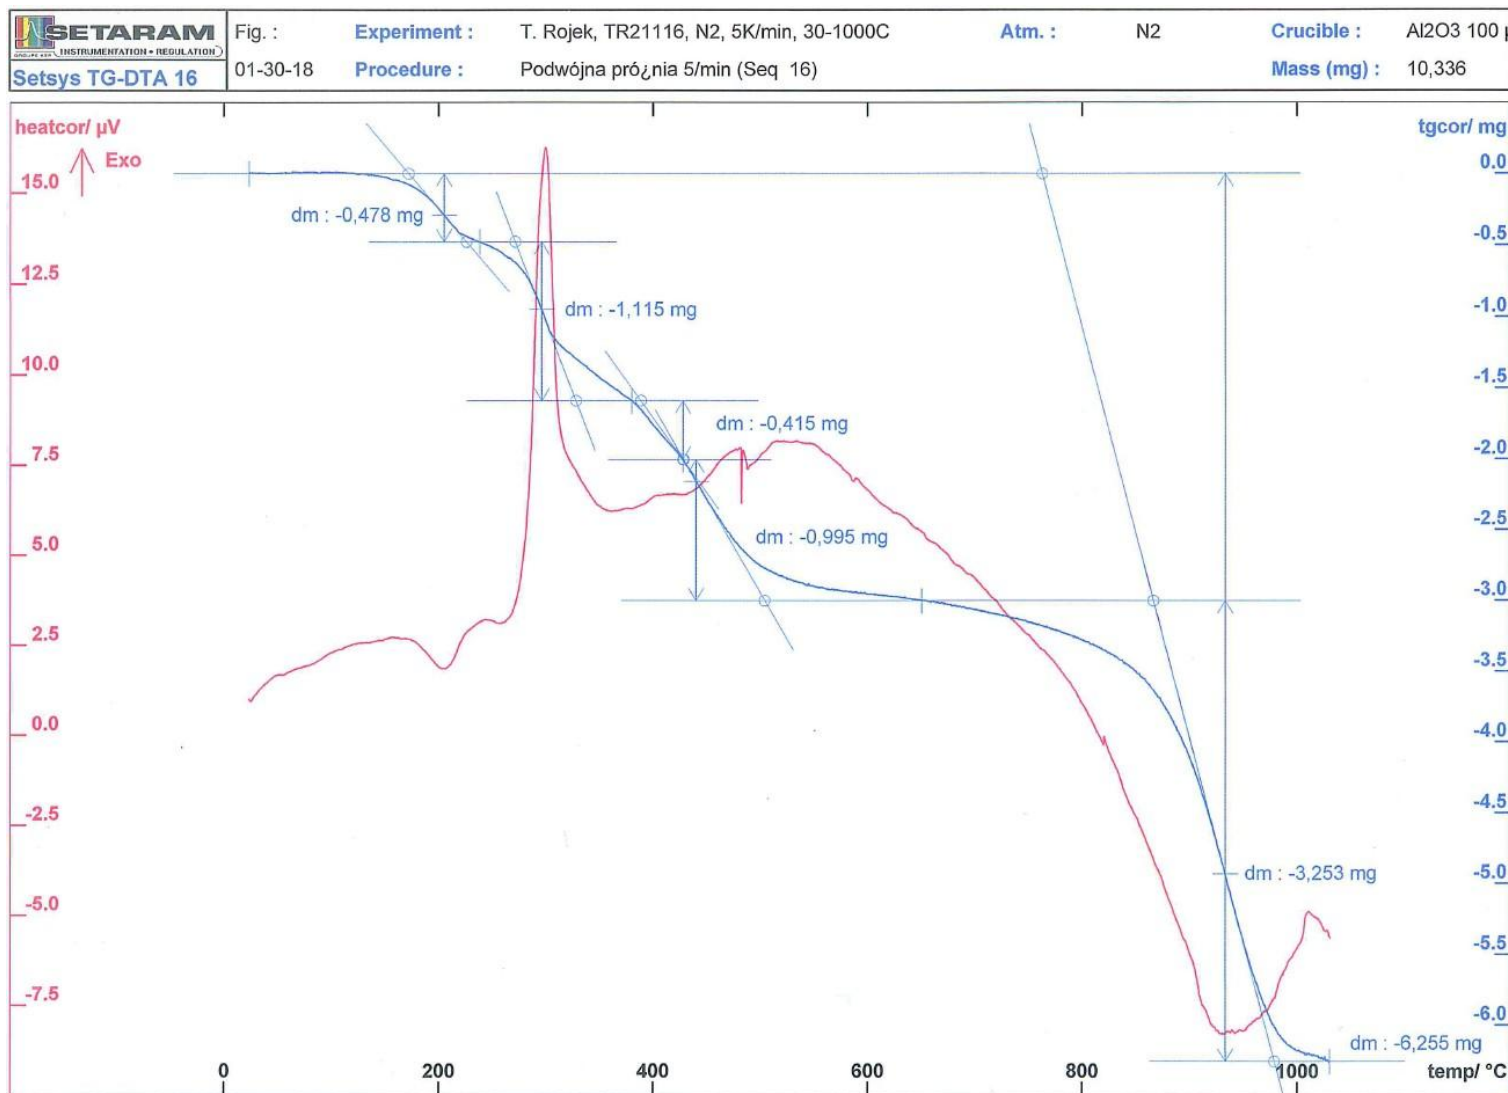

**Figure S18.** TG-DTA plot for the  $\text{Co}(\text{H}_2\text{cppZol})(\text{H}_2\text{O}) \cdot 2\text{H}_2\text{O}$  complex (1a).



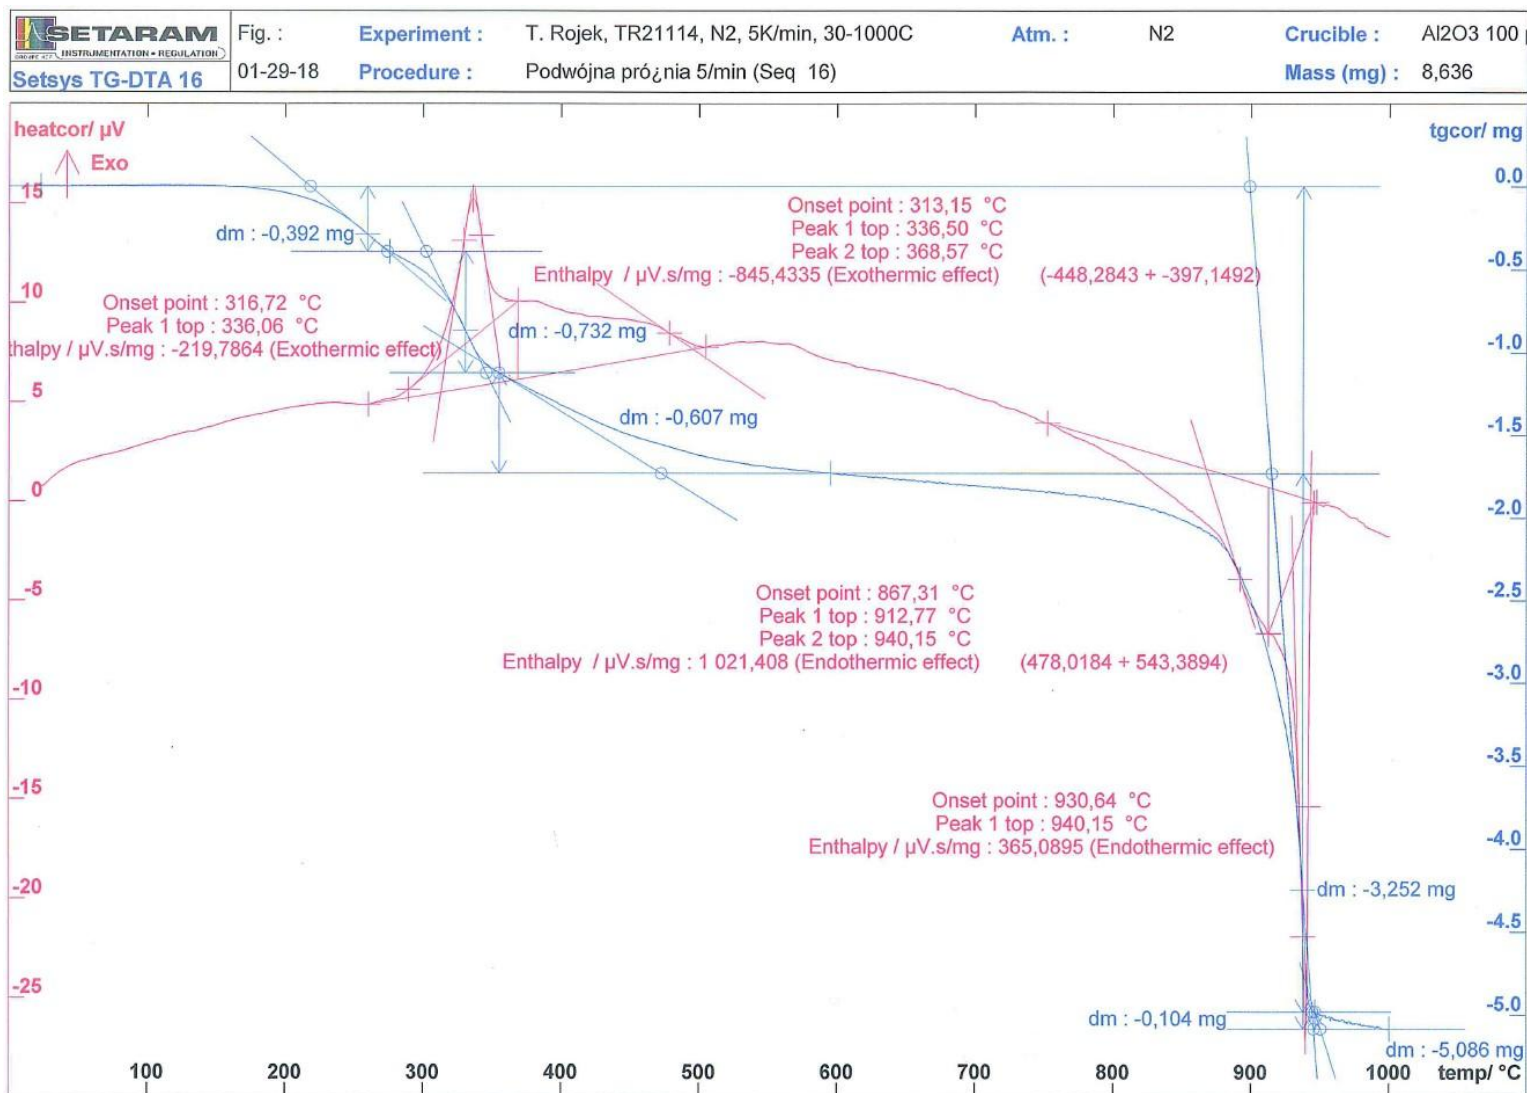

Figure S19. TG-DTA plot for the Ni(H<sub>2</sub>cppZol)(H<sub>2</sub>O)·2H<sub>2</sub>O complex (1b).

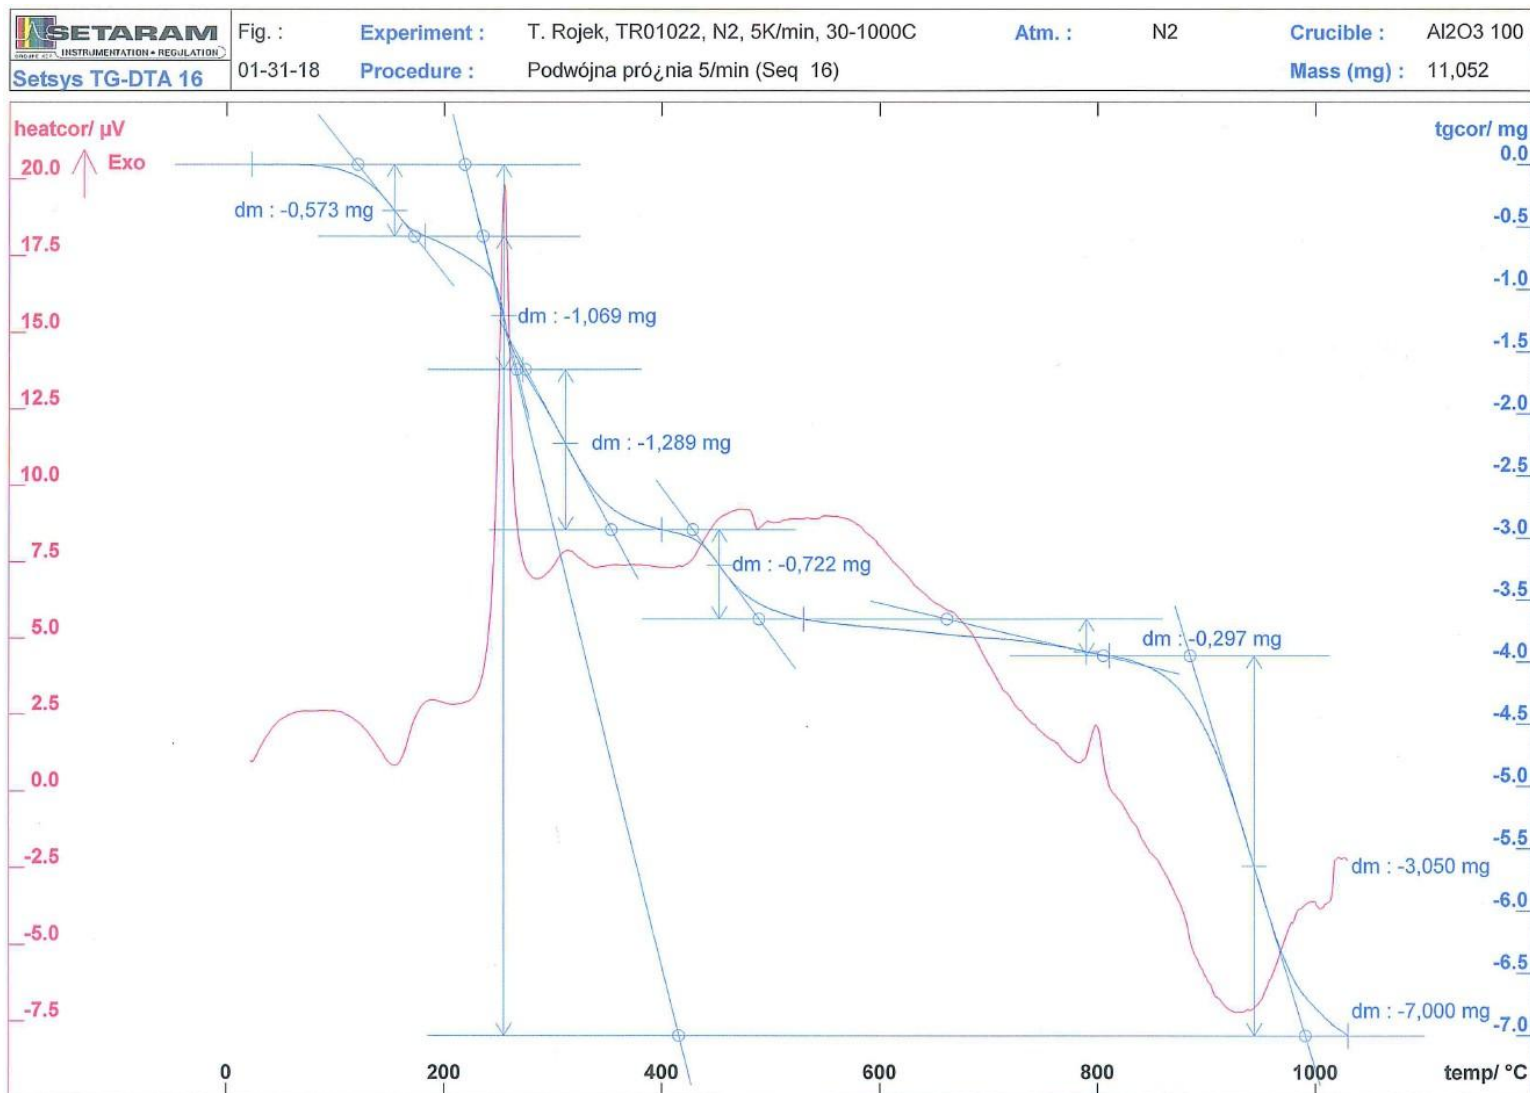

Figure S20. TG-DTA plot for the  $\text{Co}(\text{H}_2\text{cbtZol})(\text{H}_2\text{O}) \cdot 2\text{H}_2\text{O}$  complex (2a).

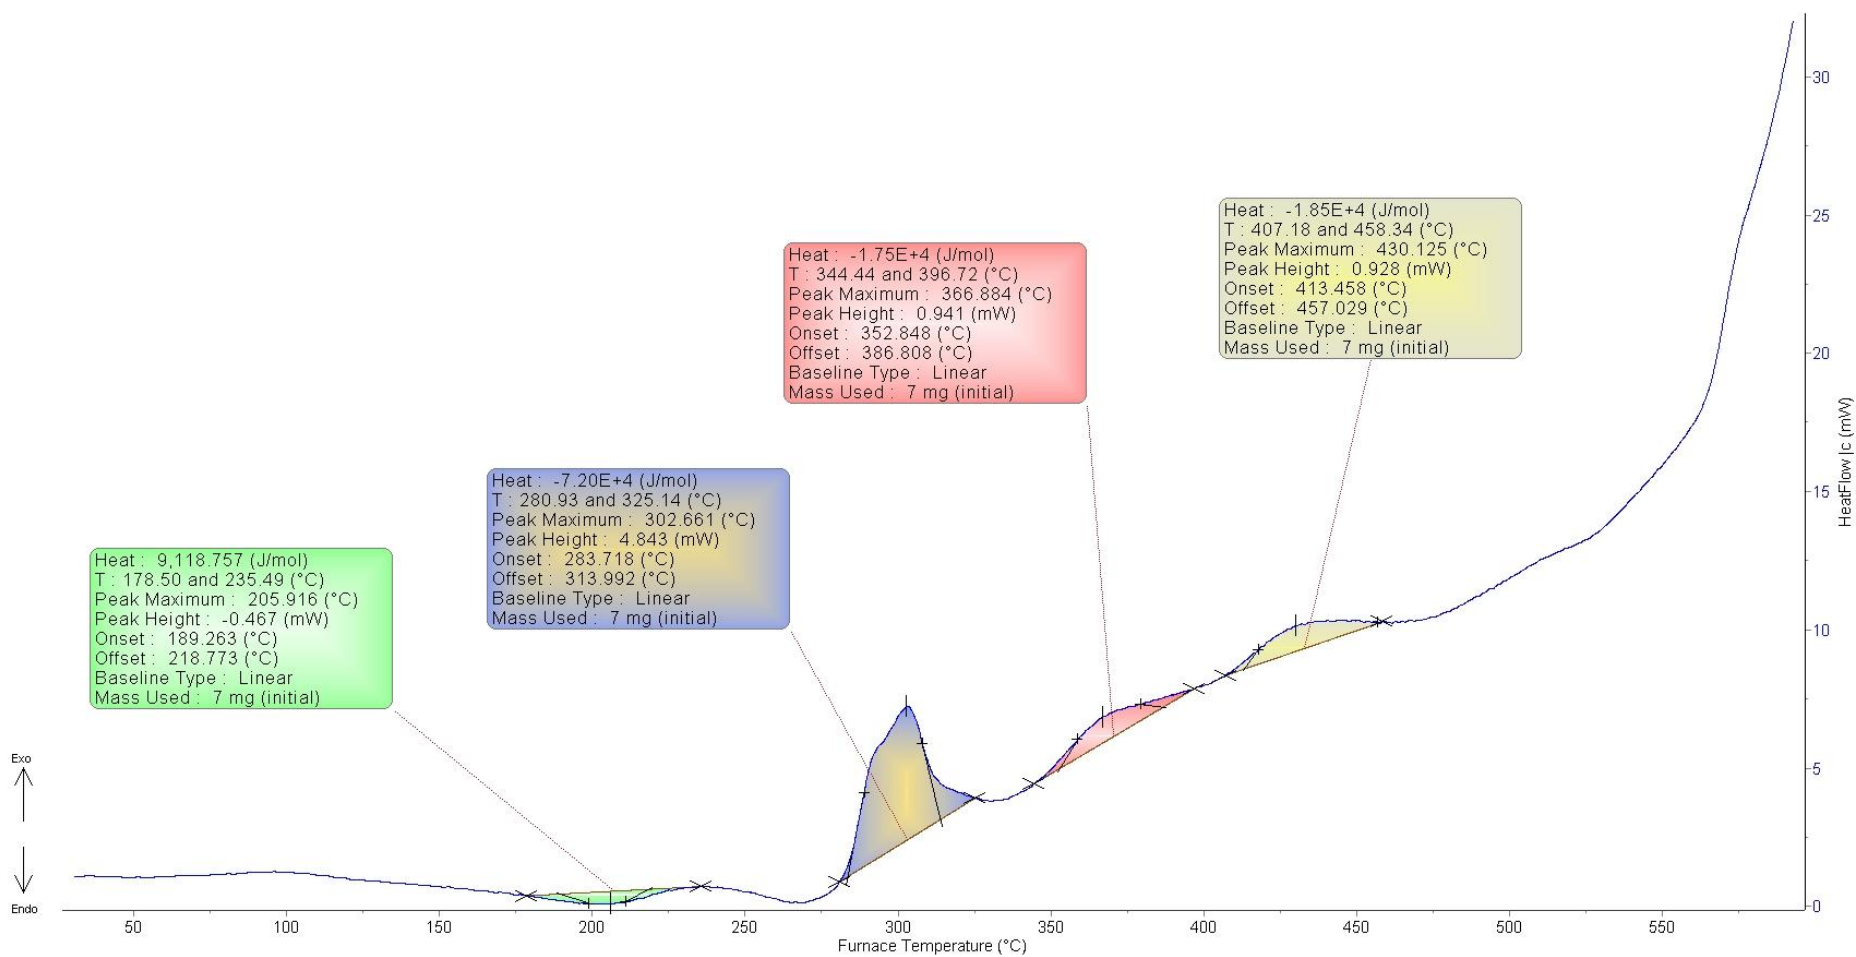

**Figure S21.** DSC plot for the  $\text{Co}(\text{H}_2\text{cppZol})(\text{H}_2\text{O}) \cdot 2\text{H}_2\text{O}$  complex (**1a**).

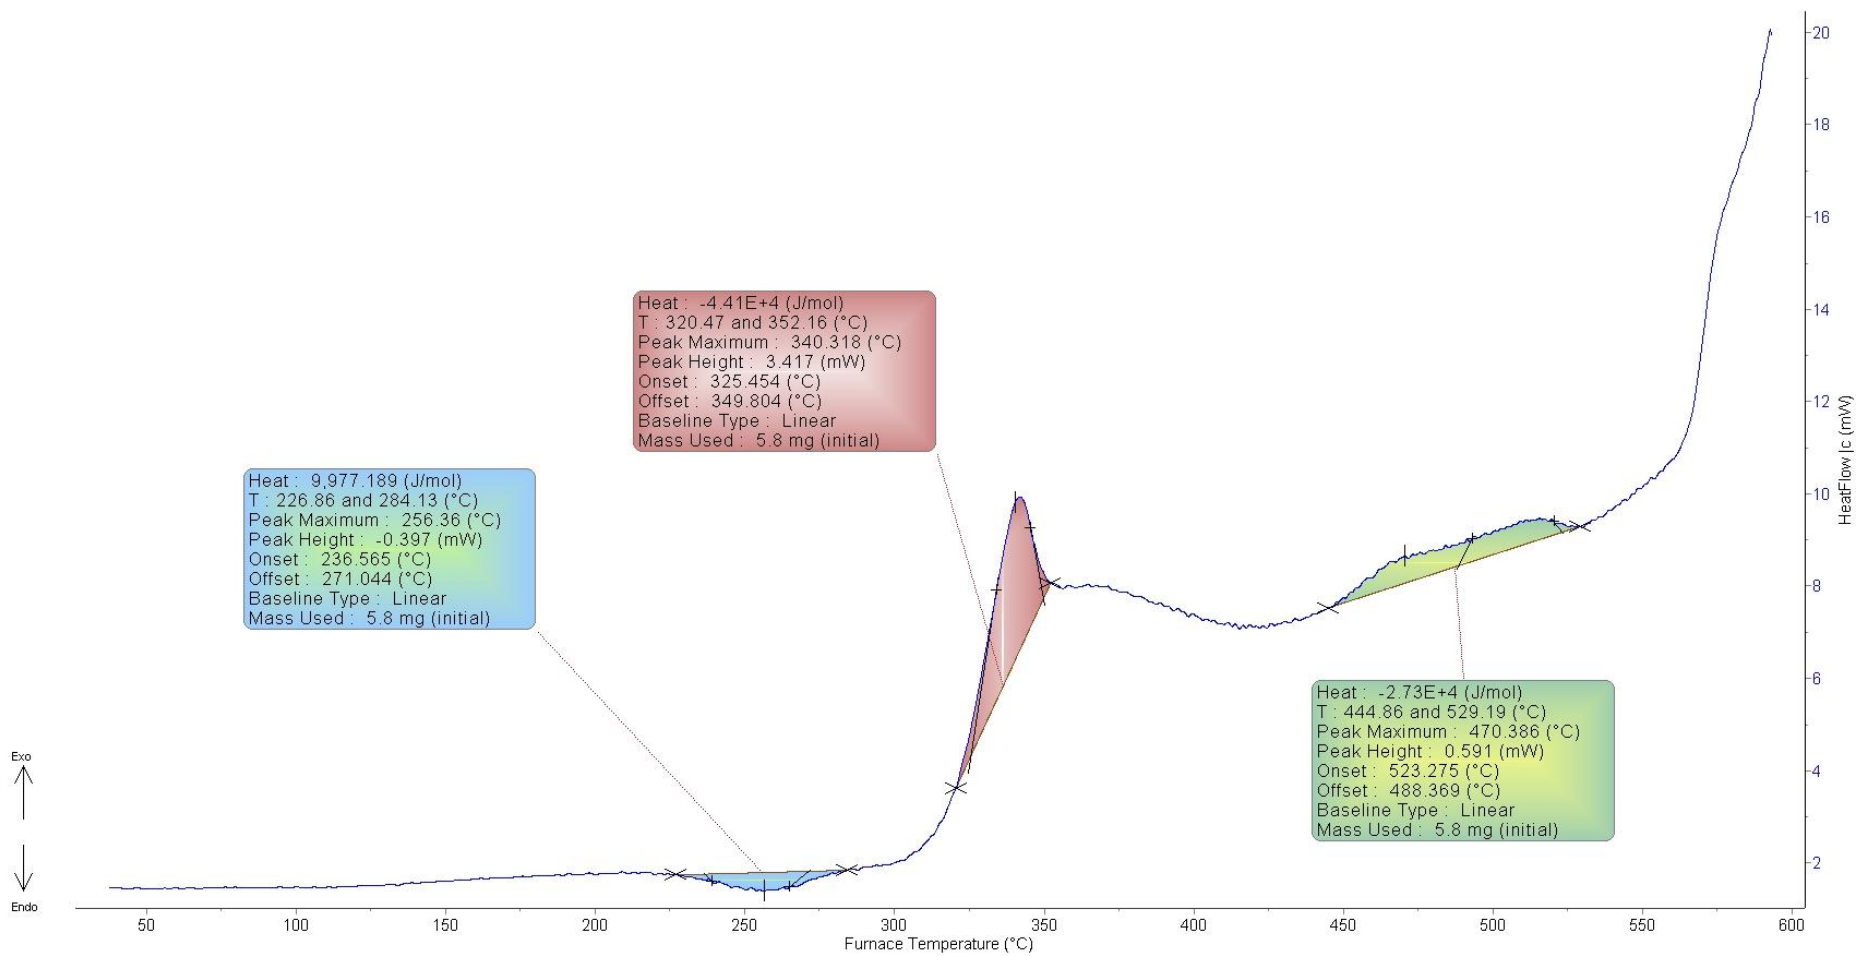

**Figure S22.** DSC plot for the  $\text{Ni}(\text{H}_2\text{cppZol})(\text{H}_2\text{O})\cdot 2\text{H}_2\text{O}$  complex (**1b**).

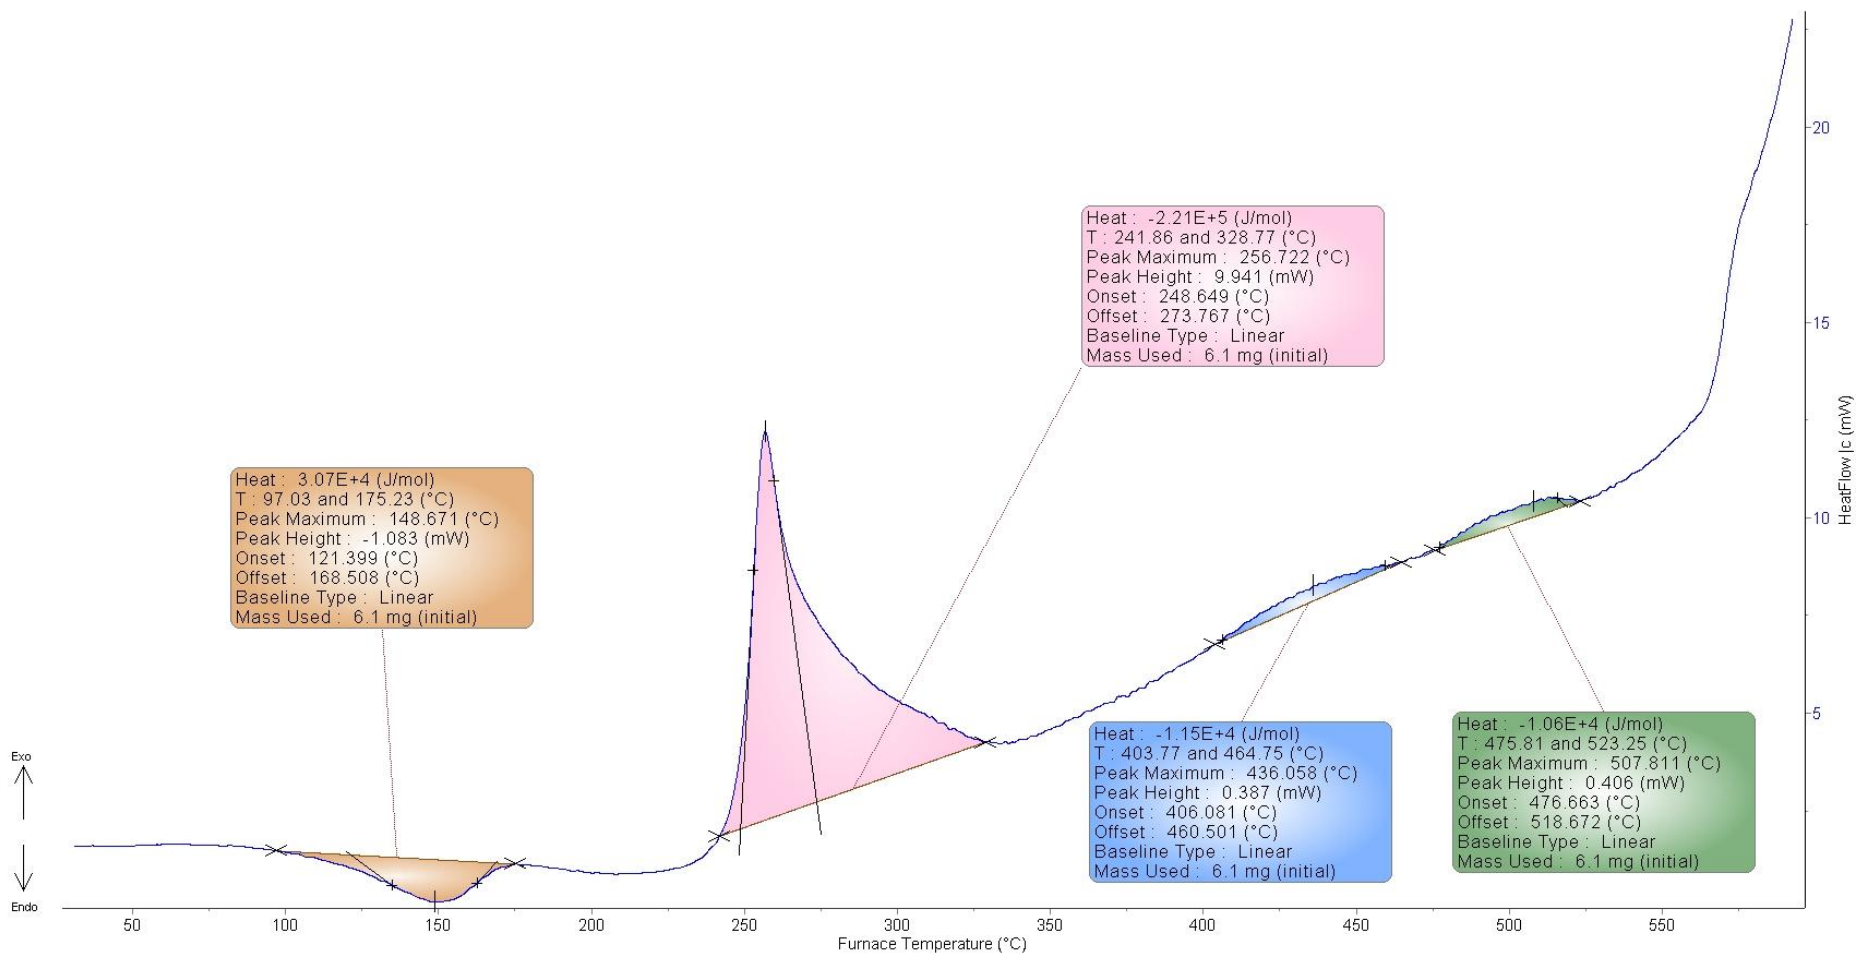

**Figure S23.** DSC plot for the  $\text{Co}(\text{H}_2\text{cbtZol})(\text{H}_2\text{O})\cdot 2\text{H}_2\text{O}$  complex (**2a**).

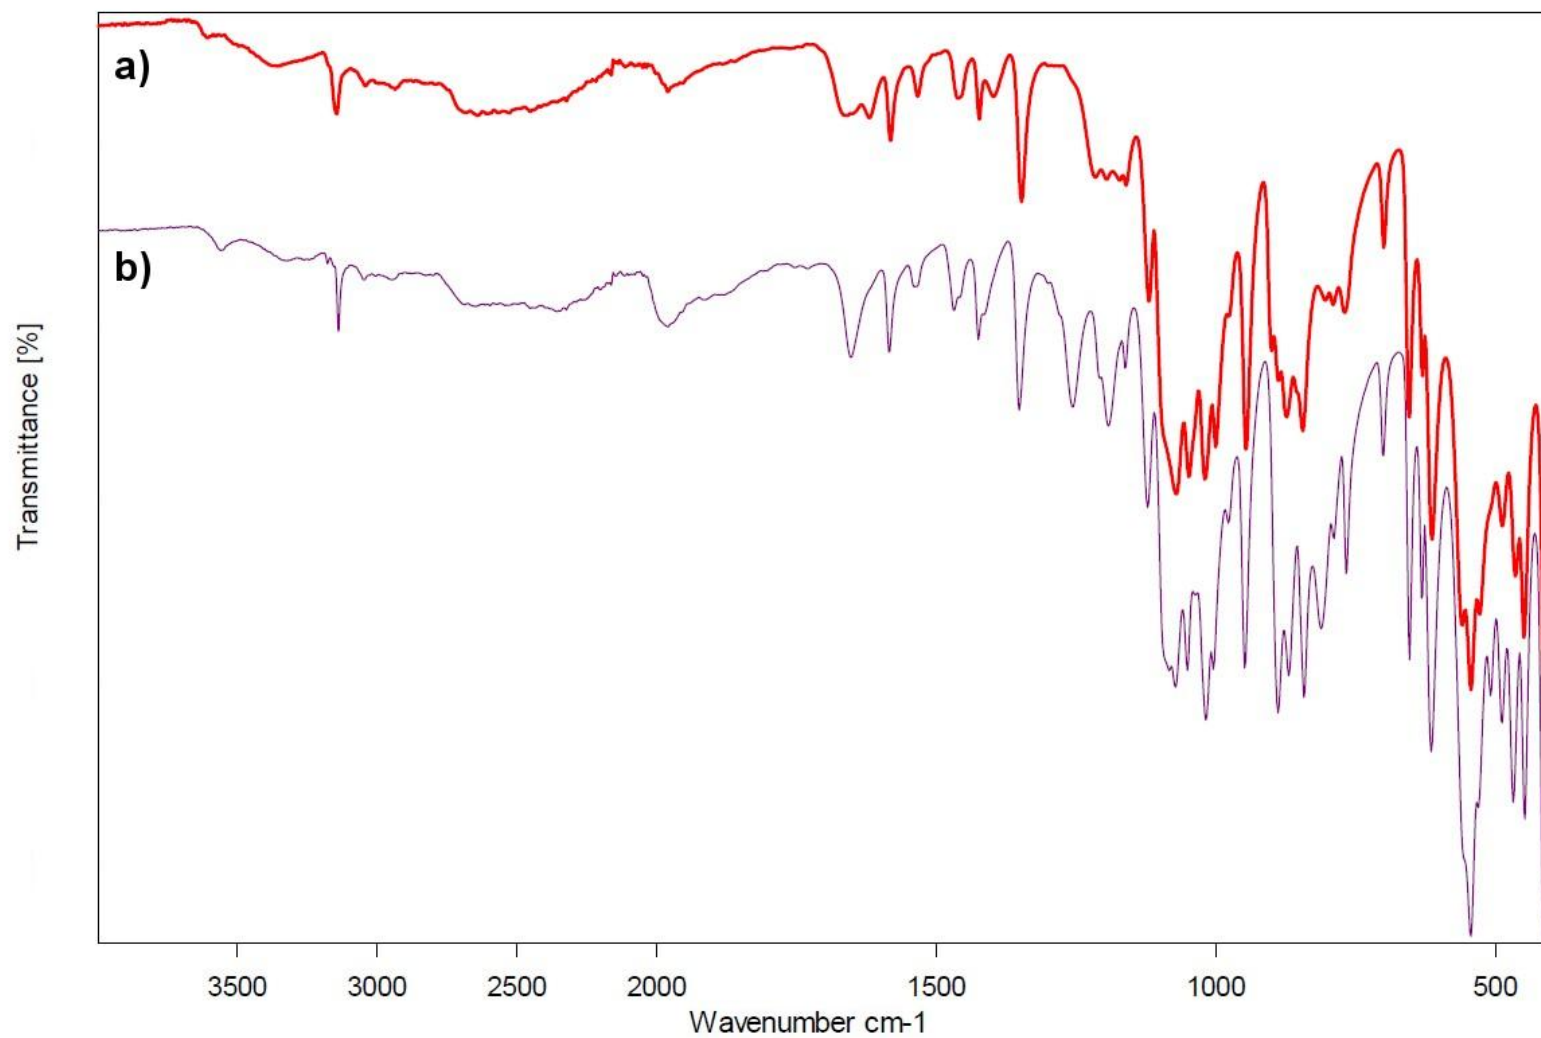

**Figure S24.** IR spectra of (a) crystalline **1a** and solid obtained by heating sample of the complex up to (b) 219 °C.

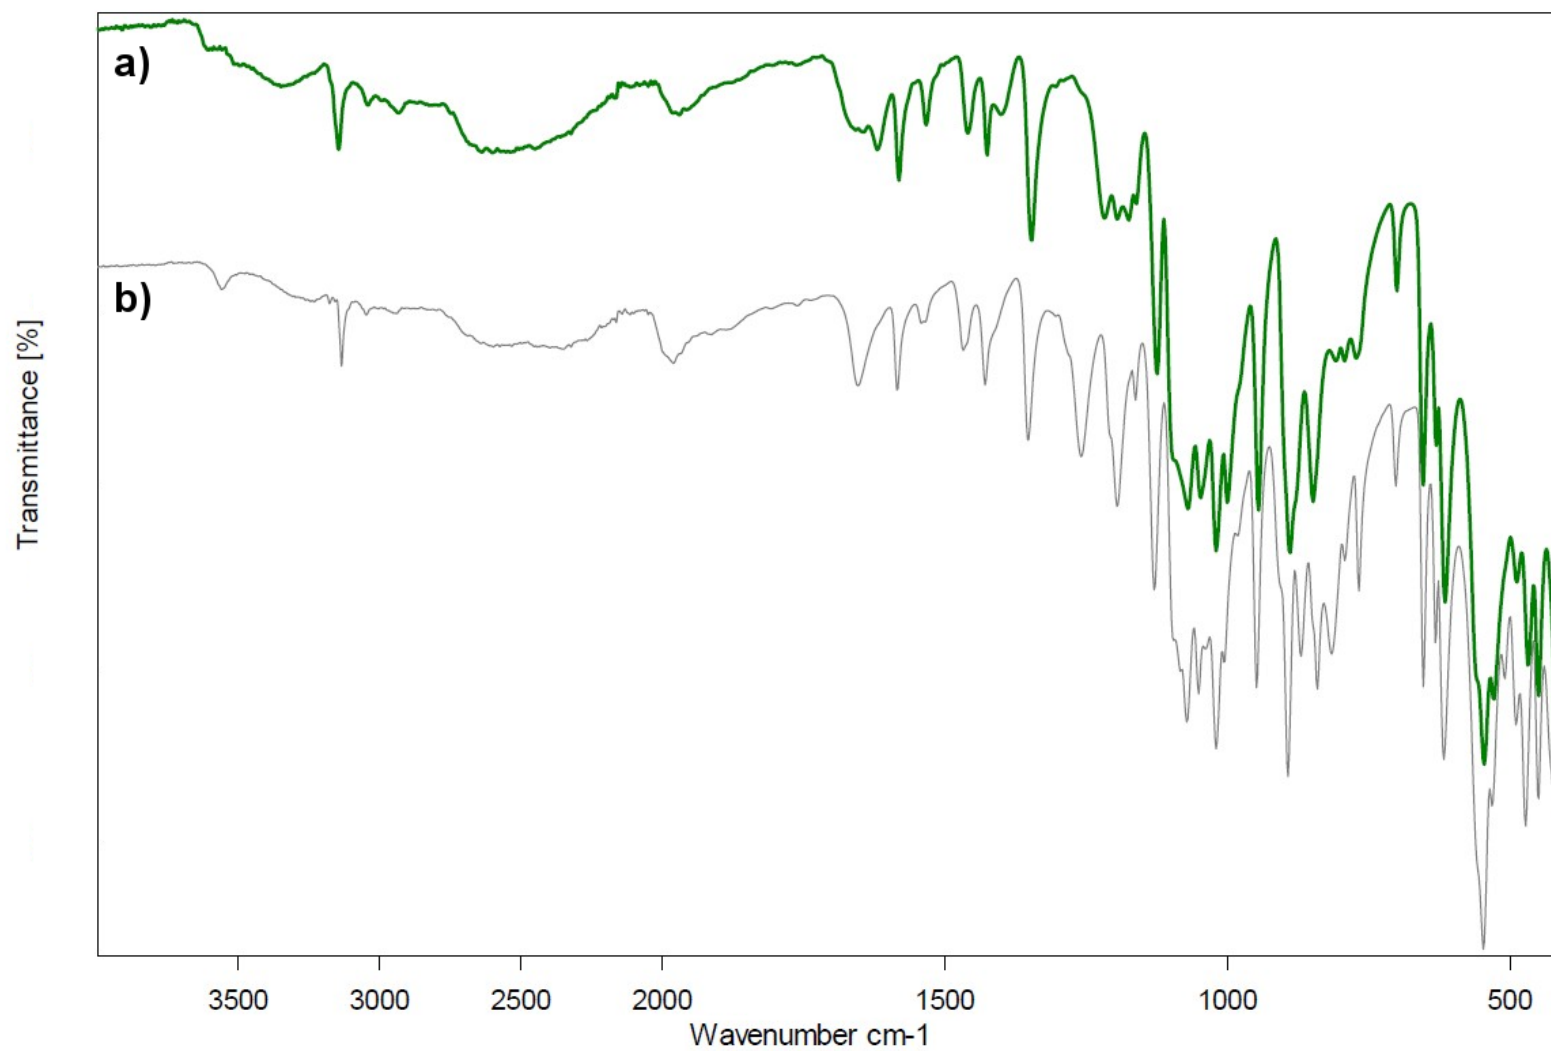

**Figure S25.** IR spectra of (a) crystalline **1b** and solid obtained by heating sample of the complex up to (b) 284 °C.

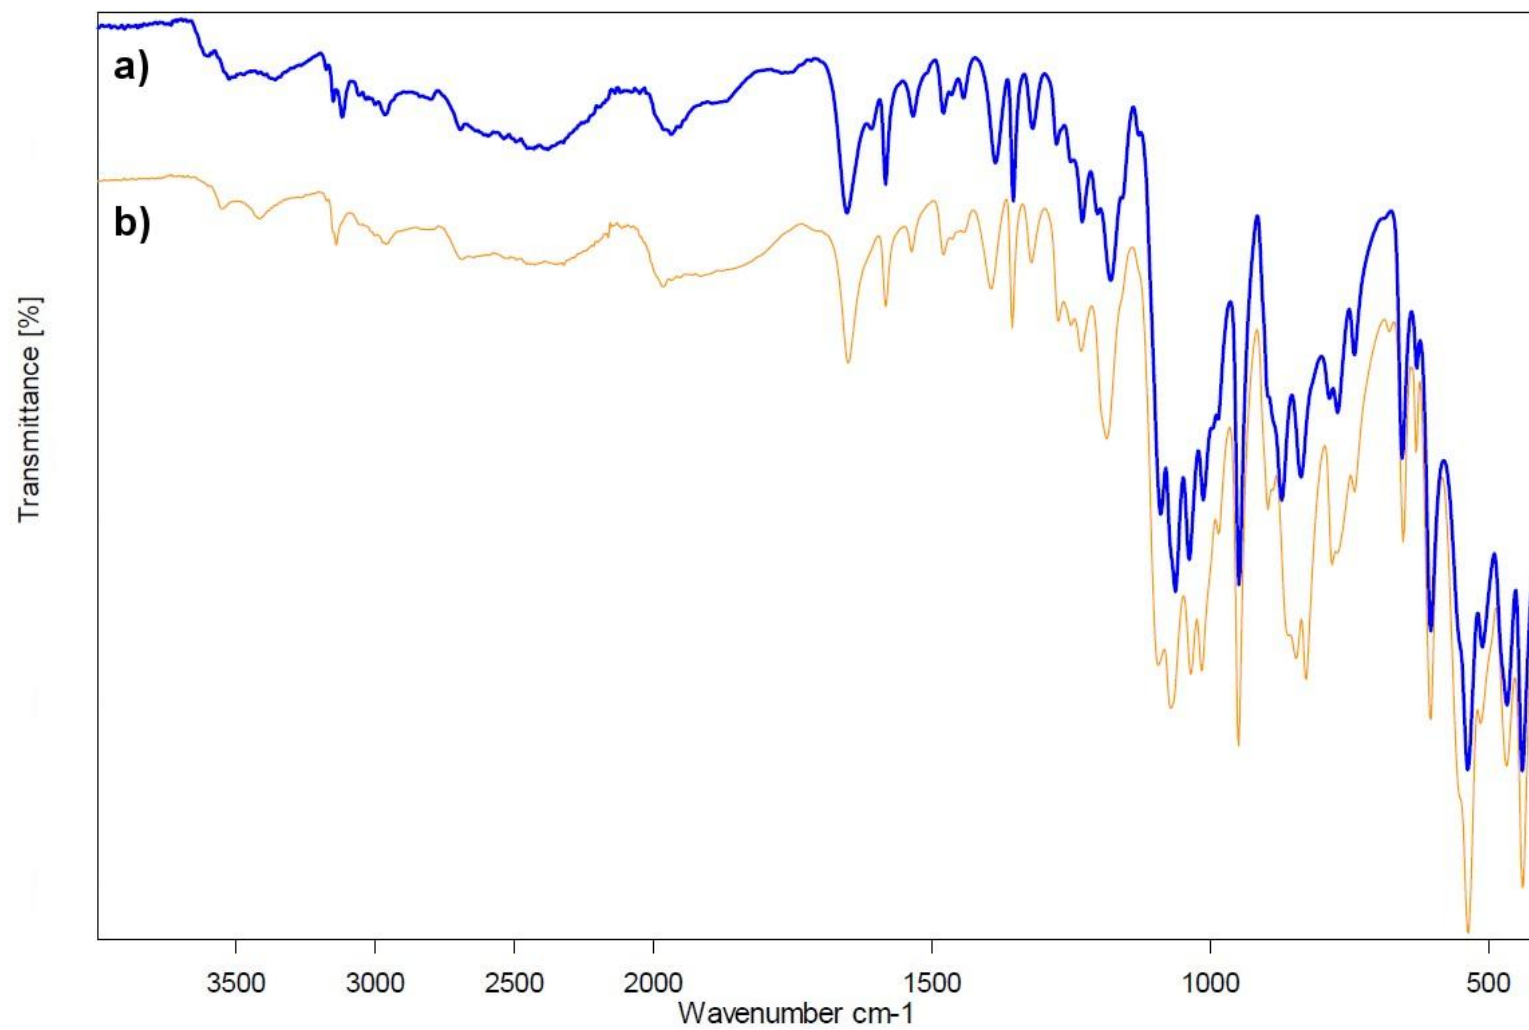

**Figure S26.** IR spectra of (a) crystalline **2a** and solid obtained by heating sample of the complex up to (b) 175 °C.



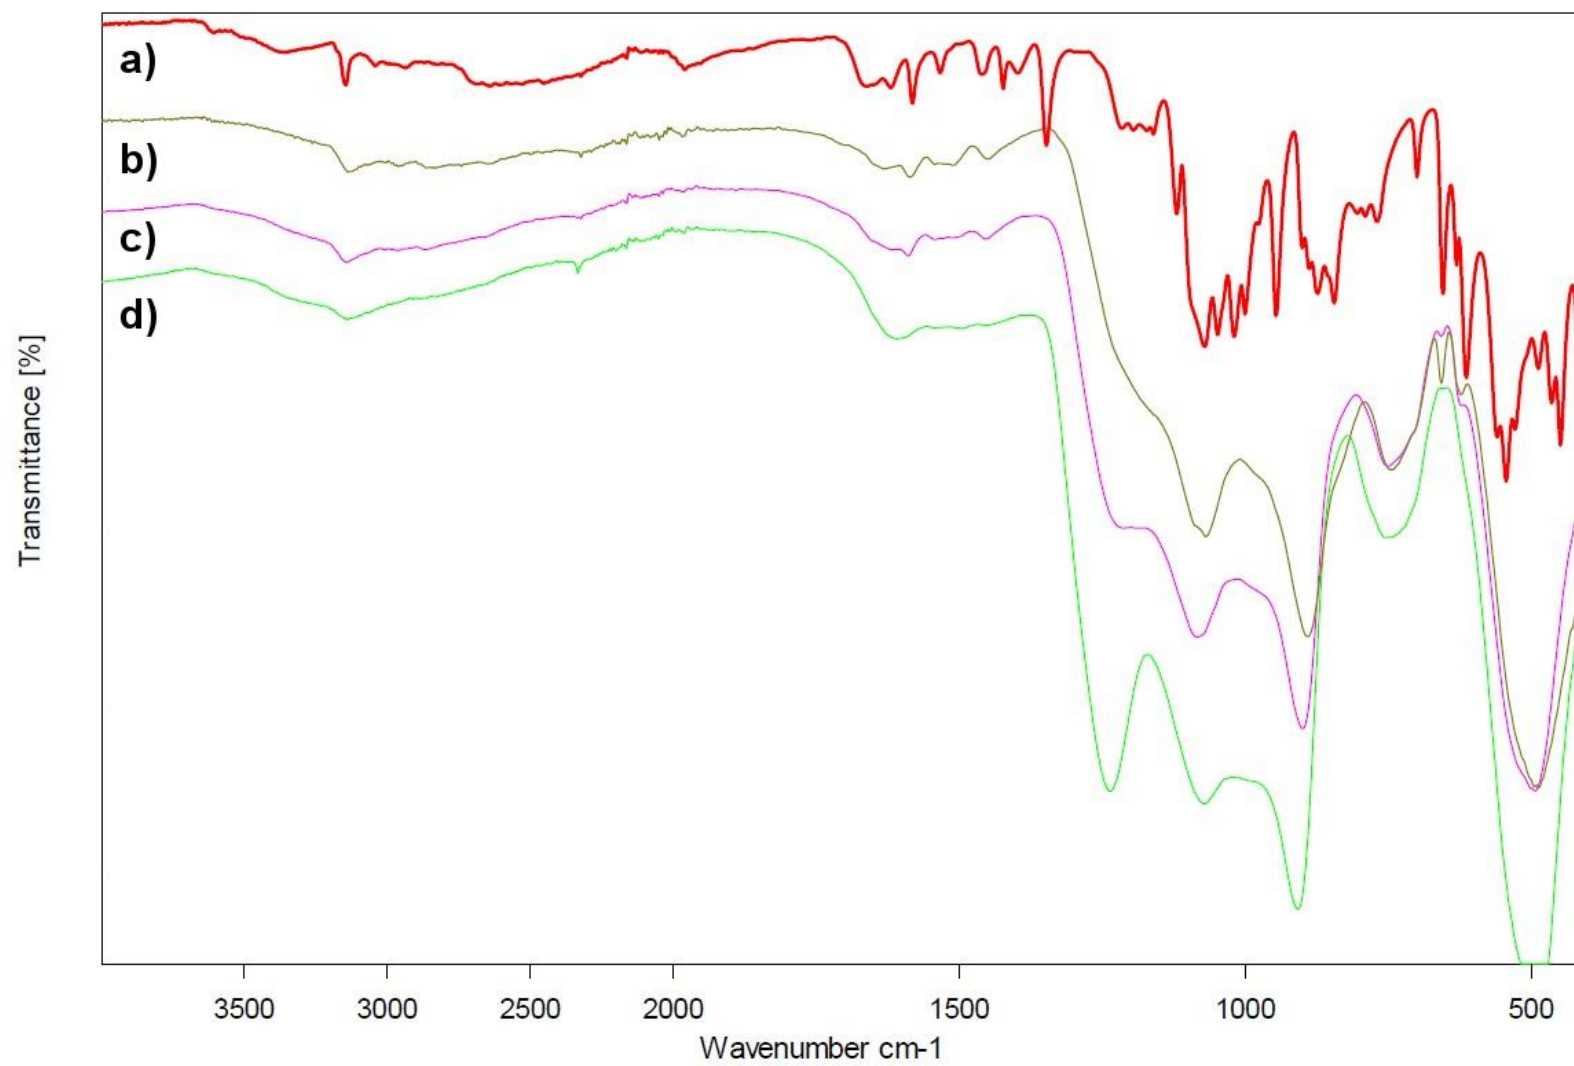

**Figure S27.** IR spectra of (a) crystalline **1a** and solids obtained by heating sample of the complex up to (b) 314 °C; (c) 387 °C; (d) 457 °C.

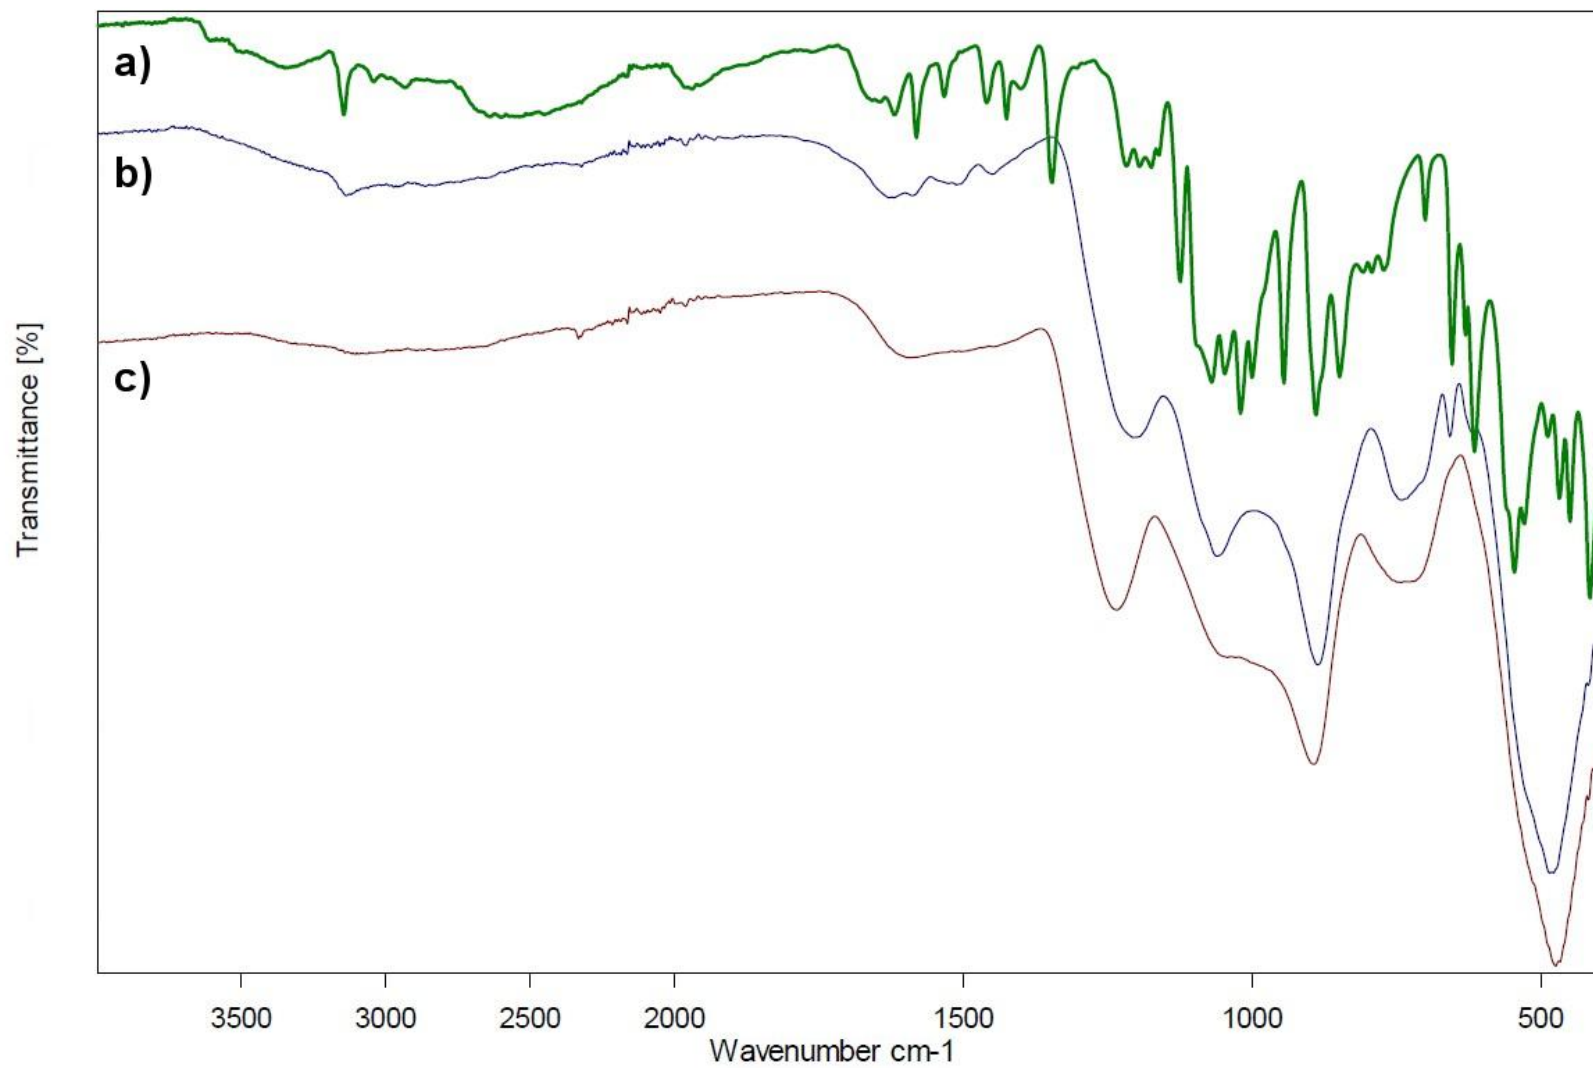

**Figure S28.** IR spectra of (a) crystalline **1b** and solids obtained by heating sample of the complex up to (b) 352 °C, (c) 529 °C.

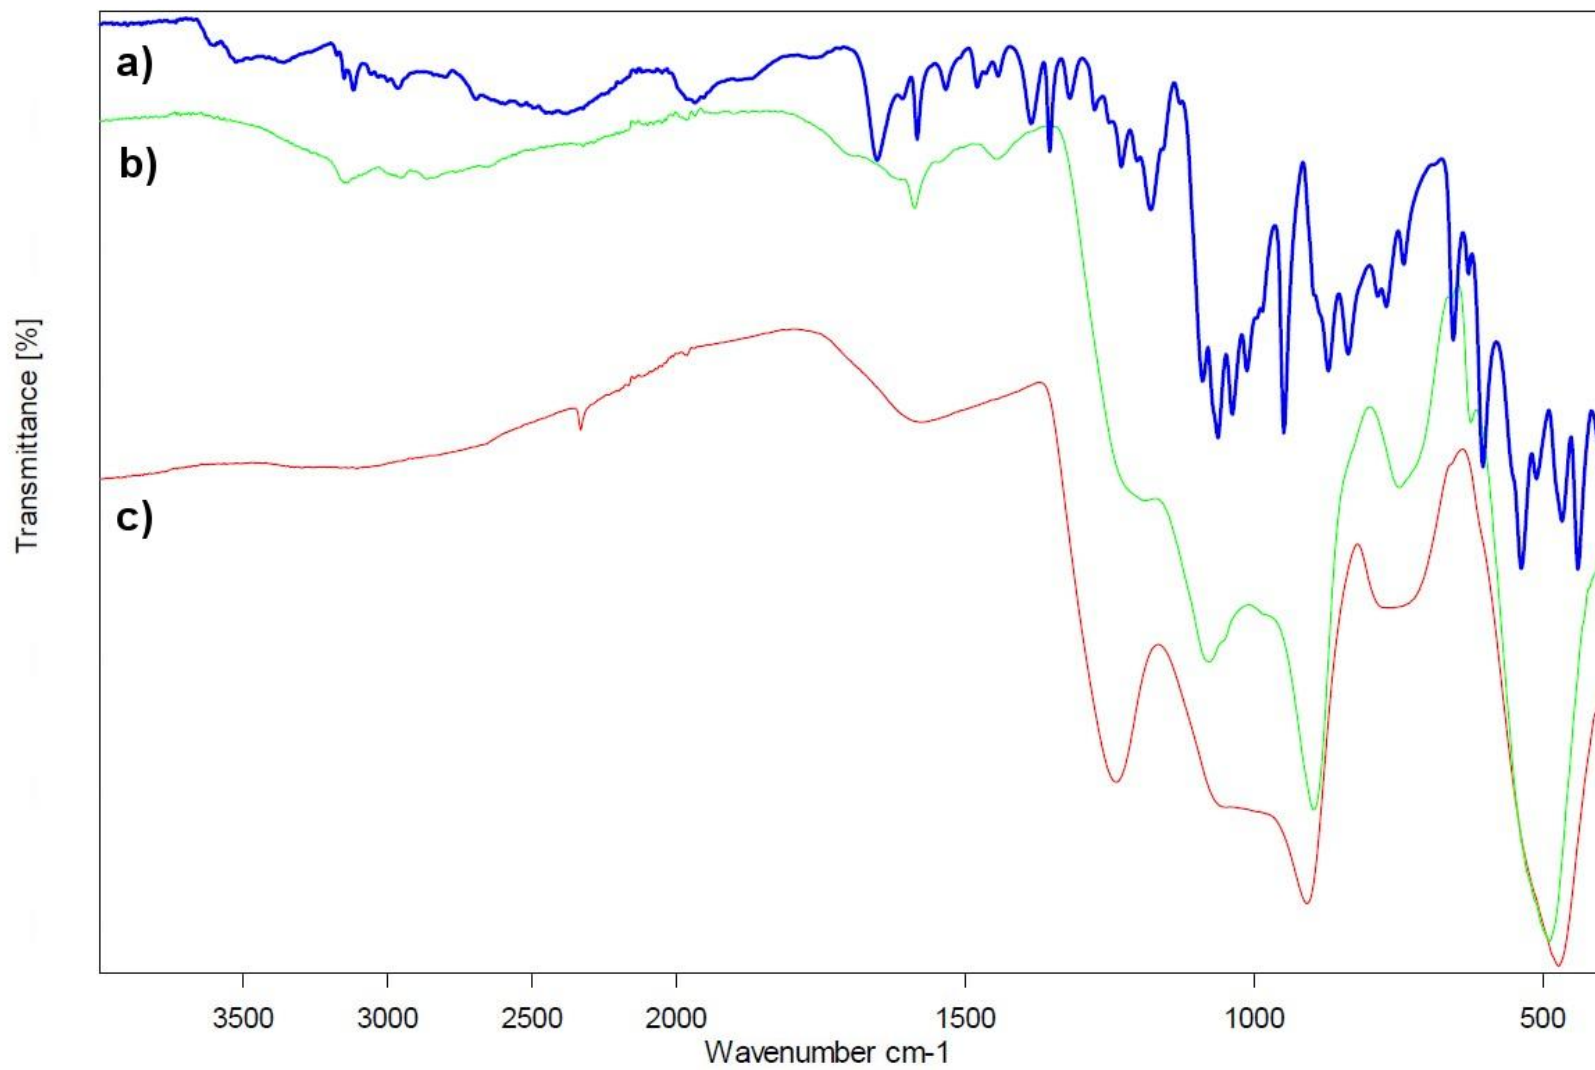

**Figure S29.** IR spectra of (a) crystalline **2a** and solids obtained by heating sample of the complex up to (b) 329 °C, (c) 525 °C.

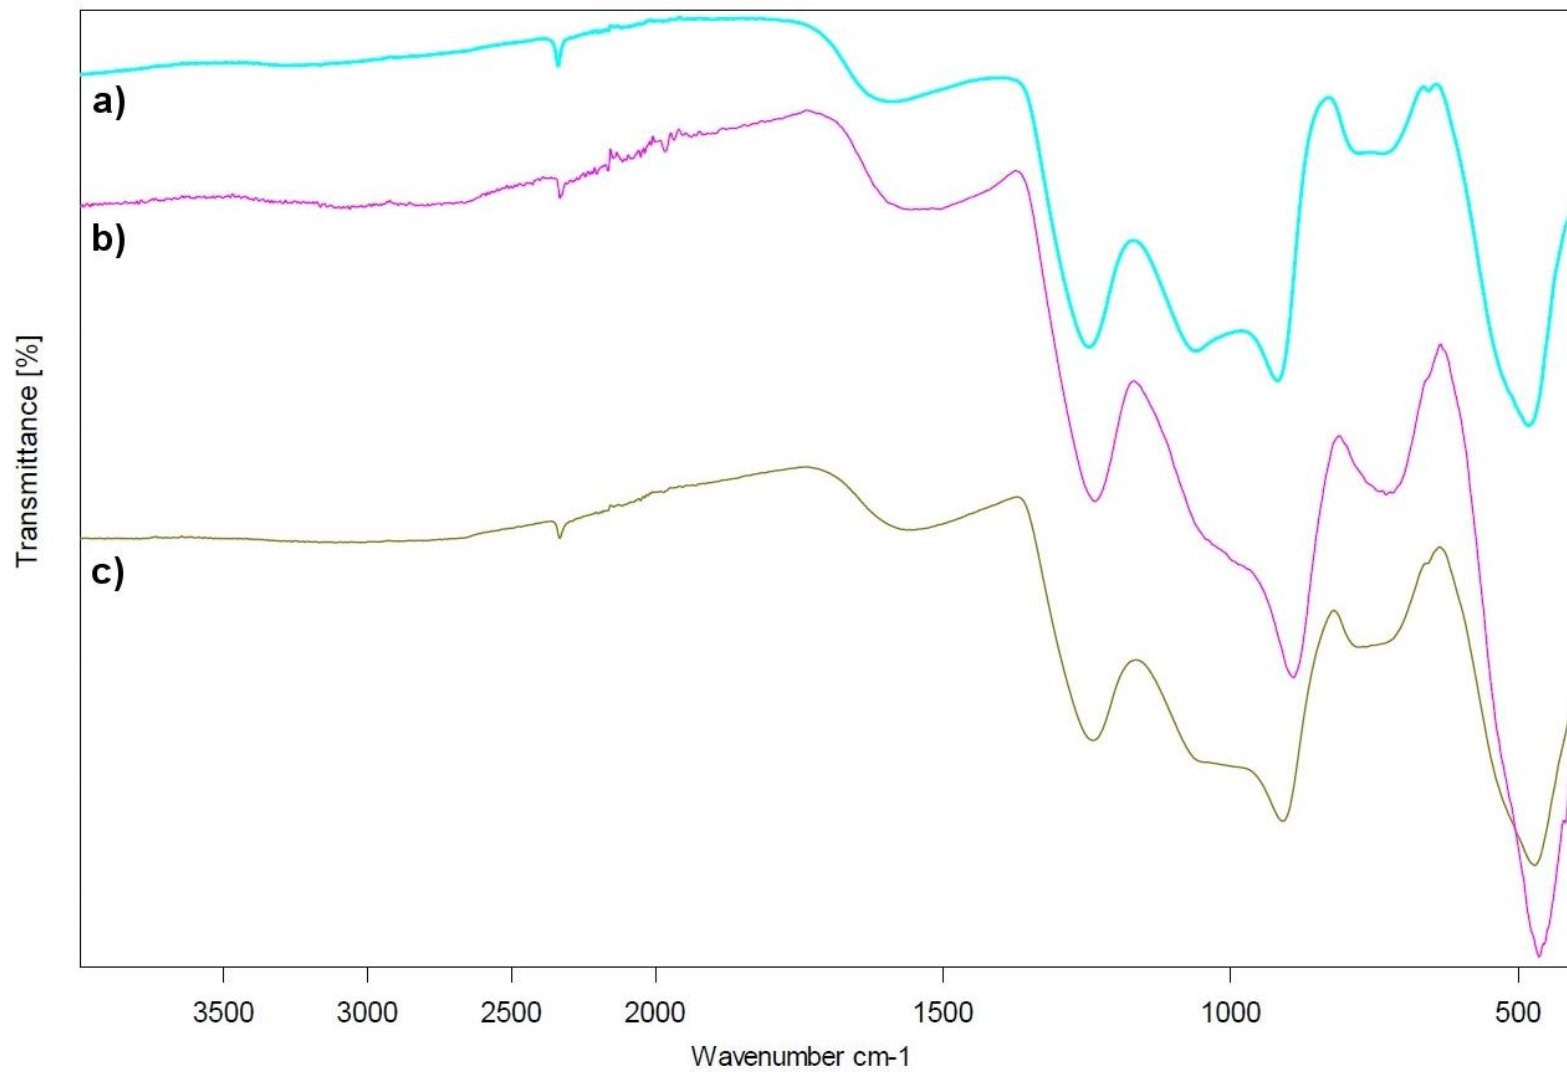

**Figure S30.** A comparison of IR spectra of solid residues, obtained by heating crystalline samples of (a) **1a**, (b) **1b** and (c) **2a** up to 600 °C.

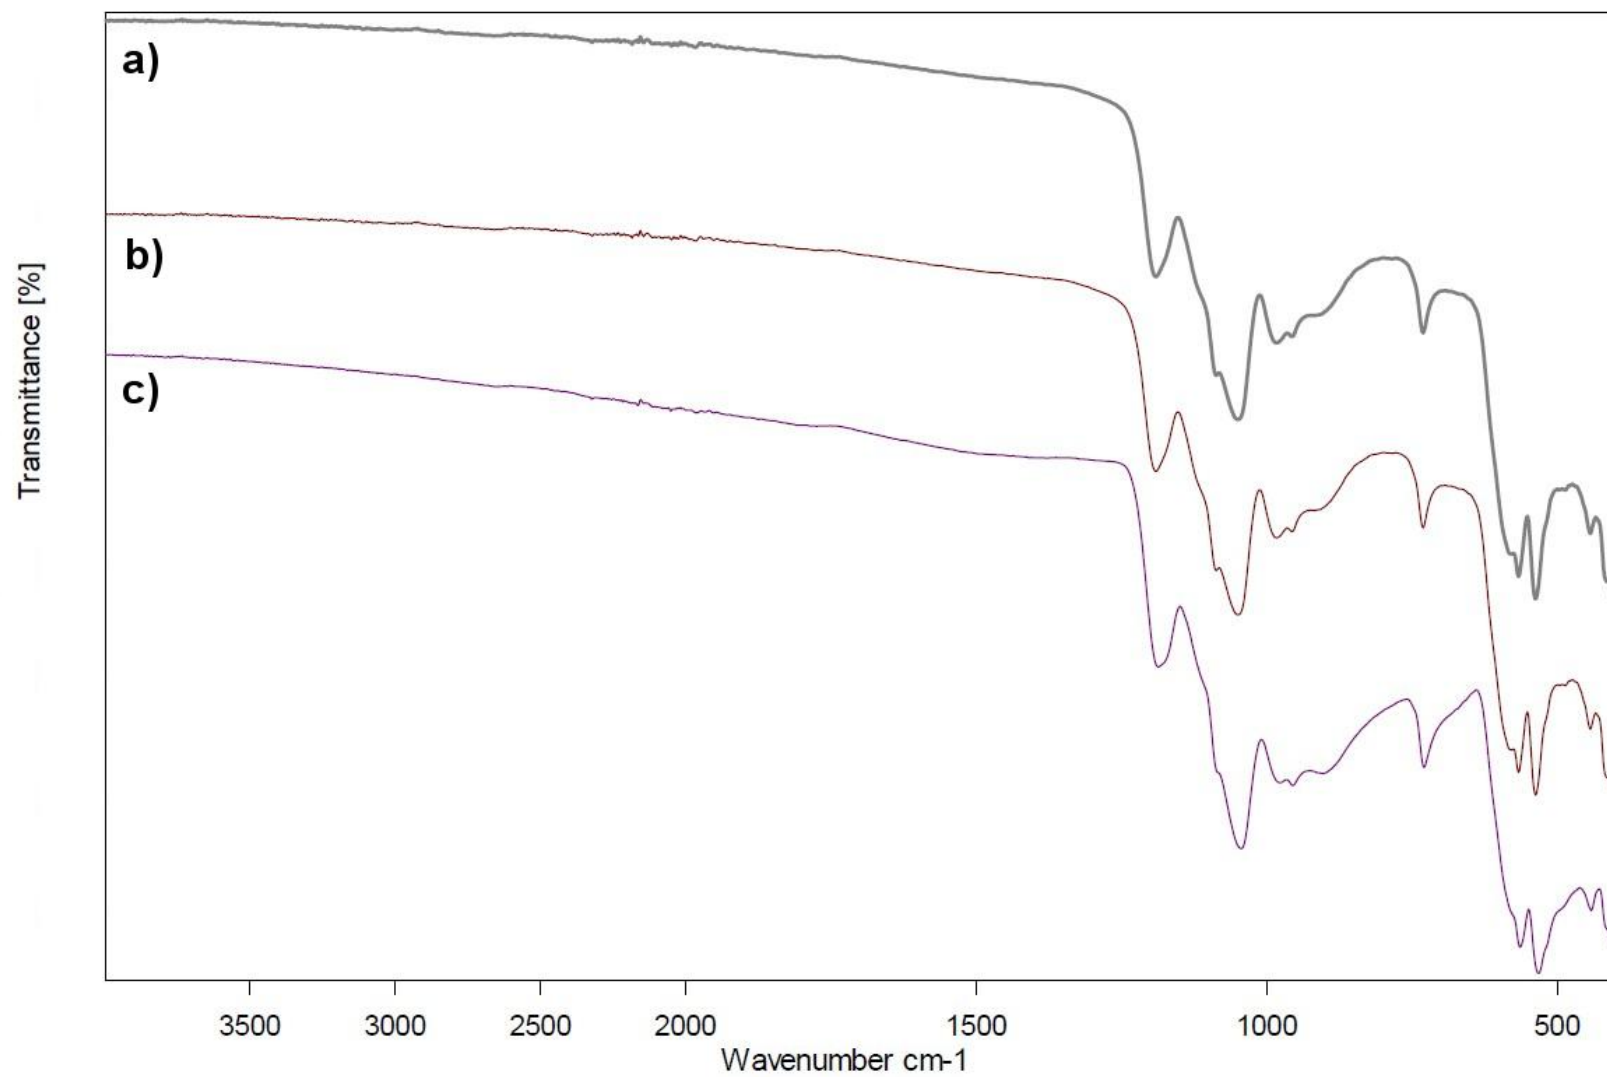

**Figure S31.** A comparison of IR spectra of solid residues, obtained by heating crystalline samples of (a) **1a**, (b) **1b** and (c) **2a** up to 1000 °C.

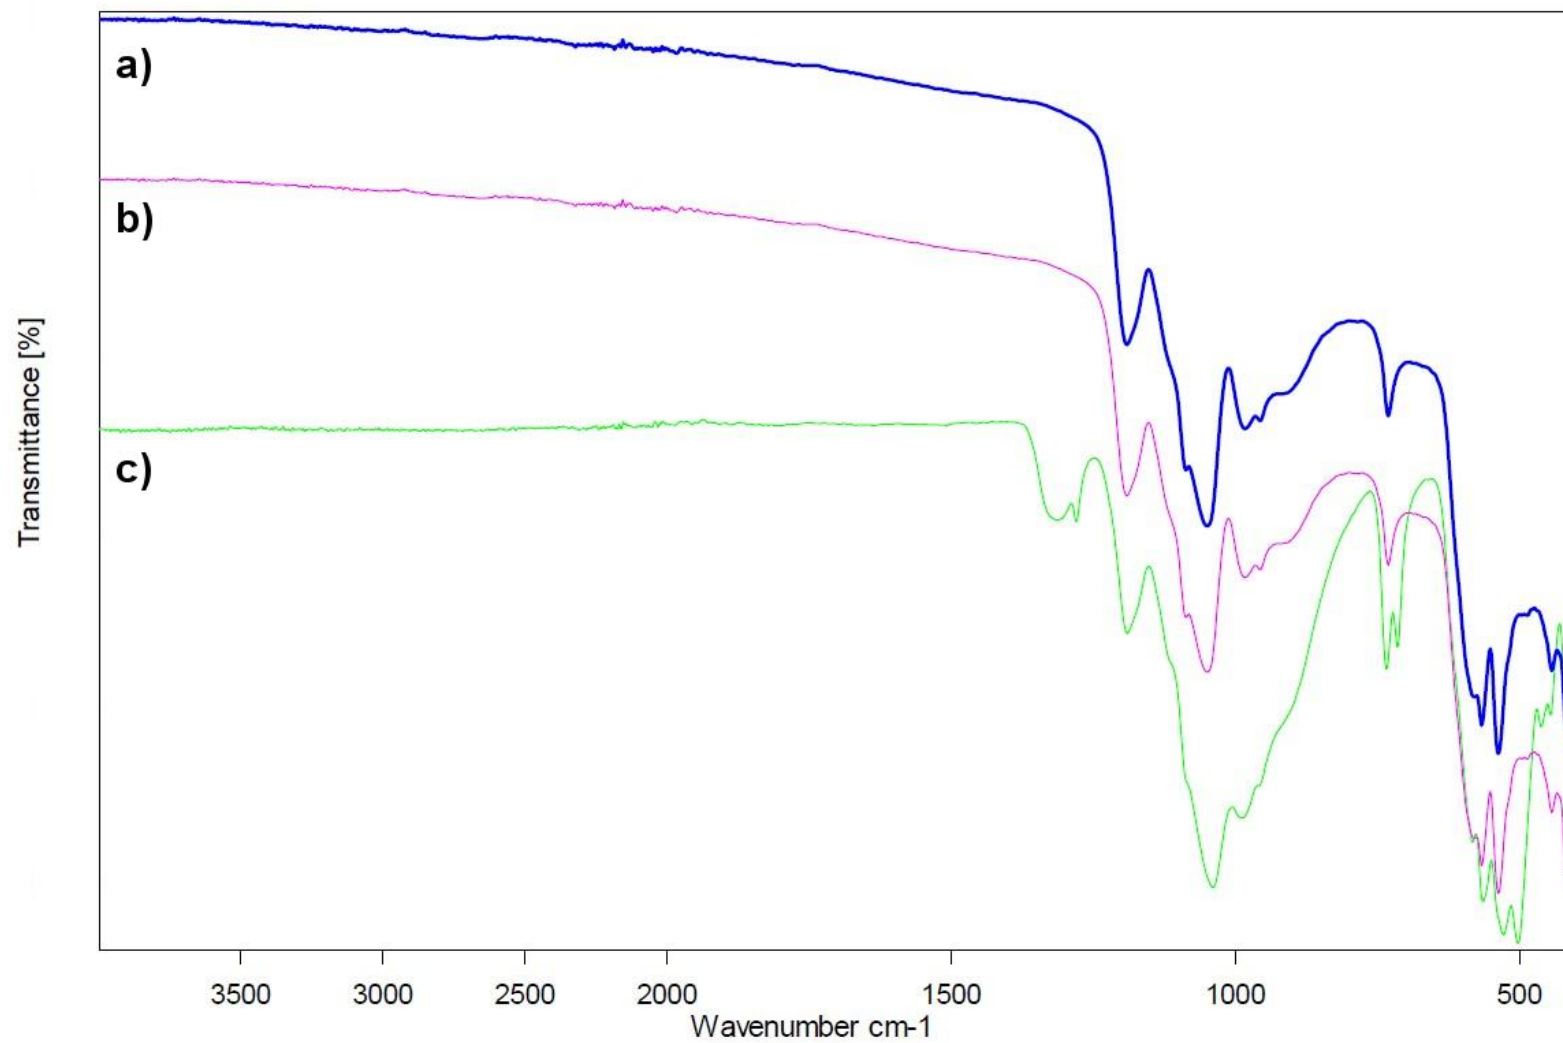

**Figure S32.** A comparison of IR spectra of solid residues, obtained by heating crystalline samples of (a) **1a**, (b) **1b** and (c) Co(II) complex of cyclopropane substituted analog of zoledronic acid –  $\text{Co}_3(\text{HcppZol})_2(\text{H}_2\text{O})_6 \cdot 6\text{H}_2\text{O}$  up to 1000 °C.

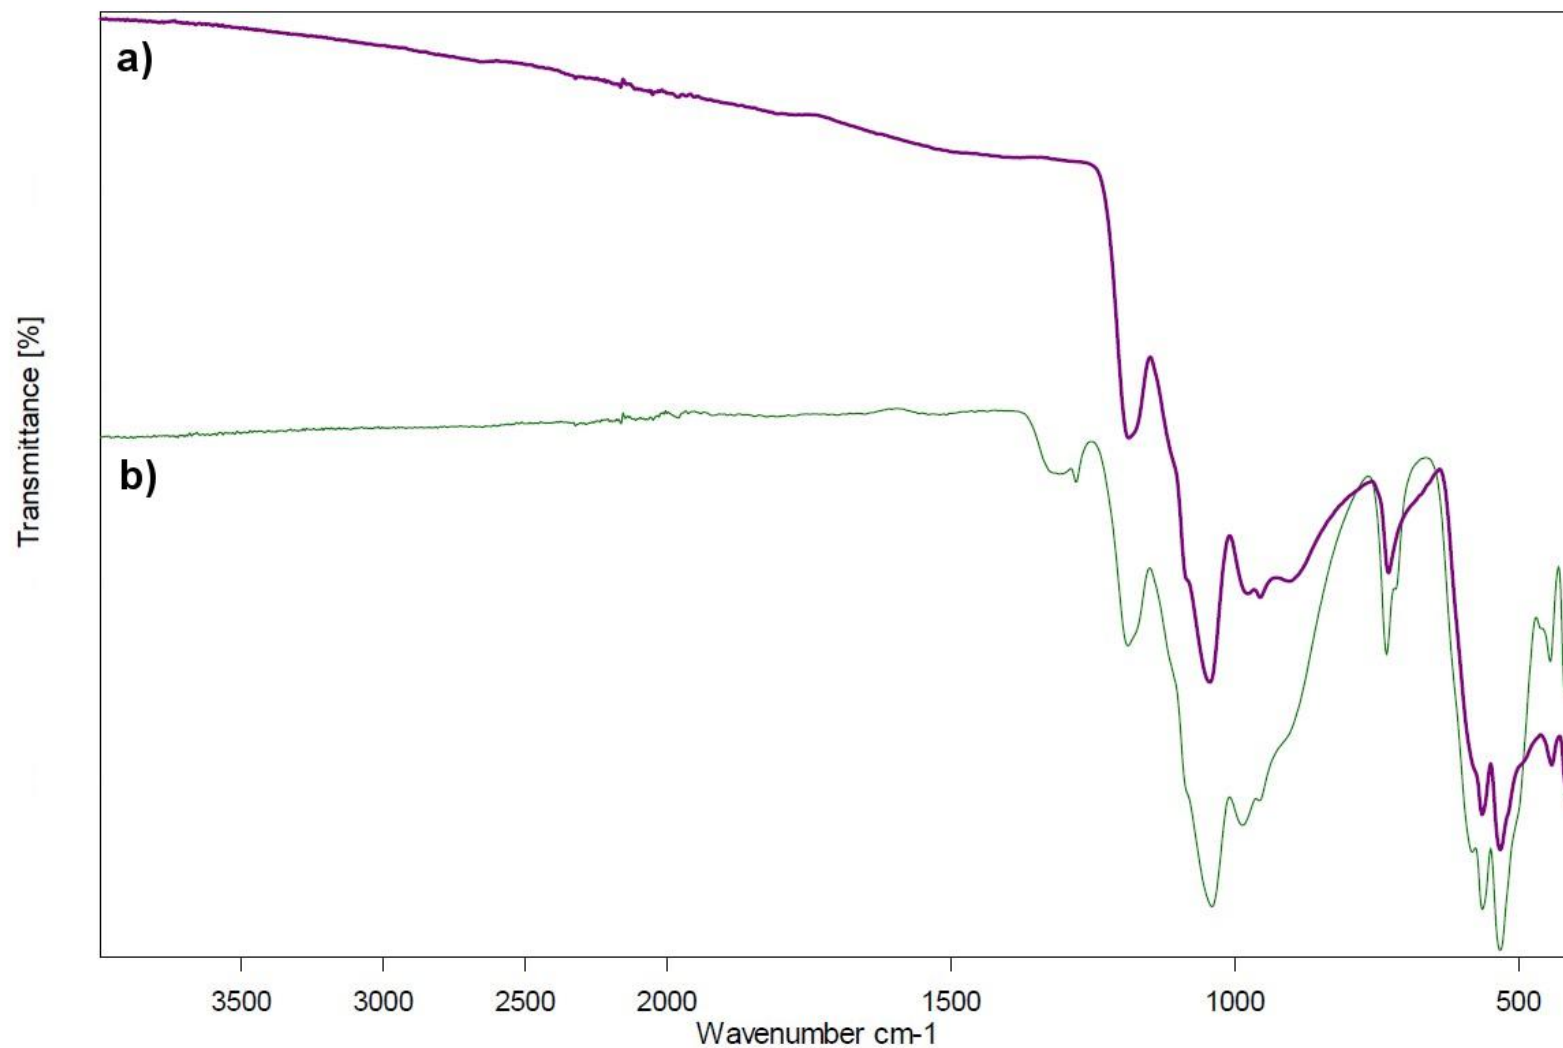

**Figure S33.** A comparison of IR spectra of solid residues, obtained by heating a crystalline sample of (a) **2a** and (b) Co(II) complex of cyclobutane substituted analog of zoledronic acid –  $\text{Co}_3(\text{HcbtZol})_2(\text{H}_2\text{O})_6 \cdot 6\text{H}_2\text{O}$  up to 1000 °C.

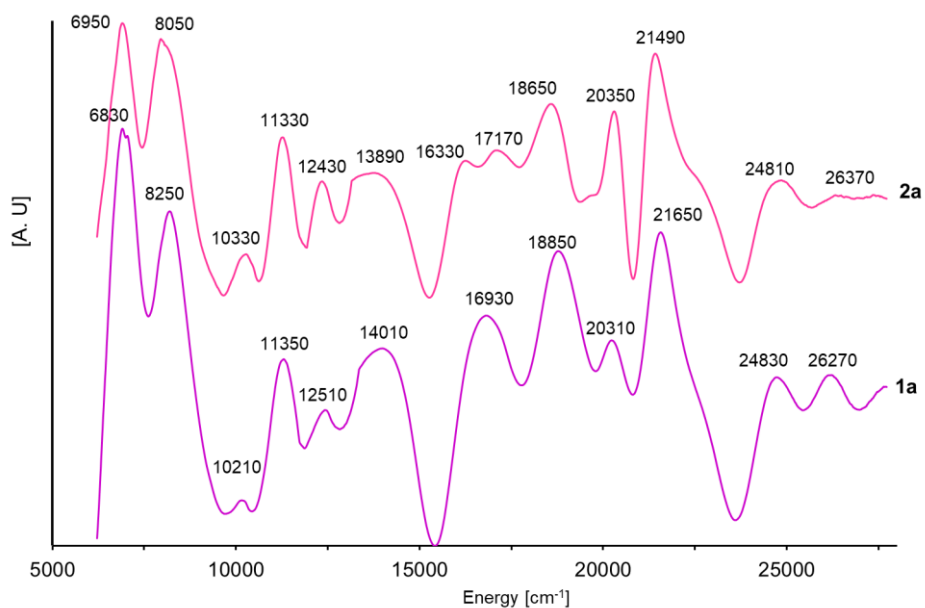

**Figure S34.** The effect of filtering process of *d-d* bands for the spectra of cobalt(II) complexes (**1a**, **2a**) in the 5000-28000  $\text{cm}^{-1}$  spectral range (spectral range parameters: step = 20  $\text{cm}^{-1}$ ,  $\alpha = 400$  and  $N = 40$  (**1a**), step = 20  $\text{cm}^{-1}$ ,  $\alpha = 400$  and  $N = 30$  (**2a**)).

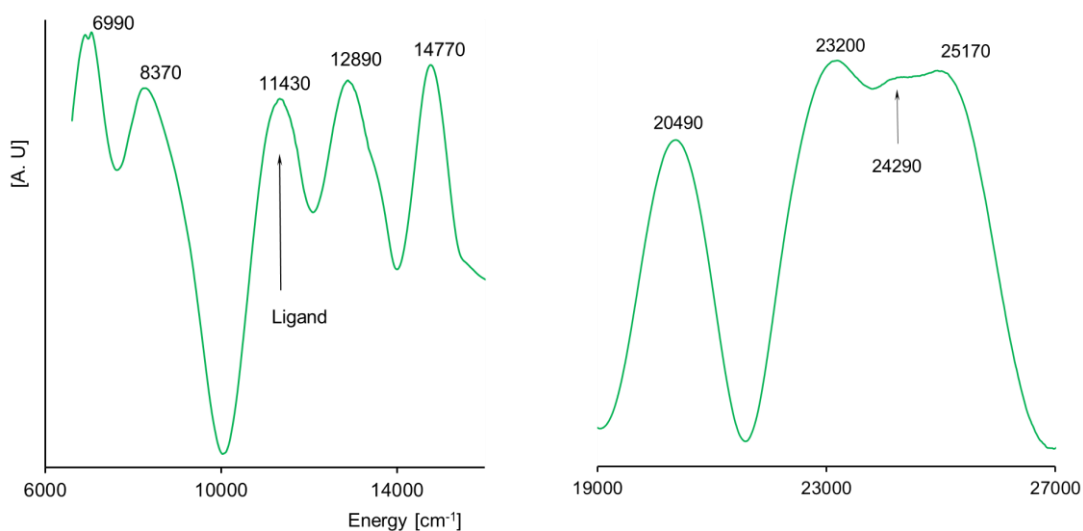

**Figure S35.** The effect of filtering process of *d-d* bands for the spectrum of the nickel(II) complex (**1b**) in the 6000-27000  $\text{cm}^{-1}$  spectral range (spectral range parameters: step = 20  $\text{cm}^{-1}$ ,  $\alpha = 500$ ,  $N = 40$ ).



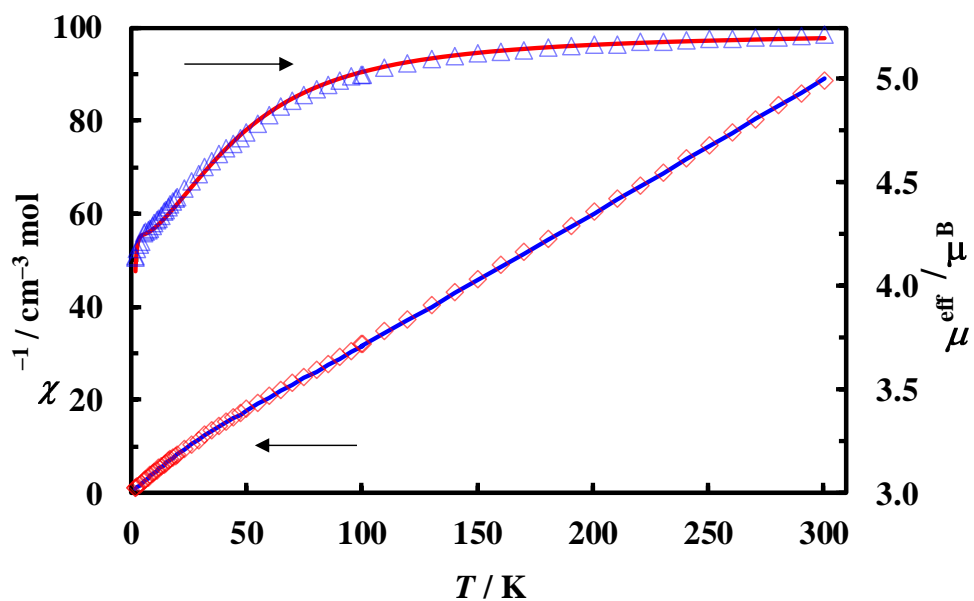

**Figure S36.** Variation of  $\chi^{-1}$  (diamonds) and  $\mu_{\text{eff}}$  (triangles) for **1a** with temperature. The lines represent the fit to the alternating-exchange spin-chain model (see the main text).

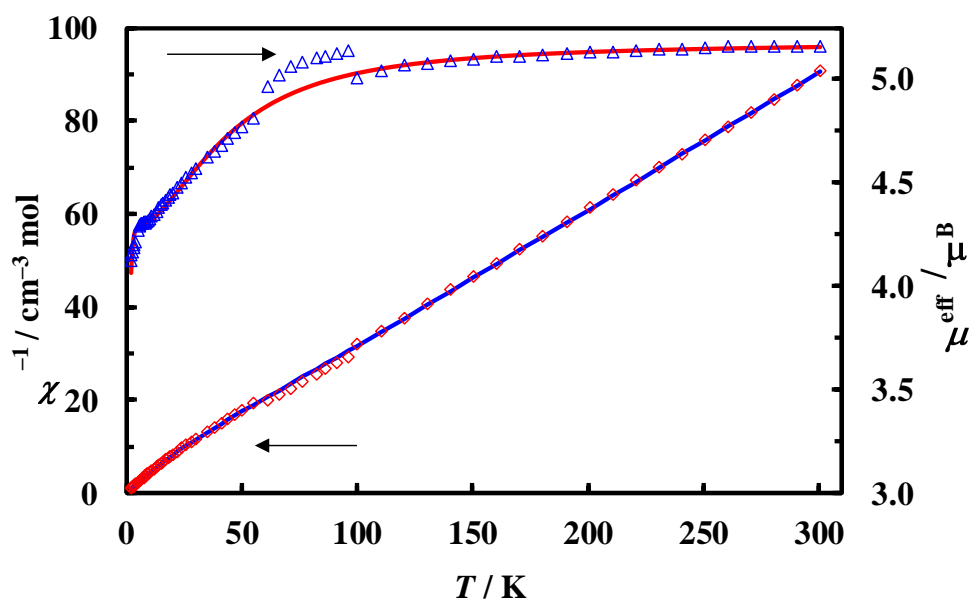

**Figure S37.** Variation of  $\chi^{-1}$  (diamonds) and  $\mu_{\text{eff}}$  (triangles) for **2a** with temperature. The lines represent the fit to the alternating-exchange spin-chain model (see the main text).

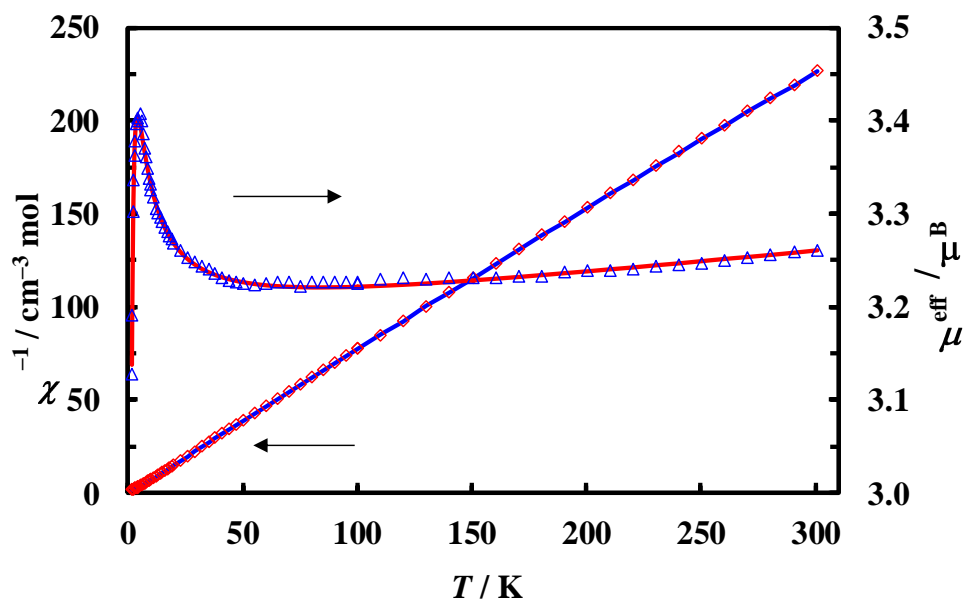

**Figure S38.** Variation of  $\chi^{-1}$  (diamonds) and  $\mu_{\text{eff}}$  (triangles) for **1b** with temperature. The lines represent the fit to the alternating-exchange spin-chain model (see the main text).

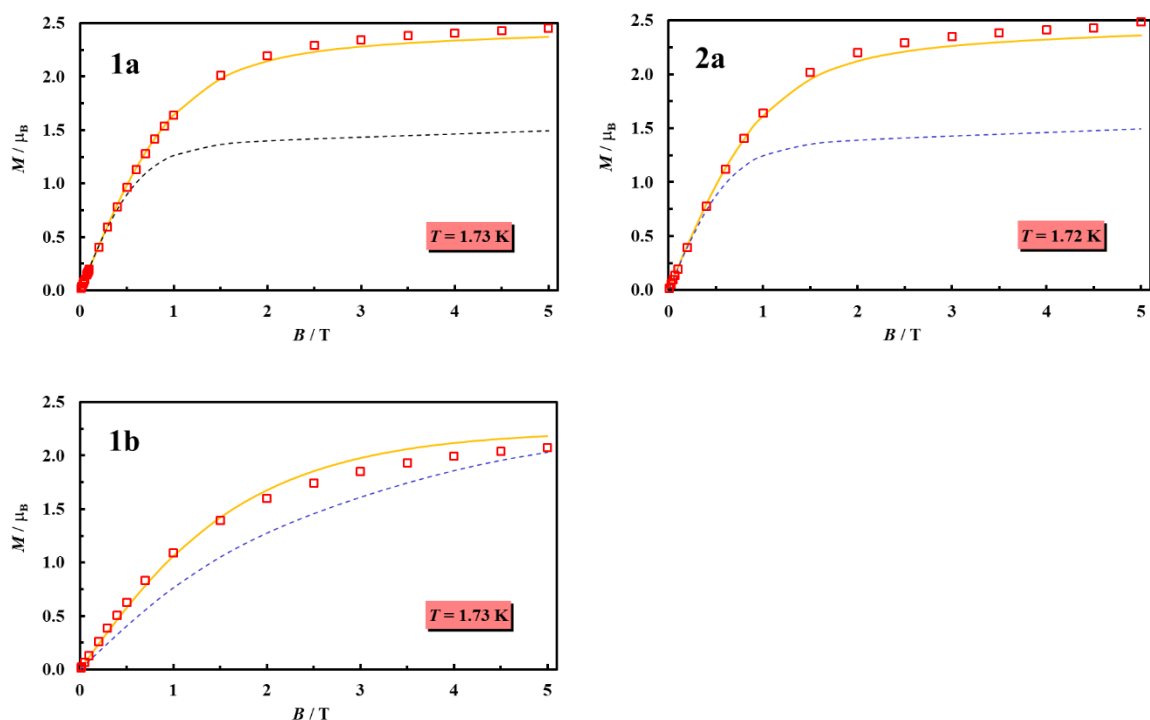

**Figure S39.** Magnetization curves versus applied magnetic field. The solid lines were calculated using parameters  $g$ ,  $D$ ,  $TIP$  identical to those obtained for magnetic susceptibility, but without magnetic exchange. The dotted lines for cobalt compounds (**1a** and **2a**) are calculated with changed signs of the  $D$  parameters. For **1b**, the best fit parameters for  $D > 0$  ( $D = +5.0 \text{ cm}^{-1}$ ,  $g_{\text{av}} = 2.25$ ,  $TIP = 191 \cdot 10^{-6} \text{ emu/Ni}$ ).

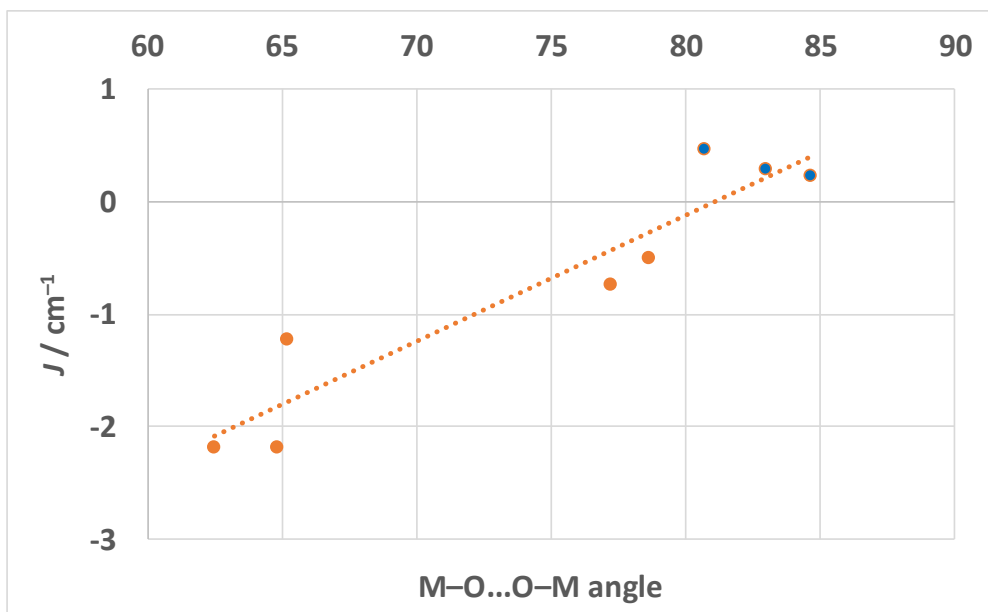

**Figure S40.** Magnetic coupling constants for Co(II) complexes as a function of the Co–O $\cdots$ O–Co torsion angle over the O–P–O bridge.

**Table S7.** Selected geometric parameters of the –O–P–O– bridges together with the corresponding magnetic exchange constants

| Compound                                                                                       | P1           |                      |                                          | P2                   |                                          |                                          |                      |         |
|------------------------------------------------------------------------------------------------|--------------|----------------------|------------------------------------------|----------------------|------------------------------------------|------------------------------------------|----------------------|---------|
|                                                                                                | <i>d</i> / Å | <i>Torsion angle</i> | <i>J</i> <sub>1</sub> / cm <sup>-1</sup> | <i>d</i> / Å         | <i>Torsion angle</i>                     | <i>J</i> <sub>2</sub> / cm <sup>-1</sup> |                      |         |
|                                                                                                | Co-Co        | CoO1...O2Co          |                                          | Co-Co                | CoO4...O6Co                              |                                          |                      |         |
| <b>1a</b>                                                                                      | 4.815        | 78.66                | -0.50                                    | 4.820                | 84.65                                    | 0.23                                     |                      |         |
| <b>2a</b>                                                                                      | 4.820        | 77.26                | -0.74                                    | 4.822                | 82.99                                    | 0.29                                     |                      |         |
| Compounds Co <sub>3</sub> (HL) <sub>2</sub> (H <sub>2</sub> O) <sub>6</sub> ·6H <sub>2</sub> O |              |                      |                                          |                      |                                          |                                          |                      |         |
| HL                                                                                             | <i>d</i> / Å | <i>Torsion angle</i> | <i>d</i> / Å                             | <i>Torsion angle</i> | <i>J</i> <sub>1</sub> / cm <sup>-1</sup> | <i>d</i> / Å                             | <i>Torsion angle</i> | Θ / K   |
| -                                                                                              | Co1-Co2      | Co1O2...O3Co2        | Co1...Co2                                | Co1O5...O6Co2        |                                          | Co2-Co2                                  | Co2O4...O6Co2        |         |
|                                                                                                |              |                      | average                                  |                      |                                          |                                          |                      |         |
| HcztZol <sup>3-</sup><br>[ref. 13]                                                             | 5.012        | 77.41<br>52.96       |                                          | 65.19                | -1.23                                    | 4.804                                    | 82.56                | +0.26 K |
| HdmtZol <sup>3-</sup><br>[ref. 12]                                                             | 4.961        | 74.07<br>50.96       |                                          | 62.52                | -2.19                                    | 4.719                                    | 83.32                | +0.13 K |
| HcppZol <sup>3-</sup>                                                                          | 5.035        | 78.62<br>51.00       |                                          | 64.81                | -2.19                                    | 4.771                                    | 81.02                | +0.40 K |
